# Supplementary material for: Finding the optimal exchange–correlation functional to describe the excited state properties of push–pull organic dyes designed for thermally activated delayed fluorescence
Source: Royal Society of Chemistry journal article supplement (doi:10.1039/d0cp02409k), 2020-01-01
Supplement: d0cp02409k1.pdf [file d0cp02409k1.pdf]

## Table of contents

|                                                             |     |
|-------------------------------------------------------------|-----|
| Signed error plots (TD-DFT/TDA) .....                       | S2  |
| Mean signed errors tables .....                             | S3  |
| Excited state data tables .....                             | S5  |
| Optimized geometries and HOMO/LUMO topologies .....         | S25 |
| TDDFT versus riCC2 correlation plots.....                   | S26 |
| Experimental section .....                                  | S29 |
| UV-VIS absorption and emission (fluorescence) spectra ..... | S31 |
| NMR spectra .....                                           | S33 |
| Coordinates of optimized geometries.....                    | S40 |
| References .....                                            | S50 |

## Signed error plots (TD-DFT/TDA)

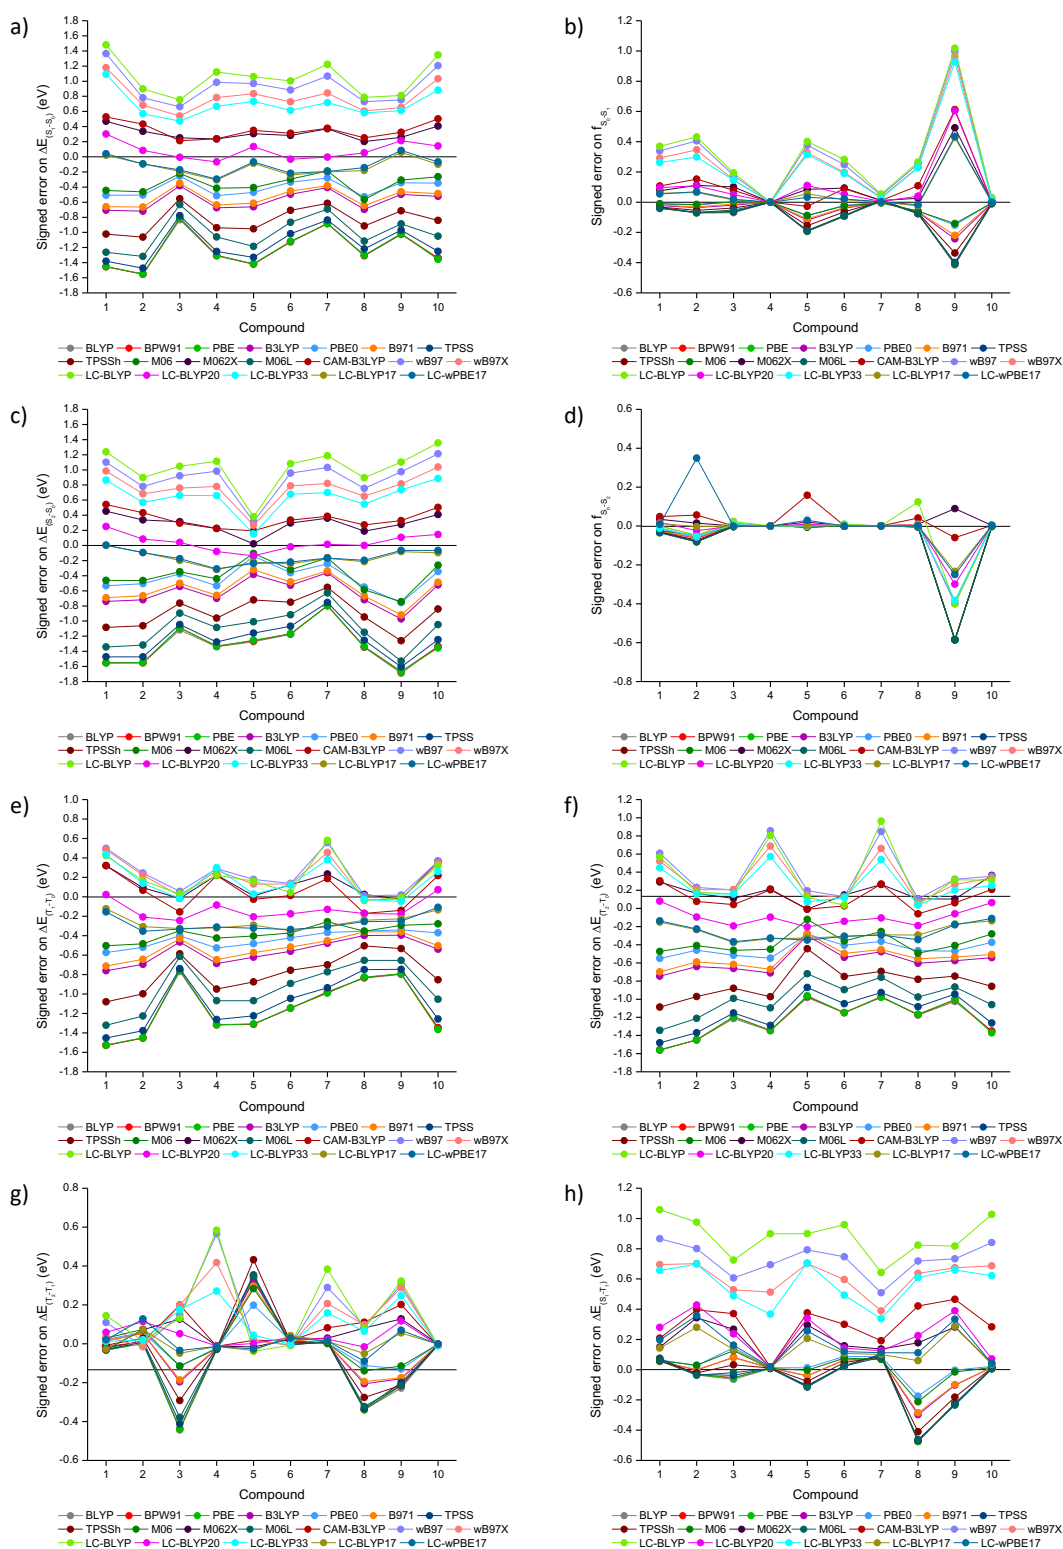

**Figure S1.** Signed errors on each property for each individual XC functional for all 10 compounds obtained using TD-DFT/TDA. a) First vertical singlet excitation energy,  $\Delta E_{S_0-S_1}$ . b) Oscillator strength for the first singlet excitation,  $f_{S_0-S_1}$ . c) Second vertical singlet excitation energy,  $\Delta E_{S_2-S_0}$ . d) Oscillator strength for the second vertical singlet excitation,  $f_{S_0-S_2}$ . e) First vertical triplet excitation energy,  $\Delta E_{T_1-S_0}$ . f) Second vertical triplet excitation energy,  $\Delta E_{T_2-S_0}$ . g) Triplet-triplet energy gap for the first two triplet excited states,  $\Delta E_{T_2-T_1}$ . h) Singlet-triplet gap for the first singlet and triplet excited states,  $\Delta E_{S_1-T_1}$ .

## Mean signed errors tables

**Table S1.** Statistical analysis including mean signed errors (MSEs, eV) and standard deviations (eV) obtained from the comparison between TD-DFT calculations with different XCFs and riCC2 reference values.

|                    | $\Delta E_{S_0-S_1}$ (eV) |        | $f_{S_0-S_1}$ |        | $\Delta E_{S_0-S_2}$ (eV) |        | $f_{S_0-S_2}$ |        | $\Delta E_{S_0-T_1}$ (eV) |        | $\Delta E_{S_0-T_2}$ (eV) |        | $\Delta E_{T_1-T_2}$ (eV) |        | $\Delta E_{S_1-T_1}$ (eV) |        |
|--------------------|---------------------------|--------|---------------|--------|---------------------------|--------|---------------|--------|---------------------------|--------|---------------------------|--------|---------------------------|--------|---------------------------|--------|
|                    | MSE                       | StdDev | MSE           | StdDev | MSE                       | StdDev | MSE           | StdDev | MSE                       | StdDev | MSE                       | StdDev | MSE                       | StdDev | MSE                       | StdDev |
| BLYP               | -1.242                    | 0.213  | -0.116        | 0.144  | -1.329                    | 0.231  | -0.072        | 0.173  | -1.153                    | 0.265  | -1.224                    | 0.190  | -0.070                    | 0.201  | -0.094                    | 0.157  |
| BPW91              | -1.236                    | 0.216  | -0.113        | 0.143  | -1.322                    | 0.230  | -0.072        | 0.173  | -1.153                    | 0.266  | -1.220                    | 0.193  | -0.067                    | 0.201  | -0.090                    | 0.157  |
| PBE                | -1.238                    | 0.216  | -0.113        | 0.143  | -1.322                    | 0.229  | -0.072        | 0.173  | -1.153                    | 0.268  | -1.225                    | 0.195  | -0.072                    | 0.209  | -0.090                    | 0.157  |
| M06L               | -1.021                    | 0.202  | -0.109        | 0.138  | -1.102                    | 0.237  | -0.072        | 0.173  | -0.952                    | 0.224  | -1.005                    | 0.178  | -0.053                    | 0.187  | -0.069                    | 0.148  |
| TPSS               | -1.166                    | 0.204  | -0.110        | 0.139  | -1.244                    | 0.223  | -0.069        | 0.173  | -1.090                    | 0.251  | -1.151                    | 0.188  | -0.062                    | 0.198  | -0.081                    | 0.153  |
| TPSSh              | -0.850                    | 0.149  | -0.095        | 0.119  | -0.904                    | 0.191  | -0.072        | 0.173  | -0.820                    | 0.158  | -0.845                    | 0.157  | -0.025                    | 0.177  | -0.032                    | 0.110  |
| B3LYP              | -0.596                    | 0.110  | -0.074        | 0.089  | -0.628                    | 0.172  | -0.070        | 0.173  | -0.610                    | 0.086  | -0.605                    | 0.112  | 0.005                     | 0.118  | 0.014                     | 0.071  |
| B971               | -0.555                    | 0.102  | -0.068        | 0.083  | -0.583                    | 0.169  | -0.070        | 0.173  | -0.566                    | 0.083  | -0.563                    | 0.105  | 0.003                     | 0.111  | 0.012                     | 0.069  |
| PBE0               | -0.430                    | 0.089  | -0.053        | 0.064  | -0.445                    | 0.164  | -0.006        | 0.258  | -0.526                    | 0.068  | -0.482                    | 0.080  | 0.043                     | 0.063  | 0.096                     | 0.070  |
| M06                | -0.379                    | 0.106  | -0.050        | 0.057  | -0.399                    | 0.179  | -0.068        | 0.173  | -0.460                    | 0.089  | -0.430                    | 0.091  | 0.030                     | 0.041  | 0.081                     | 0.068  |
| M062X              | 0.283                     | 0.102  | 0.084         | 0.107  | 0.246                     | 0.132  | -0.014        | 0.054  | 0.044                     | 0.176  | 0.114                     | 0.117  | 0.071                     | 0.090  | 0.239                     | 0.112  |
| $\omega$ B97       | 0.882                     | 0.239  | 0.254         | 0.233  | 0.850                     | 0.238  | -0.022        | 0.173  | -0.381                    | 0.208  | -0.056                    | 0.423  | 0.325                     | 0.349  | 1.263                     | 0.161  |
| $\omega$ B97X      | 0.740                     | 0.215  | 0.225         | 0.224  | 0.713                     | 0.203  | -0.047        | 0.141  | -0.304                    | 0.195  | -0.006                    | 0.373  | 0.299                     | 0.321  | 1.044                     | 0.142  |
| CAM-B3LYP          | 0.311                     | 0.124  | 0.100         | 0.145  | 0.316                     | 0.118  | -0.009        | 0.096  | -0.332                    | 0.177  | -0.136                    | 0.232  | 0.196                     | 0.181  | 0.643                     | 0.119  |
| LC- $\omega$ PBE17 | -0.136                    | 0.109  | 0.045         | 0.104  | -0.182                    | 0.086  | -0.039        | 0.120  | -0.344                    | 0.099  | -0.302                    | 0.086  | 0.042                     | 0.063  | 0.209                     | 0.127  |
| LC-BLYP17          | -0.157                    | 0.106  | 0.044         | 0.100  | -0.192                    | 0.085  | -0.039        | 0.116  | -0.314                    | 0.089  | -0.287                    | 0.079  | 0.027                     | 0.051  | 0.156                     | 0.102  |
| LC-BLYP20          | 0.056                     | 0.118  | 0.086         | 0.138  | 0.009                     | 0.105  | -0.042        | 0.132  | -0.215                    | 0.129  | -0.147                    | 0.094  | 0.068                     | 0.076  | 0.270                     | 0.136  |
| LC-BLYP33          | 0.650                     | 0.192  | 0.210         | 0.211  | 0.600                     | 0.195  | -0.053        | 0.139  | -0.218                    | 0.178  | 0.009                     | 0.305  | 0.227                     | 0.239  | 0.868                     | 0.125  |
| LC-BLYP            | 0.978                     | 0.264  | 0.270         | 0.236  | 0.956                     | 0.262  | 0.010         | 0.235  | -0.623                    | 0.239  | -0.244                    | 0.494  | 0.379                     | 0.377  | 1.601                     | 0.187  |
| LC-BLYP20-M062X    | /                         | /      | /             | /      | /                         | /      | /             | /      | /                         | /      | /                         | /      | /                         | /      | 0.012                     | 0.179  |

**Table S2.** Statistical analysis including mean signed errors (MSEs, eV) and standard deviations (eV) obtained from the comparison between TD-DFT/TDA calculations with different XCFs and rICC2 reference values.

|                    | $\Delta E_{S_0-S_1}$ (eV) |        | $f_{S_0-S_1}$ |        | $\Delta E_{S_0-S_2}$ (eV) |        | $f_{S_0-S_2}$ |        | $\Delta E_{S_0-T_1}$ (eV) |        | $\Delta E_{S_0-T_2}$ (eV) |        | $\Delta E_{T_1-T_2}$ (eV) |        | $\Delta E_{S_1-T_1}$ (eV) |        |
|--------------------|---------------------------|--------|---------------|--------|---------------------------|--------|---------------|--------|---------------------------|--------|---------------------------|--------|---------------------------|--------|---------------------------|--------|
|                    | MSE                       | StdDev | MSE           | StdDev | MSE                       | StdDev | MSE           | StdDev | MSE                       | StdDev | MSE                       | StdDev | MSE                       | StdDev | MSE                       | StdDev |
| BLYP               | -1.220                    | 0.226  | -0.096        | 0.120  | -1.318                    | 0.242  | -0.071        | 0.173  | -1.148                    | 0.269  | -1.222                    | 0.191  | -0.074                    | 0.205  | -0.072                    | 0.161  |
| BPW91              | -1.214                    | 0.229  | -0.093        | 0.119  | -1.310                    | 0.242  | -0.071        | 0.173  | -1.146                    | 0.272  | -1.217                    | 0.194  | -0.071                    | 0.205  | -0.067                    | 0.162  |
| PBE                | -1.215                    | 0.229  | -0.093        | 0.119  | -1.311                    | 0.241  | -0.071        | 0.173  | -1.147                    | 0.273  | -1.218                    | 0.196  | -0.070                    | 0.206  | -0.068                    | 0.162  |
| M06L               | -1.001                    | 0.213  | -0.093        | 0.118  | -1.092                    | 0.245  | -0.072        | 0.173  | -0.932                    | 0.240  | -0.992                    | 0.184  | -0.060                    | 0.195  | -0.069                    | 0.157  |
| TPSS               | -1.144                    | 0.216  | -0.091        | 0.116  | -1.236                    | 0.236  | -0.071        | 0.173  | -1.079                    | 0.259  | -1.143                    | 0.193  | -0.064                    | 0.202  | -0.065                    | 0.160  |
| TPSSh              | -0.828                    | 0.160  | -0.075        | 0.098  | -0.894                    | 0.198  | -0.070        | 0.173  | -0.784                    | 0.190  | -0.818                    | 0.171  | -0.034                    | 0.196  | -0.044                    | 0.142  |
| B3LYP              | -0.574                    | 0.120  | -0.055        | 0.071  | -0.618                    | 0.177  | -0.069        | 0.173  | -0.560                    | 0.122  | -0.580                    | 0.122  | -0.020                    | 0.148  | -0.014                    | 0.109  |
| B971               | -0.533                    | 0.113  | -0.050        | 0.065  | -0.573                    | 0.173  | -0.068        | 0.173  | -0.520                    | 0.116  | -0.540                    | 0.115  | -0.019                    | 0.138  | -0.013                    | 0.105  |
| PBE0               | -0.407                    | 0.099  | -0.035        | 0.048  | -0.435                    | 0.168  | -0.066        | 0.174  | -0.436                    | 0.079  | -0.444                    | 0.082  | -0.008                    | 0.093  | 0.028                     | 0.080  |
| M06                | -0.356                    | 0.113  | -0.035        | 0.045  | -0.389                    | 0.182  | -0.067        | 0.173  | -0.372                    | 0.079  | -0.371                    | 0.113  | 0.001                     | 0.115  | 0.015                     | 0.086  |
| M062X              | 0.322                     | 0.088  | 0.100         | 0.137  | 0.289                     | 0.116  | 0.017         | 0.026  | 0.136                     | 0.135  | 0.176                     | 0.103  | 0.040                     | 0.056  | 0.187                     | 0.104  |
| $\omega$ B97       | 0.966                     | 0.208  | 0.287         | 0.274  | 0.903                     | 0.234  | -0.044        | 0.120  | 0.236                     | 0.183  | 0.385                     | 0.269  | 0.149                     | 0.177  | 0.731                     | 0.103  |
| $\omega$ B97X      | 0.812                     | 0.187  | 0.255         | 0.265  | 0.758                     | 0.199  | -0.041        | 0.117  | 0.199                     | 0.179  | 0.322                     | 0.213  | 0.123                     | 0.141  | 0.612                     | 0.100  |
| CAM-B3LYP          | 0.356                     | 0.105  | 0.113         | 0.175  | 0.351                     | 0.109  | 0.025         | 0.054  | 0.053                     | 0.168  | 0.113                     | 0.118  | 0.060                     | 0.080  | 0.303                     | 0.127  |
| LC- $\omega$ PBE17 | -0.103                    | 0.116  | 0.062         | 0.127  | -0.153                    | 0.091  | 0.014         | 0.136  | -0.273                    | 0.078  | -0.264                    | 0.089  | 0.010                     | 0.056  | 0.171                     | 0.109  |
| LC-BLYP17          | -0.125                    | 0.113  | 0.061         | 0.125  | -0.164                    | 0.090  | -0.022        | 0.071  | -0.262                    | 0.075  | -0.261                    | 0.079  | 0.001                     | 0.042  | 0.137                     | 0.090  |
| LC-BLYP20          | 0.096                     | 0.119  | 0.107         | 0.171  | 0.040                     | 0.106  | -0.029        | 0.091  | -0.130                    | 0.098  | -0.094                    | 0.095  | 0.036                     | 0.047  | 0.226                     | 0.130  |
| LC-BLYP33          | 0.721                     | 0.168  | 0.241         | 0.254  | 0.645                     | 0.194  | -0.043        | 0.115  | 0.157                     | 0.168  | 0.255                     | 0.184  | 0.098                     | 0.101  | 0.563                     | 0.127  |
| LC-BLYP            | 1.073                     | 0.230  | 0.305         | 0.280  | 1.030                     | 0.254  | -0.029        | 0.130  | 0.190                     | 0.191  | 0.351                     | 0.307  | 0.160                     | 0.195  | 0.883                     | 0.125  |
| LC-BLYP20-M062X    | /                         | /      | /             | /      | /                         | /      | /             | /      | /                         | /      | /                         | /      | /                         | /      | -0.040                    | 0.170  |

## Excited state data tables

**Table S3.** Excited state data for compound **1** calculated using TD-DFT with the functionals mentioned in the table, 6-311G(d) as the basis set and cyclohexane for the PCM model.

|                    | 1st singlet state |                     |             | 2nd singlet state |                     |             | 1st triplet state |             | 2nd triplet state |             | $\Delta E_{T_1-T_2}$ | $\Delta E_{S_1-T_1}$ |
|--------------------|-------------------|---------------------|-------------|-------------------|---------------------|-------------|-------------------|-------------|-------------------|-------------|----------------------|----------------------|
|                    | Transition        | oscillator strength | Energy (eV) | Transition        | oscillator strength | Energy (eV) | Transition        | Energy (eV) | Transition        | Energy (eV) | Energy (eV)          | Energy (eV)          |
| RI-CC2             | 180->181          | 0.1704              | 2.969       | 179->181          | 0.0980              | 2.996       | 180->181          | 2.903       | 179->181          | 2.948       | 0.045                | 0.067                |
| BLYP               | 180->181          | 0.1136              | 1.491       | 179->181          | 0.0602              | 1.437       | 180->181          | 1.376       | 179->181          | 1.391       | 0.015                | 0.061                |
| BPW91              | 180->181          | 0.1164              | 1.492       | 179->181          | 0.0625              | 1.434       | 180->181          | 1.372       | 179->181          | 1.385       | 0.014                | 0.063                |
| PBE                | 180->181          | 0.1164              | 1.493       | 179->181          | 0.0623              | 1.434       | 180->181          | 1.374       | 179->181          | 1.386       | 0.012                | 0.061                |
| M06L               | 180->181          | 0.1148              | 1.688       | 179->181          | 0.0600              | 1.647       | 180->181          | 1.576       | 179->181          | 1.602       | 0.026                | 0.112                |
| TPSS               | 180->181          | 0.1181              | 1.566       | 179->181          | 0.0632              | 1.514       | 180->181          | 1.447       | 179->181          | 1.465       | 0.018                | 0.067                |
| TPSSh              | 180->181          | 0.1189              | 1.929       | 179->181          | 0.0596              | 1.906       | 180->181          | 1.816       | 179->181          | 1.857       | 0.041                | 0.090                |
| B3LYP              | 180->181          | 0.1299              | 2.247       | 179->181          | 0.0618              | 2.249       | 180->181          | 2.133       | 179->181          | 2.197       | 0.063                | 0.114                |
| B971               | 180->181          | 0.1335              | 2.294       | 179->181          | 0.0637              | 2.297       | 180->181          | 2.180       | 179->181          | 2.243       | 0.063                | 0.114                |
| PBE0               | 180->181          | 0.1429              | 2.445       | 179->181          | 0.0683              | 2.454       | 180->181          | 2.315       | 179->181          | 2.387       | 0.072                | 0.130                |
| M06                | 180->181          | 0.1427              | 2.509       | 179->181          | 0.0671              | 2.527       | 180->181          | 2.384       | 179->181          | 2.465       | 0.081                | 0.125                |
| M06-2X             | 180->181          | 0.2333              | 3.417       | 179->181          | 0.1172              | 3.424       | 179->181          | 3.195       | 180->181          | 3.210       | 0.015                | 0.222                |
| $\omega$ B97       | 180->181          | 0.4916              | 4.248       | 179->181          | 0.0744              | 4.042       | 169->181          | 2.629       | 180->183          | 3.042       | 0.412                | 1.619                |
| $\omega$ B97X      | 180->181          | 0.4547              | 4.086       | 179->181          | 0.0853              | 3.935       | 169->181          | 2.739       | 180->183          | 3.121       | 0.382                | 1.347                |
| CAM-B3LYP          | 180->181          | 0.2658              | 3.470       | 179->181          | 0.1356              | 3.519       | 167->181          | 2.754       | 180->183          | 3.054       | 0.300                | 0.716                |
| LC- $\omega$ PBE17 | 180->181          | 0.2109              | 2.988       | 179->181          | 0.0949              | 2.984       | 177->181          | 2.720       | 180->181          | 2.789       | 0.069                | 0.268                |
| LC-BLYP17          | 180->181          | 0.2136              | 2.968       | 179->181          | 0.1000              | 2.980       | 177->181          | 2.760       | 180->181          | 2.779       | 0.020                | 0.209                |
| LC-BLYP20          | 180->181          | 0.2540              | 3.246       | 179->181          | 0.1023              | 3.225       | 179->181          | 2.897       | 180->181          | 2.999       | 0.102                | 0.349                |
| LC-BLYP33          | 180->181          | 0.4245              | 4.001       | 179->181          | 0.0757              | 3.814       | 168->181          | 2.884       | 180->183          | 3.168       | 0.284                | 1.117                |
| LC-BLYP            | 180->181          | 0.5119              | 4.347       | 179->181          | 0.0849              | 4.170       | 168->181          | 2.377       | 180->183          | 2.819       | 0.442                | 1.971                |
| LC-BLYP20 - M06-2X |                   |                     |             |                   |                     |             |                   |             |                   |             |                      | 0.051                |

**Table S4.** Excited state data for compound **2** calculated using TD-DFT with the functionals mentioned in the table, 6-311G(d) as the basis set and cyclohexane for the PCM model.

|                    | 1st singlet state |                     |             | 2nd singlet state |                     |             | 1st triplet state |             | 2nd triplet state |             | $\Delta E_{T_1-T_2}$ | $\Delta E_{S_1-T_1}$ |
|--------------------|-------------------|---------------------|-------------|-------------------|---------------------|-------------|-------------------|-------------|-------------------|-------------|----------------------|----------------------|
|                    | Transition        | oscillator strength | Energy (eV) | Transition        | oscillator strength | Energy (eV) | Transition        | Energy (eV) | Transition        | Energy (eV) | Energy (eV)          | Energy (eV)          |
| RI-CC2             | 176->177          | 0.1571              | 3.468       | 175->177          | 0.1306              | 3.496       | 176->177          | 3.337       | 175->177          | 3.354       | 0.016                | 0.130                |
| BLYP               | 176->177          | 0.0761              | 1.964       | 175->177          | 0.0458              | 1.937       | 176->177          | 1.881       | 175->177          | 1.903       | 0.023                | 0.084                |
| BPW91              | 176->177          | 0.0786              | 1.968       | 175->177          | 0.0481              | 1.939       | 176->177          | 1.882       | 175->177          | 1.903       | 0.021                | 0.086                |
| PBE                | 176->177          | 0.0786              | 1.971       | 175->177          | 0.0477              | 1.941       | 176->177          | 1.886       | 175->177          | 1.905       | 0.019                | 0.086                |
| M06L               | 176->177          | 0.0817              | 2.194       | 175->177          | 0.0480              | 2.175       | 176->177          | 2.105       | 175->177          | 2.138       | 0.033                | 0.089                |
| TPSS               | 176->177          | 0.0807              | 2.045       | 175->177          | 0.0807              | 2.045       | 176->177          | 1.956       | 175->177          | 1.981       | 0.024                | 0.089                |
| TPSSH              | 176->177          | 0.0901              | 2.434       | 175->177          | 0.0522              | 2.427       | 176->177          | 2.330       | 175->177          | 2.377       | 0.047                | 0.104                |
| B3LYP              | 176->177          | 0.1080              | 2.756       | 175->177          | 0.0620              | 2.771       | 176->177          | 2.629       | 175->177          | 2.702       | 0.074                | 0.127                |
| B971               | 176->177          | 0.1125              | 2.810       | 175->177          | 0.0650              | 2.826       | 176->177          | 2.681       | 175->177          | 2.755       | 0.073                | 0.129                |
| PBE0               | 176->177          | 0.1256              | 2.961       | 175->177          | 0.6988              | 2.981       | 176->177          | 2.791       | 175->177          | 2.864       | 0.072                | 0.169                |
| M06                | 176->177          | 0.1309              | 2.998       | 175->177          | 0.0758              | 3.024       | 176->177          | 2.825       | 175->177          | 2.910       | 0.086                | 0.173                |
| M06-2X             | 176->177          | 0.2676              | 3.865       | 175->177          | 0.1110              | 3.776       | 175->177          | 3.391       | 176->177          | 3.450       | 0.059                | 0.474                |
| $\omega$ B97       | 176->177          | 0.5494              | 4.388       | 175->177          | 0.0653              | 4.215       | 173->177          | 2.868       | 176->179          | 3.052       | 0.184                | 1.520                |
| $\omega$ B97X      | 176->177          | 0.5041              | 4.294       | 175->177          | 0.0713              | 4.125       | 172->177          | 2.967       | 176->179          | 3.134       | 0.167                | 1.327                |
| CAM-B3LYP          | 176->177          | 0.3100              | 3.886       | 175->177          | 0.1717              | 3.893       | 170->177          | 2.958       | 176->179          | 3.085       | 0.127                | 0.928                |
| LC- $\omega$ PBE17 | 176->177          | 0.2184              | 3.441       | 175->177          | 0.0944              | 3.375       | 174->177          | 2.950       | 176->177          | 3.075       | 0.125                | 0.492                |
| LC-BLYP17          | 176->177          | 0.2123              | 3.412       | 175->177          | 0.1126              | 3.380       | 173->177          | 3.003       | 176->177          | 3.087       | 0.085                | 0.409                |
| LC-BLYP20          | 176->177          | 0.2595              | 3.648       | 175->177          | 0.0928              | 3.549       | 173->177          | 3.097       | 176->177          | 3.198       | 0.101                | 0.551                |
| LC-BLYP33          | 176->177          | 0.4595              | 4.210       | 175->177          | 0.0664              | 4.013       | 172->177          | 3.086       | 176->179          | 3.188       | 0.103                | 1.125                |
| LC-BLYP            | 176->177          | 0.5666              | 4.467       | 175->177          | 0.0744              | 4.324       | 169->177          | 2.590       | 176->179          | 2.826       | 0.237                | 1.877                |
| LC-BLYP20 - M06-2X |                   |                     |             |                   |                     |             |                   |             |                   |             |                      | 0.256                |

**Table S5.** Excited state data for compound **3** calculated using TD-DFT with the functionals mentioned in the table, 6-311G(d) as the basis set and cyclohexane for the PCM model.

|                    | 1st singlet state |                     |             | 2nd singlet state |                     |             | 1st triplet state |             | 2nd triplet state |             | $\Delta E_{T_1-T_2}$ | $\Delta E_{S_1-T_1}$ |
|--------------------|-------------------|---------------------|-------------|-------------------|---------------------|-------------|-------------------|-------------|-------------------|-------------|----------------------|----------------------|
|                    | Transition        | oscillator strength | Energy (eV) | Transition        | oscillator strength | Energy (eV) | Transition        | Energy (eV) | Transition        | Energy (eV) | Energy (eV)          | Energy (eV)          |
| RI-CC2             | 123->124          | 0.2307              | 2.474       | 122->124          | 0.0083              | 3.355       | 123->124          | 2.081       | 122->124          | 3.256       | 1.175                | 0.393                |
| BLYP               | 123->124          | 0.1288              | 1.579       | 122->124          | 0.0048              | 2.209       | 123->124          | 1.289       | 122->124          | 2.038       | 0.749                | 0.290                |
| BPW91              | 123->124          | 0.1355              | 1.602       | 122->124          | 0.0047              | 2.236       | 123->124          | 1.298       | 122->124          | 2.057       | 0.760                | 0.304                |
| PBE                | 123->124          | 0.1360              | 1.598       | 122->124          | 0.0050              | 2.234       | 123->124          | 1.299       | 122->124          | 2.055       | 0.757                | 0.300                |
| M06L               | 123->124          | 0.1494              | 1.781       | 122->124          | 0.0043              | 2.431       | 123->124          | 1.396       | 122->124          | 2.252       | 0.856                | 0.386                |
| TPSS               | 123->124          | 0.1367              | 1.635       | 122->124          | 0.0047              | 2.280       | 123->124          | 1.298       | 122->124          | 2.096       | 0.798                | 0.337                |
| TPSSh              | 123->124          | 0.1567              | 1.854       | 122->124          | 0.0045              | 2.561       | 123->124          | 1.399       | 122->124          | 2.360       | 0.961                | 0.454                |
| B3LYP              | 123->124          | 0.1754              | 2.022       | 122->124          | 0.0047              | 2.783       | 123->124          | 1.504       | 122->124          | 2.577       | 1.073                | 0.518                |
| B971               | 123->124          | 0.1814              | 2.054       | 122->124          | 0.0047              | 2.825       | 123->124          | 1.547       | 122->124          | 2.623       | 1.076                | 0.507                |
| PBE0               | 123->124          | 0.1953              | 2.147       | 122->124          | 0.0049              | 2.950       | 123->124          | 1.508       | 122->124          | 2.711       | 1.203                | 0.640                |
| M06                | 123->124          | 0.1983              | 2.182       | 122->124          | 0.0041              | 2.979       | 123->124          | 1.572       | 122->124          | 2.765       | 1.194                | 0.611                |
| M06-2X             | 123->124          | 0.2814              | 2.632       | 122->124          | 0.0077              | 3.629       | 123->124          | 1.917       | 122->124          | 3.325       | 1.408                | 0.715                |
| $\omega$ B97       | 123->124          | 0.3597              | 3.012       | 122->124          | 0.0254              | 4.216       | 123->124          | 1.591       | 123->126          | 3.191       | 1.600                | 1.422                |
| $\omega$ B97X      | 123->124          | 0.3314              | 2.898       | 122->124          | 0.0168              | 4.063       | 123->124          | 1.651       | 123->126          | 3.280       | 1.629                | 1.247                |
| CAM-B3LYP          | 123->124          | 0.2671              | 2.595       | 122->124          | 0.0076              | 3.614       | 123->124          | 1.594       | 122->124          | 3.194       | 1.601                | 1.001                |
| LC- $\omega$ PBE17 | 123->124          | 0.2120              | 2.221       | 122->124          | 0.0060              | 3.142       | 123->124          | 1.639       | 122->124          | 2.866       | 1.227                | 0.582                |
| LC-BLYP17          | 123->124          | 0.2070              | 2.200       | 122->124          | 0.0059              | 3.120       | 123->124          | 1.672       | 122->124          | 2.865       | 1.194                | 0.528                |
| LC-BLYP20          | 123->124          | 0.2398              | 2.380       | 122->124          | 0.0071              | 3.355       | 123->124          | 1.687       | 122->124          | 3.029       | 1.342                | 0.693                |
| LC-BLYP33          | 123->124          | 0.3288              | 2.834       | 122->124          | 0.0159              | 3.966       | 123->124          | 1.724       | 122->124          | 3.265       | 1.542                | 1.110                |
| LC-BLYP            | 123->124          | 0.3753              | 3.094       | 122->124          | 0.0384              | 4.332       | 123->124          | 1.347       | 123->126          | 2.945       | 1.599                | 1.747                |
| LC-BLYP20 - M06-2X |                   |                     |             |                   |                     |             |                   |             |                   |             |                      | 0.463                |

**Table S6.** Excited state data for compound **4** calculated using TD-DFT with the functionals mentioned in the table, 6-311G(d) as the basis set and cyclohexane for the PCM model.

|                    | 1st singlet state |                     |             | 2nd singlet state |                     |             | 1st triplet state |             | 2nd triplet state |             | $\Delta E_{T_1-T_2}$ | $\Delta E_{S_1-T_1}$ |
|--------------------|-------------------|---------------------|-------------|-------------------|---------------------|-------------|-------------------|-------------|-------------------|-------------|----------------------|----------------------|
|                    | Transition        | oscillator strength | Energy (eV) | Transition        | oscillator strength | Energy (eV) | Transition        | Energy (eV) | Transition        | Energy (eV) | Energy (eV)          | Energy (eV)          |
| RI-CC2             | 145->146          | 0.0000              | 2.456       | 144->146          | 0.0000              | 2.525       | 145->146          | 2.457       | 144->146          | 2.527       | 0.069                | -0.002               |
| BLYP               | 145->146          | 0.0000              | 1.144       | 144->146          | 0.0000              | 1.184       | 145->146          | 1.138       | 144->146          | 1.177       | 0.040                | 0.006                |
| BPW91              | 145->146          | 0.0000              | 1.153       | 144->146          | 0.0000              | 1.194       | 145->146          | 1.145       | 144->146          | 1.185       | 0.041                | 0.008                |
| PBE                | 145->146          | 0.0000              | 1.149       | 144->146          | 0.0000              | 1.191       | 145->146          | 1.141       | 144->146          | 1.182       | 0.041                | 0.008                |
| M06L               | 145->146          | 0.0000              | 1.396       | 144->146          | 0.0000              | 1.439       | 145->146          | 1.389       | 144->146          | 1.431       | 0.042                | 0.007                |
| TPSS               | 145->146          | 0.0000              | 1.203       | 144->146          | 0.0000              | 1.246       | 145->146          | 1.195       | 144->146          | 1.238       | 0.043                | 0.008                |
| TPSSh              | 145->146          | 0.0000              | 1.518       | 144->146          | 0.0000              | 1.563       | 145->146          | 1.507       | 144->146          | 1.553       | 0.045                | 0.010                |
| B3LYP              | 145->146          | 0.0000              | 1.779       | 144->146          | 0.0000              | 1.825       | 145->146          | 1.770       | 144->146          | 1.815       | 0.045                | 0.010                |
| B971               | 145->146          | 0.0000              | 1.818       | 144->146          | 0.0000              | 1.865       | 145->146          | 1.808       | 144->146          | 1.855       | 0.047                | 0.010                |
| PBE0               | 145->146          | 0.0000              | 1.941       | 144->146          | 0.0000              | 1.989       | 145->146          | 1.928       | 144->146          | 1.976       | 0.048                | 0.013                |
| M06                | 145->146          | 0.0000              | 2.038       | 144->146          | 0.0000              | 2.082       | 145->146          | 2.032       | 144->146          | 2.075       | 0.044                | 0.006                |
| M06-2X             | 145->146          | 0.0000              | 2.687       | 144->146          | 0.0000              | 2.745       | 145->146          | 2.676       | 144->146          | 2.735       | 0.058                | 0.011                |
| $\omega$ B97       | 145->146          | 0.0000              | 3.430       | 144->146          | 0.0000              | 3.499       | 139->146          | 2.083       | 136->146          | 3.147       | 1.064                | 1.347                |
| $\omega$ B97X      | 145->146          | 0.0000              | 3.232       | 144->146          | 0.0000              | 3.297       | 139->146          | 2.169       | 145->146          | 3.199       | 1.030                | 1.063                |
| CAM-B3LYP          | 145->146          | 0.0000              | 2.690       | 144->146          | 0.0000              | 2.745       | 139->146          | 2.165       | 145->146          | 2.672       | 0.507                | 0.526                |
| LC- $\omega$ PBE17 | 145->146          | 0.0001              | 2.159       | 144->146          | 0.0000              | 2.214       | 145->146          | 2.143       | 144->146          | 2.199       | 0.055                | 0.016                |
| LC-BLYP17          | 145->146          | 0.0000              | 2.149       | 144->146          | 0.0000              | 2.204       | 145->146          | 2.136       | 144->146          | 2.191       | 0.055                | 0.014                |
| LC-BLYP20          | 145->146          | 0.0000              | 2.385       | 144->146          | 0.0000              | 2.443       | 145->146          | 2.369       | 144->146          | 2.427       | 0.058                | 0.016                |
| LC-BLYP33          | 145->146          | 0.0000              | 3.116       | 144->146          | 0.0000              | 3.177       | 139->146          | 2.327       | 145->146          | 3.088       | 0.761                | 0.789                |
| LC-BLYP            | 145->146          | 0.0000              | 3.565       | 144->146          | 0.0000              | 3.626       | 139->146          | 1.813       | 145->150          | 2.933       | 1.121                | 1.752                |
| LC-BLYP20 - M06-2X |                   |                     |             |                   |                     |             |                   |             |                   |             |                      | -0.291               |



**Table S7.** Excited state data for compound **5** calculated using TD-DFT with the functionals mentioned in the table, 6-311G(d) as the basis set and cyclohexane for the PCM model.

|                    | 1st singlet state |                     |             | 2nd singlet state |                     |             | 1st triplet state |             | 2nd triplet state |             | $\Delta E_{T_1-T_2}$ | $\Delta E_{S_1-T_1}$ |
|--------------------|-------------------|---------------------|-------------|-------------------|---------------------|-------------|-------------------|-------------|-------------------|-------------|----------------------|----------------------|
|                    | Transition        | oscillator strength | Energy (eV) | Transition        | oscillator strength | Energy (eV) | Transition        | Energy (eV) | Transition        | Energy (eV) | Energy (eV)          | Energy (eV)          |
| RI-CC2             | 123 ->124         | 0.3962              | 3.524       | 115->124          | 0.0037              | 3.718       | 123->124          | 3.227       | 115->124          | 3.411       | 0.185                | 0.297                |
| BLYP               | 123 ->124         | 0.1815              | 2.075       | 122->124          | 0                   | 2.443       | 123 ->124         | 1.913       | 122 ->124         | 2.429       | 0.162                | 0.516                |
| BPW91              | 123 ->124         | 0.1841              | 2.077       | 122->124          | 0.0000              | 2.455       | 123 ->124         | 1.910       | 122 ->124         | 2.439       | 0.529                | 0.167                |
| PBE                | 123 ->124         | 0.1844              | 2.080       | 122->124          | 0.0000              | 2.463       | 123 ->124         | 1.914       | 122 ->124         | 2.447       | 0.533                | 0.166                |
| M06L               | 123 ->124         | 0.1886              | 2.314       | 122->124          | 0.0000              | 2.706       | 123 ->124         | 2.141       | 122 ->124         | 2.685       | 0.544                | 0.173                |
| TPSS               | 123 ->124         | 0.1894              | 2.167       | 122->124          | 0.0000              | 2.556       | 123 ->124         | 1.993       | 122 ->124         | 2.538       | 0.545                | 0.174                |
| TPSSh              | 123 ->124         | 0.2191              | 2.543       | 122->124          | 0.0000              | 2.994       | 123 ->124         | 2.323       | 120 ->124         | 2.920       | 0.597                | 0.220                |
| B3LYP              | 123 ->124         | 0.2553              | 2.834       | 122->124          | 0.0000              | 3.331       | 123 ->124         | 2.560       | 120 ->124         | 3.056       | 0.496                | 0.274                |
| B971               | 123 ->124         | 0.2629              | 2.882       | 122->124          | 0.0000              | 3.395       | 123 ->124         | 2.612       | 120 ->124         | 3.085       | 0.473                | 0.270                |
| PBE0               | 123 ->124         | 0.2858              | 3.024       | 122->124          | 0.0000              | 3.572       | 123 ->124         | 2.654       | 120 ->124         | 3.058       | 0.404                | 0.371                |
| M06                | 123 ->124         | 0.2883              | 3.086       | 122->124          | 0.0000              | 3.607       | 123 ->124         | 2.732       | 122 ->125         | 3.047       | 0.314                | 0.354                |
| M06-2X             | 123 ->124         | 0.4545              | 3.782       | 115->124          | 0.0204              | 3.662       | 120 ->124         | 3.145       | 123 ->124         | 3.332       | 0.187                | 0.637                |
| $\omega$ B97       | 123 ->124         | 0.7371              | 4.406       | 120->124          | 0.0051              | 3.995       | 122 ->125         | 2.961       | 120 ->124         | 2.980       | 0.019                | 1.446                |
| $\omega$ B97X      | 123 ->124         | 0.6987              | 4.285       | 120->124          | 0.0064              | 3.948       | 120 ->124         | 3.034       | 122 ->125         | 3.069       | 0.035                | 1.251                |
| CAM-B3LYP          | 123 ->124         | 0.3934              | 3.824       | 116->124          | 0.1124              | 3.880       | 120 ->124         | 2.943       | 122 ->125         | 3.062       | 0.119                | 0.881                |
| LC- $\omega$ PBE17 | 123 ->124         | 0.3911              | 3.413       | 121->124          | 0.0447              | 3.457       | 121 ->124         | 2.841       | 123 ->124         | 3.008       | 0.167                | 0.572                |
| LC-BLYP17          | 123 ->124         | 0.4161              | 3.395       | 121->124          | 0.0143              | 3.473       | 121 ->124         | 2.883       | 123 ->124         | 3.048       | 0.165                | 0.512                |
| LC-BLYP20          | 123 ->124         | 0.4480              | 3.617       | 121->124          | 0.0442              | 3.552       | 121 ->124         | 2.960       | 123 ->124         | 3.148       | 0.188                | 0.657                |
| LC-BLYP33          | 123 ->124         | 0.6833              | 4.187       | 120->124          | 0.0055              | 3.837       | 120 ->124         | 3.063       | 122 ->125         | 3.172       | 0.108                | 1.124                |
| LC-BLYP            | 123 ->124         | 0.7493              | 4.484       | 117->124          | 0.0054              | 4.053       | 122 ->125         | 2.688       | 120 ->124         | 2.781       | 0.093                | 1.796                |
| LC-BLYP20 - M06-2X |                   |                     |             |                   |                     |             |                   |             |                   |             |                      | 0.472                |

**Table S8.** Excited state data for compound **6** calculated using TD-DFT with the functionals mentioned in the table, 6-311G(d) as the basis set and cyclohexane for the PCM model.

|                    | 1st singlet state |                     |             | 2nd singlet state |                     |             | 1st triplet state |             | 2nd triplet state |             | $\Delta E_{T_1-T_2}$ | $\Delta E_{S_1-T_1}$ |
|--------------------|-------------------|---------------------|-------------|-------------------|---------------------|-------------|-------------------|-------------|-------------------|-------------|----------------------|----------------------|
|                    | Transition        | oscillator strength | Energy (eV) | Transition        | oscillator strength | Energy (eV) | Transition        | Energy (eV) | Transition        | Energy (eV) | Energy (eV)          | Energy (eV)          |
| RI-CC2             | 177 ->178         | 0.2074              | 3.565       | 176->178          | 0.0012              | 3.646       | 176->178          | 3.494       | 177->178          | 3.502       | 0.009                | 0.071                |
| BLYP               | 177 -> 178        | 0.1103              | 2.427       | 176->178          | 0.0003              | 2.454       | 177 -> 178        | 2.343       | 176 ->178         | 2.349       | 0.005                | 0.083                |
| BPW91              | 177 -> 178        | 0.1118              | 2.433       | 176->178          | 0.0003              | 2.460       | 177 -> 178        | 2.346       | 176 ->178         | 2.348       | 0.002                | 0.088                |
| PBE                | 177 -> 178        | 0.1112              | 2.434       | 176->178          | 0.0003              | 2.460       | 177 -> 178        | 2.347       | 176 ->178         | 2.351       | 0.004                | 0.087                |
| M06L               | 177 -> 178        | 0.1170              | 2.688       | 176->178          | 0.0003              | 2.713       | 176 -> 178        | 2.591       | 177 ->178         | 2.593       | 0.002                | 0.097                |
| TPSS               | 177 -> 178        | 0.1157              | 2.535       | 176->178          | 0.0003              | 2.561       | 177 -> 178        | 2.443       | 176 ->178         | 2.443       | 0.001                | 0.092                |
| TPSSh              | 177 -> 178        | 0.1364              | 2.842       | 176->178          | 0.0005              | 2.878       | 177 -> 178        | 2.727       | 176 ->178         | 2.729       | 0.002                | 0.115                |
| B3LYP              | 177 -> 178        | 0.1586              | 3.053       | 176->178          | 0.0006              | 3.101       | 177 -> 178        | 2.921       | 176 ->178         | 2.924       | 0.003                | 0.132                |
| B971               | 177 -> 178        | 0.1635              | 3.096       | 176->178          | 0.0007              | 3.144       | 177 -> 178        | 2.966       | 176 ->178         | 2.974       | 0.009                | 0.130                |
| PBE0               | 177 -> 178        | 0.1774              | 3.213       | 176->178          | 0.0008              | 3.267       | 176 -> 178        | 2.986       | 177 ->178         | 3.042       | 0.055                | 0.227                |
| M06                | 177 -> 178        | 0.1765              | 3.250       | 176->178          | 0.0007              | 3.307       | 176 -> 178        | 3.015       | 175 ->181         | 3.046       | 0.031                | 0.235                |
| M06-2X             | 177 -> 178        | 0.2899              | 3.816       | 176->178          | 0.0025              | 3.915       | 176 -> 178        | 3.541       | 177 ->178         | 3.588       | 0.047                | 0.275                |
| $\omega$ B97       | 177 -> 178        | 0.4592              | 4.383       | 176->178          | 0.0205              | 4.546       | 175 -> 180        | 2.962       | 174 ->180         | 2.963       | 0.001                | 1.421                |
| $\omega$ B97X      | 177 -> 178        | 0.4027              | 4.241       | 176->178          | 0.0055              | 4.396       | 175 -> 180        | 3.070       | 174 ->180         | 3.072       | 0.001                | 1.171                |
| CAM-B3LYP          | 177 -> 178        | 0.2886              | 3.846       | 176->178          | 0.0021              | 3.953       | 174 -> 181        | 3.063       | 175 ->181         | 3.065       | 0.002                | 0.783                |
| LC- $\omega$ PBE17 | 177 -> 178        | 0.2193              | 3.327       | 176->178          | 0.0013              | 3.404       | 176 -> 178        | 3.125       | 177 ->178         | 3.140       | 0.016                | 0.202                |
| LC-BLYP17          | 177 -> 178        | 0.2154              | 3.303       | 176->178          | 0.0013              | 3.381       | 177 -> 178        | 3.133       | 176 ->178         | 3.155       | 0.022                | 0.170                |
| LC-BLYP20          | 177 -> 178        | 0.2507              | 3.508       | 176->178          | 0.0017              | 3.602       | 176 -> 178        | 3.277       | 177 ->180         | 3.299       | 0.022                | 0.231                |
| LC-BLYP33          | 177 -> 178        | 0.3928              | 4.131       | 176->178          | 0.0059              | 4.284       | 174 -> 180        | 3.174       | 174 ->181         | 3.176       | 0.002                | 0.957                |
| LC-BLYP            | 177 -> 178        | 0.4933              | 4.488       | 176->178          | 0.0198              | 4.623       | 175 -> 180        | 2.688       | 174 ->180         | 2.689       | 0.001                | 1.800                |
| LC-BLYP20 - M06-2X |                   |                     |             |                   |                     |             |                   |             |                   |             |                      | -0.033               |

**Table S9.** Excited state data for compound **7** calculated using TD-DFT with the functionals mentioned in the table, 6-311G(d) as the basis set and cyclohexane for the PCM model.

|                    | 1st singlet state |                     |             | 2nd singlet state |                     |             | 1st triplet state |             | 2nd triplet state |             | $\Delta E_{T_1-T_2}$ | $\Delta E_{S_1-T_1}$ |
|--------------------|-------------------|---------------------|-------------|-------------------|---------------------|-------------|-------------------|-------------|-------------------|-------------|----------------------|----------------------|
|                    | Transition        | oscillator strength | Energy (eV) | Transition        | oscillator strength | Energy (eV) | Transition        | Energy (eV) | Transition        | Energy (eV) | Energy (eV)          | Energy (eV)          |
| RI-CC2             | 153 ->154         | 0.0938              | 1.923       | 152->154          | 0.0017              | 1.882       | 153->154          | 1.853       | 152->154          | 1.852       | 0.000                | 0.071                |
| BLYP               | 153 ->154         | 0.0862              | 1.012       | 152->154          | 0.0010              | 1.043       | 152 ->154         | 0.873       | 153 ->154         | 0.879       | 0.006                | 0.139                |
| BPW91              | 153 ->154         | 0.0886              | 1.009       | 152->154          | 0.0010              | 1.040       | 152 ->154         | 0.862       | 153 ->154         | 0.871       | 0.008                | 0.146                |
| PBE                | 153 ->154         | 0.0883              | 1.007       | 152->154          | 0.0009              | 1.037       | 152 ->154         | 0.859       | 153 ->154         | 0.868       | 0.009                | 0.148                |
| M06L               | 152 ->154         | 0.0851              | 1.210       | 153->154          | 0.0013              | 1.222       | 153 ->154         | 1.071       | 152 ->154         | 1.080       | 0.009                | 0.138                |
| TPSS               | 153 ->154         | 0.0892              | 1.058       | 152->154          | 0.0010              | 1.087       | 152 ->154         | 0.909       | 153 ->154         | 0.917       | 0.008                | 0.149                |
| TPSSh              | 153 ->154         | 0.0850              | 1.286       | 152->154          | 0.0014              | 1.297       | 153 ->154         | 1.139       | 152 ->154         | 1.142       | 0.003                | 0.146                |
| B3LYP              | 153 ->154         | 0.0823              | 1.497       | 152->154          | 0.0017              | 1.498       | 153 ->154         | 1.347       | 152 ->154         | 1.365       | 0.018                | 0.150                |
| B971               | 153 ->154         | 0.0835              | 1.523       | 152->154          | 0.0017              | 1.520       | 153 ->154         | 1.376       | 152 ->154         | 1.390       | 0.015                | 0.147                |
| PBE0               | 153 ->154         | 0.0854              | 1.624       | 152->154          | 0.0019              | 1.616       | 153 ->154         | 1.439       | 152 ->154         | 1.476       | 0.037                | 0.185                |
| M06                | 153 ->154         | 0.0801              | 1.717       | 152->154          | 0.0019              | 1.698       | 153 ->154         | 1.548       | 152 ->154         | 1.587       | 0.039                | 0.169                |
| M06-2X             | 153 ->154         | 0.0987              | 2.271       | 152->154          | 0.0022              | 2.215       | 153 ->154         | 2.002       | 152 ->154         | 2.098       | 0.096                | 0.268                |
| $\omega$ B97       | 153 ->154         | 0.1425              | 2.957       | 152->154          | 0.0024              | 2.883       | 144 ->154         | 1.885       | 152 ->154         | 2.615       | 0.730                | 1.071                |
| $\omega$ B97X      | 153 ->154         | 0.1264              | 2.739       | 152->154          | 0.0024              | 2.676       | 144 ->154         | 1.886       | 152 ->154         | 2.455       | 0.569                | 0.853                |
| CAM-B3LYP          | 153 ->154         | 0.1000              | 2.280       | 152->154          | 0.0023              | 2.247       | 153 ->154         | 1.814       | 152 ->154         | 2.092       | 0.279                | 0.467                |
| LC- $\omega$ PBE17 | 153 ->154         | 0.0892              | 1.709       | 153 ->154         | 0.0016              | 1.692       | 153 ->154         | 1.496       | 152 ->154         | 1.549       | 0.053                | 0.212                |
| LC-BLYP17          | 153 ->154         | 0.0879              | 1.702       | 152->154          | 0.0017              | 1.687       | 153 ->154         | 1.514       | 152 ->154         | 1.555       | 0.041                | 0.188                |
| LC-BLYP20          | 153 ->154         | 0.0924              | 1.899       | 152->154          | 0.0018              | 1.873       | 153 ->154         | 1.660       | 152 ->154         | 1.734       | 0.074                | 0.239                |
| LC-BLYP33          | 153 ->154         | 0.1200              | 2.613       | 152->154          | 0.0022              | 2.554       | 144 ->154         | 1.916       | 152 ->154         | 2.345       | 0.429                | 0.697                |
| LC-BLYP            | 153 ->154         | 0.1530              | 3.110       | 152->154          | 0.0027              | 3.036       | 144 ->154         | 1.763       | 152 ->154         | 2.687       | 0.924                | 1.347                |
| LC-BLYP20 - M06-2X |                   |                     |             |                   |                     |             |                   |             |                   |             |                      | -0.104               |

**Table S10.** Excited state data for compound **8** calculated using TD-DFT with the functionals mentioned in the table, 6-311G(d) as the basis set and cyclohexane for the PCM model.

|                    | 1st singlet state |                     |             | 2nd singlet state |                     |             | 1st triplet state |             | 2nd triplet state |             | $\Delta E_{T_1-T_2}$ | $\Delta E_{S_1-T_1}$ |
|--------------------|-------------------|---------------------|-------------|-------------------|---------------------|-------------|-------------------|-------------|-------------------|-------------|----------------------|----------------------|
|                    | Transition        | oscillator strength | Energy (eV) | Transition        | oscillator strength | Energy (eV) | Transition        | Energy (eV) | Transition        | Energy (eV) | Energy (eV)          | Energy (eV)          |
| RI-CC2             | 179 ->180         | 0.0833              | 3.076       | 178->180          | 0.0049              | 3.150       | 177 ->180         | 2.575       | 165 ->180         | 2.961       | 0.386                | 0.501                |
| BLYP               | 179 ->180         | 0.0070              | 1.762       | 178->180          | 0.0009              | 1.801       | 179 ->180         | 1.736       | 178 ->180         | 1.785       | 0.050                | 0.027                |
| BPW91              | 179 ->180         | 0.0076              | 1.768       | 178->180          | 0.0009              | 1.806       | 179 ->180         | 1.738       | 178 ->180         | 1.788       | 0.050                | 0.030                |
| PBE                | 179 ->180         | 0.0074              | 1.773       | 178->180          | 0.0009              | 1.810       | 179 ->180         | 1.744       | 178 ->180         | 1.744       | 0.000                | 0.029                |
| M06L               | 179 ->180         | 0.0094              | 1.958       | 178->180          | 0.0010              | 2.000       | 179 ->180         | 1.887       | 178 ->180         | 1.981       | 0.094                | 0.071                |
| TPSS               | 179 ->180         | 0.0084              | 1.855       | 178->180          | 0.0010              | 1.895       | 179 ->180         | 1.814       | 178 ->180         | 1.876       | 0.062                | 0.042                |
| TPSSh              | 179 ->180         | 0.0121              | 2.157       | 178->180          | 0.0014              | 2.203       | 177 ->180         | 1.958       | 179 ->180         | 2.141       | 0.184                | 0.200                |
| B3LYP              | 179 ->180         | 0.0175              | 2.376       | 178->180          | 0.0021              | 2.428       | 177 ->180         | 2.027       | 179 ->180         | 2.329       | 0.302                | 0.349                |
| B971               | 179 ->180         | 0.0194              | 2.426       | 178->180          | 0.0023              | 2.479       | 177 ->180         | 2.076       | 179 ->180         | 2.380       | 0.304                | 0.350                |
| PBE0               | 179 ->180         | 0.0239              | 2.542       | 178->180          | 0.0028              | 2.597       | 177 ->180         | 1.989       | 179 ->180         | 2.417       | 0.428                | 0.552                |
| M06                | 179 ->180         | 0.0251              | 2.504       | 178->180          | 0.0029              | 2.561       | 177 ->180         | 1.998       | 179 ->180         | 2.390       | 0.393                | 0.506                |
| M06-2X             | 179 ->180         | 0.1645              | 3.236       | 178->180          | 0.0141              | 3.321       | 177 ->180         | 2.430       | 179 ->181         | 2.946       | 0.516                | 0.806                |
| $\omega$ B97       | 179 ->180         | 0.2725              | 3.641       | 178->180          | 0.2985              | 3.835       | 177 ->180         | 1.921       | 179 ->181         | 2.459       | 0.537                | 1.720                |
| $\omega$ B97X      | 179 ->180         | 0.2532              | 3.529       | 178->180          | 0.0540              | 3.748       | 177 ->180         | 2.003       | 179 ->181         | 2.526       | 0.523                | 1.526                |
| CAM-B3LYP          | 179 ->180         | 0.2020              | 3.238       | 179 ->180         | 0.0002              | 3.375       | 177 ->180         | 1.991       | 179 ->181         | 2.507       | 0.516                | 1.247                |
| LC- $\omega$ PBE17 | 179 ->180         | 0.0994              | 2.904       | 178->180          | 0.0052              | 2.940       | 177 ->180         | 2.173       | 173->180          | 2.580       | 0.407                | 0.731                |
| LC-BLYP17          | 179 ->180         | 0.0879              | 2.870       | 178->180          | 0.0065              | 2.925       | 177 ->180         | 2.221       | 173->180          | 2.637       | 0.416                | 0.649                |
| LC-BLYP20          | 179 ->180         | 0.1639              | 3.065       | 178->180          | 0.0075              | 3.129       | 177 ->180         | 2.252       | 179 ->181         | 2.703       | 0.452                | 0.814                |
| LC-BLYP33          | 179 ->180         | 0.2493              | 3.508       | 178->180          | 0.0132              | 3.646       | 177 ->180         | 2.128       | 179 ->181         | 2.601       | 0.473                | 1.381                |
| LC-BLYP            | 179 ->180         | 0.2836              | 3.684       | 178->180          | 0.5888              | 3.892       | 177 ->180         | 1.629       | 179 ->181         | 2.213       | 0.585                | 2.056                |
| LC-BLYP20 - M06-2X |                   |                     |             |                   |                     |             |                   |             |                   |             |                      | 0.635                |

**Table S11.** Excited state data for compound **9** calculated using TD-DFT with the functionals mentioned in the table, 6-311G(d) as the basis set and cyclohexane for the PCM model.

|                    | 1st singlet state |                     |             | 2nd singlet state |                     |             | 1st triplet state |             | 2nd triplet state |             | $\Delta E_{T_1-T_2}$ | $\Delta E_{S_1-T_1}$ |
|--------------------|-------------------|---------------------|-------------|-------------------|---------------------|-------------|-------------------|-------------|-------------------|-------------|----------------------|----------------------|
|                    | Transition        | oscillator strength | Energy (eV) | Transition        | oscillator strength | Energy (eV) | Transition        | Energy (eV) | Transition        | Energy (eV) | Energy (eV)          | Energy (eV)          |
| RI-CC2             | 118->119          | 1.0105              | 2.692       | 116->119          | 0.5851              | 3.488       | 118->119          | 2.159       | 116->119          | 2.809       | 0.651                | 0.534                |
| BLYP               | 118->119          | 0.5002              | 1.613       | 117->119          | 0.0000              | 1.796       | 118->119          | 1.352       | 117->119          | 1.782       | 0.431                | 0.262                |
| BPW91              | 118->119          | 0.5062              | 1.624       | 117->119          | 0.0000              | 1.816       | 118->119          | 1.355       | 117->119          | 1.801       | 0.445                | 0.269                |
| PBE                | 118->119          | 0.5063              | 1.625       | 117->119          | 0.0000              | 1.820       | 118->119          | 1.357       | 117->119          | 1.805       | 0.448                | 0.268                |
| M06L               | 118->119          | 0.5225              | 1.761       | 117->119          | 0.0000              | 1.957       | 118->119          | 1.470       | 116->119          | 1.872       | 0.402                | 0.291                |
| TPSS               | 118->119          | 0.5219              | 1.675       | 117->119          | 0.0000              | 1.879       | 118->119          | 1.393       | 116->119          | 1.818       | 0.425                | 0.282                |
| TPSSh              | 118->119          | 0.5886              | 1.935       | 117->119          | 0.0000              | 2.226       | 118->119          | 1.544       | 116->119          | 1.949       | 0.406                | 0.391                |
| B3LYP              | 118->119          | 0.6944              | 2.153       | 117->119          | 0.0000              | 2.513       | 118->119          | 1.640       | 116->119          | 2.149       | 0.509                | 0.512                |
| B971               | 118->119          | 0.7180              | 2.189       | 117->119          | 0.0001              | 2.566       | 118->119          | 1.683       | 116->119          | 2.195       | 0.512                | 0.505                |
| PBE0               | 118->119          | 0.7894              | 2.304       | 117->119          | 0.0001              | 2.729       | 116->119          | 1.603       | 116->119          | 2.247       | 0.644                | 0.701                |
| M06                | 118->119          | 0.8144              | 2.339       | 117->119          | 0.0001              | 2.742       | 116->119          | 1.668       | 116->119          | 2.320       | 0.651                | 0.671                |
| M06-2X             | 118->119          | 1.3958              | 2.870       | 116->119          | 0.4123              | 3.631       | 118->119          | 1.956       | 116->119          | 2.820       | 0.865                | 0.915                |
| $\omega$ B97       | 118->119          | 1.8454              | 3.317       | 116->119          | 0.1245              | 4.327       | 116->119          | 1.522       | 115->119          | 2.772       | 1.250                | 1.795                |
| $\omega$ B97X      | 118->119          | 1.8107              | 3.227       | 116->119          | 0.1233              | 4.176       | 116->119          | 1.592       | 115->119          | 2.782       | 1.190                | 1.635                |
| CAM-B3LYP          | 118->119          | 1.5167              | 2.933       | 116->119          | 0.3071              | 3.696       | 116->119          | 1.609       | 114->119          | 2.666       | 1.057                | 1.324                |
| LC- $\omega$ PBE17 | 118->119          | 1.3586              | 2.700       | 116->119          | 0.1894              | 3.303       | 116->119          | 1.698       | 116->119          | 2.547       | 0.849                | 1.002                |
| LC-BLYP17          | 118->119          | 1.3483              | 2.678       | 116->119          | 0.1989              | 3.286       | 116->119          | 1.772       | 116->119          | 2.577       | 0.804                | 0.906                |
| LC-BLYP20          | 118->119          | 1.4964              | 2.819       | 116->119          | 0.1507              | 3.477       | 116->119          | 1.778       | 115->119          | 2.662       | 0.884                | 1.041                |
| LC-BLYP33          | 118->119          | 1.7685              | 3.185       | 116->119          | 0.1206              | 4.094       | 116->119          | 1.663       | 115->119          | 2.775       | 1.112                | 1.522                |
| LC-BLYP            | 118->119          | 1.8646              | 3.368       | 116->119          | 0.1308              | 4.447       | 116->119          | 1.337       | 114->119          | 2.668       | 1.331                | 2.031                |
| LC-BLYP20 - M06-2X |                   |                     |             |                   |                     |             |                   |             |                   |             |                      | 0.864                |

**Table S12.** Excited state data for compound **10** calculated using TD-DFT with the functionals mentioned in the table, 6-311G(d) as the basis set and cyclohexane for the PCM model.

|                    | 1st singlet state |                     |             | 2nd singlet state |                     |             | 1st triplet state |             | 2nd triplet state |             | $\Delta E_{T_1-T_2}$ | $\Delta E_{S_1-T_1}$ |
|--------------------|-------------------|---------------------|-------------|-------------------|---------------------|-------------|-------------------|-------------|-------------------|-------------|----------------------|----------------------|
|                    | Transition        | oscillator strength | Energy (eV) | Transition        | oscillator strength | Energy (eV) | Transition        | Energy (eV) | Transition        | Energy (eV) | Energy (eV)          | Energy (eV)          |
| RI-CC2             | 151->152          | 0.0323              | 3.022       | 150->152          | 0.0104              | 3.031       | 151->152          | 3.010       | 150->152          | 3.019       | 0.009                | 0.012                |
| BLYP               | 151->152          | 0.0222              | 1.681       | 150->152          | 0.0075              | 1.692       | 151->152          | 1.664       | 150->152          | 1.668       | 0.004                | 0.017                |
| BPW91              | 151->152          | 0.0222              | 1.680       | 150->152          | 0.0074              | 1.691       | 151->152          | 1.661       | 150->152          | 1.665       | 0.004                | 0.019                |
| PBE                | 151->152          | 0.0223              | 1.662       | 150->152          | 0.0071              | 1.673       | 151->152          | 1.643       | 150->152          | 1.647       | 0.004                | 0.019                |
| M06L               | 151->152          | 0.0213              | 1.971       | 150->152          | 0.0072              | 1.980       | 151->152          | 1.954       | 150->152          | 1.957       | 0.004                | 0.018                |
| TPSS               | 151->152          | 0.0227              | 1.771       | 150->152          | 0.0076              | 1.781       | 151->152          | 1.751       | 150->152          | 1.755       | 0.004                | 0.020                |
| TPSSh              | 151->152          | 0.0226              | 2.178       | 150->152          | 0.0076              | 2.188       | 151->152          | 2.152       | 150->152          | 2.158       | 0.005                | 0.025                |
| B3LYP              | 151->152          | 0.0244              | 2.496       | 150->152          | 0.0084              | 2.506       | 151->152          | 2.466       | 150->152          | 2.473       | 0.007                | 0.030                |
| B971               | 151->152          | 0.0249              | 2.531       | 150->152          | 0.0086              | 2.541       | 151->152          | 2.502       | 150->152          | 2.509       | 0.007                | 0.029                |
| PBE0               | 151->152          | 0.0262              | 2.670       | 150->152          | 0.0091              | 2.680       | 151->152          | 2.628       | 150->152          | 2.638       | 0.010                | 0.042                |
| M06                | 151->152          | 0.0258              | 2.755       | 150->152          | 0.0088              | 2.765       | 151->152          | 2.719       | 150->152          | 2.731       | 0.012                | 0.036                |
| M06-2X             | 151->152          | 0.0359              | 3.420       | 150->152          | 0.0118              | 3.431       | 150->156          | 3.279       | 151->156          | 3.279       | 0.000                | 0.141                |
| $\omega$ B97       | 151->152          | 0.0677              | 4.206       | 150->152          | 0.0092              | 4.223       | 151->156          | 2.863       | 150->156          | 2.863       | 0.000                | 1.343                |
| $\omega$ B97X      | 151->152          | 0.0546              | 4.039       | 150->152          | 0.0135              | 4.055       | 151->156          | 2.945       | 150->156          | 2.945       | 0.000                | 1.095                |
| CAM-B3LYP          | 151->152          | 0.0377              | 3.515       | 150->152          | 0.0124              | 3.527       | 151->156          | 2.887       | 150->156          | 2.887       | 0.000                | 0.628                |
| LC- $\omega$ PBE17 | 151->152          | 0.0314              | 2.951       | 150->152          | 0.0116              | 2.962       | 150->156          | 2.866       | 151->156          | 2.867       | 0.001                | 0.085                |
| LC-BLYP17          | 151->152          | 0.0311              | 2.919       | 150->152          | 0.0112              | 2.930       | 151->152          | 2.868       | 150->152          | 2.875       | 0.008                | 0.051                |
| LC-BLYP20          | 151->152          | 0.0341              | 3.159       | 150->152          | 0.0118              | 3.170       | 151->156          | 2.974       | 150->156          | 2.974       | 0.000                | 0.185                |
| LC-BLYP33          | 151->152          | 0.0507              | 3.890       | 150->152          | 0.0135              | 3.904       | 151->156          | 2.952       | 150->156          | 2.952       | 0.000                | 0.938                |
| LC-BLYP            | 151->152          | 0.0874              | 4.339       | 150->152          | 0.0035              | 4.348       | 151->156          | 2.638       | 150->156          | 2.638       | 0.000                | 1.701                |
| LC-BLYP20 - M06-2X |                   |                     |             |                   |                     |             |                   |             |                   |             |                      | -0.120               |

**Table S13.** Excited state data for compound **1** calculated using TD-DFT/TDA with the functionals mentioned in the table, 6-311G(d) as the basis set and cyclohexane for the PCM model.

|                    | 1st singlet state |                     |             | 2nd singlet state |                     |             | 1st triplet state |             | 2nd triplet state |             | $\Delta E_{T_1-T_2}$ | $\Delta E_{S_1-T_1}$ |
|--------------------|-------------------|---------------------|-------------|-------------------|---------------------|-------------|-------------------|-------------|-------------------|-------------|----------------------|----------------------|
|                    | Transition        | oscillator strength | Energy (eV) | Transition        | oscillator strength | Energy (eV) | Transition        | Energy (eV) | Transition        | Energy (eV) | Energy (eV)          | Energy (eV)          |
| RI-CC2             | 180->181          | 0.1704              | 2.969       | 179->181          | 0.0980              | 2.996       | 180->181          | 2.903       | 179->181          | 2.948       | 0.045                | 0.067                |
| BLYP               | 180->181          | 0.1309              | 1.515       | 179->181          | 0.0645              | 1.446       | 180->181          | 1.378       | 179->181          | 1.393       | 0.014                | 0.137                |
| BPW91              | 180->181          | 0.1345              | 1.516       | 179->181          | 0.0670              | 1.443       | 180->181          | 1.374       | 179->181          | 1.387       | 0.013                | 0.142                |
| PBE                | 180->181          | 0.1344              | 1.517       | 179->181          | 0.0669              | 1.443       | 180->181          | 1.376       | 179->181          | 1.387       | 0.011                | 0.141                |
| M06L               | 180->181          | 0.1293              | 1.707       | 179->181          | 0.0628              | 1.654       | 180->181          | 1.582       | 179->181          | 1.605       | 0.023                | 0.125                |
| TPSS               | 180->181          | 0.1345              | 1.588       | 179->181          | 0.0668              | 1.522       | 180->181          | 1.450       | 179->181          | 1.467       | 0.016                | 0.138                |
| TPSSh              | 180->181          | 0.1388              | 1.948       | 179->181          | 0.0669              | 1.913       | 180->181          | 1.823       | 179->181          | 1.860       | 0.037                | 0.125                |
| B3LYP              | 180->181          | 0.1479              | 2.264       | 179->181          | 0.0692              | 2.256       | 180->181          | 2.142       | 179->181          | 2.201       | 0.059                | 0.121                |
| B971               | 180->181          | 0.1518              | 2.311       | 179->181          | 0.0713              | 2.304       | 180->181          | 2.189       | 179->181          | 2.248       | 0.059                | 0.122                |
| PBE0               | 180->181          | 0.1609              | 2.461       | 179->181          | 0.0761              | 2.462       | 180->181          | 2.330       | 179->181          | 2.396       | 0.067                | 0.132                |
| M06                | 180->181          | 0.1595              | 2.525       | 179->181          | 0.0746              | 2.534       | 180->181          | 2.399       | 179->181          | 2.473       | 0.075                | 0.127                |
| M06-2X             | 180->181          | 0.2461              | 3.440       | 179->181          | 0.1322              | 3.449       | 179->181          | 3.224       | 180->181          | 3.239       | 0.015                | 0.216                |
| $\omega$ B97       | 180->181          | 0.5093              | 4.334       | 179->181          | 0.0849              | 4.096       | 169->181          | 3.401       | 166->181          | 3.555       | 0.154                | 0.933                |
| $\omega$ B97X      | 180->181          | 0.4619              | 4.149       | 179->181          | 0.0987              | 3.981       | 169->181          | 3.387       | 166->181          | 3.468       | 0.081                | 0.762                |
| CAM-B3LYP          | 180->181          | 0.2773              | 3.496       | 179->181          | 0.1467              | 3.538       | 180->181          | 3.222       | 179->181          | 3.251       | 0.030                | 0.275                |
| LC- $\omega$ PBE17 | 180->181          | 0.2252              | 3.010       | 179->181          | 0.1064              | 2.999       | 177->181          | 2.747       | 180->181          | 2.812       | 0.065                | 0.263                |
| LC-BLYP17          | 180->181          | 0.2289              | 2.990       | 179->181          | 0.1115              | 2.995       | 179->181          | 2.780       | 180->181          | 2.797       | 0.017                | 0.210                |
| LC-BLYP20          | 180->181          | 0.2672              | 3.271       | 179->181          | 0.1163              | 3.246       | 179->181          | 2.925       | 180->181          | 3.029       | 0.104                | 0.346                |
| LC-BLYP33          | 180->181          | 0.4327              | 4.060       | 179->181          | 0.0883              | 3.859       | 173->181          | 3.337       | 168->181          | 3.394       | 0.056                | 0.723                |
| LC-BLYP            | 180->181          | 0.5403              | 4.450       | 179->181          | 0.0968              | 4.234       | 168->181          | 3.326       | 180->183          | 3.515       | 0.189                | 1.124                |
| LC-BLYP20 - M06-2X |                   |                     |             |                   |                     |             |                   |             |                   |             |                      | 0.047                |

**Table S14.** Excited state data for compound **2** calculated using TD-DFT/TDA with the functionals mentioned in the table, 6-311G(d) as the basis set and cyclohexane for the PCM model.

|                    | 1st singlet state |                     |             | 2nd singlet state |                     |             | 1st triplet state |             | 2nd triplet state |             | $\Delta E_{T_1-T_2}$ | $\Delta E_{S_1-T_1}$ |
|--------------------|-------------------|---------------------|-------------|-------------------|---------------------|-------------|-------------------|-------------|-------------------|-------------|----------------------|----------------------|
|                    | Transition        | oscillator strength | Energy (eV) | Transition        | oscillator strength | Energy (eV) | Transition        | Energy (eV) | Transition        | Energy (eV) | Energy (eV)          | Energy (eV)          |
| RI-CC2             | 176->177          | 0.1571              | 3.468       | 175->177          | 0.1306              | 3.496       | 176->177          | 3.337       | 175->177          | 3.354       | 0.016                | 0.130                |
| BLYP               | 176->177          | 0.0855              | 1.978       | 175->177          | 0.0485              | 1.942       | 176->177          | 1.883       | 175->177          | 1.905       | 0.022                | 0.095                |
| BPW91              | 176->177          | 0.0875              | 1.983       | 175->177          | 0.0502              | 1.944       | 176->177          | 1.885       | 175->177          | 1.905       | 0.020                | 0.098                |
| PBE                | 176->177          | 0.0873              | 1.986       | 175->177          | 0.0501              | 1.946       | 176->177          | 1.888       | 175->177          | 1.906       | 0.018                | 0.098                |
| M06L               | 176->177          | 0.0893              | 2.206       | 175->177          | 0.0494              | 2.179       | 176->177          | 2.112       | 175->177          | 2.141       | 0.030                | 0.095                |
| TPSS               | 176->177          | 0.0895              | 2.059       | 175->177          | 0.0510              | 2.023       | 176->177          | 1.960       | 175->177          | 1.983       | 0.023                | 0.099                |
| TPSSh              | 176->177          | 0.1031              | 2.448       | 175->177          | 0.0582              | 2.433       | 176->177          | 2.339       | 175->177          | 2.383       | 0.045                | 0.109                |
| B3LYP              | 176->177          | 0.1206              | 2.770       | 175->177          | 0.0686              | 2.777       | 176->177          | 2.642       | 175->177          | 2.712       | 0.070                | 0.128                |
| B971               | 176->177          | 0.1251              | 2.825       | 175->177          | 0.0719              | 2.832       | 176->177          | 2.694       | 175->177          | 2.764       | 0.070                | 0.131                |
| PBE0               | 176->177          | 0.1378              | 2.977       | 175->177          | 0.0809              | 2.989       | 176->177          | 2.818       | 175->177          | 2.893       | 0.075                | 0.159                |
| M06                | 176->177          | 0.1419              | 3.014       | 175->177          | 0.0826              | 3.032       | 176->177          | 2.854       | 175->177          | 2.944       | 0.090                | 0.160                |
| M06-2X             | 176->177          | 0.2686              | 3.904       | 175->177          | 0.1456              | 3.834       | 175->177          | 3.431       | 176->177          | 3.519       | 0.088                | 0.474                |
| $\omega$ B97       | 176->177          | 0.5623              | 4.513       | 175->177          | 0.0732              | 4.275       | 173->177          | 3.582       | 176->179          | 3.585       | 0.003                | 0.931                |
| $\omega$ B97X      | 176->177          | 0.5034              | 4.393       | 175->177          | 0.0813              | 4.179       | 176->179          | 3.561       | 172->177          | 3.561       | 0.000                | 0.832                |
| CAM-B3LYP          | 176->177          | 0.3093              | 3.930       | 175->177          | 0.1876              | 3.927       | 176->177          | 3.404       | 175->177          | 3.431       | 0.027                | 0.526                |
| LC- $\omega$ PBE17 | 176->177          | 0.2259              | 3.471       | 175->177          | 0.4800              | 3.400       | 174->177          | 2.984       | 176->177          | 3.128       | 0.144                | 0.488                |
| LC-BLYP17          | 176->177          | 0.2210              | 3.442       | 175->177          | 0.1276              | 3.404       | 173->177          | 3.031       | 176->177          | 3.121       | 0.090                | 0.411                |
| LC-BLYP20          | 176->177          | 0.2657              | 3.688       | 175->177          | 0.1072              | 3.581       | 173->177          | 3.130       | 176->177          | 3.260       | 0.130                | 0.558                |
| LC-BLYP33          | 176->177          | 0.4560              | 4.303       | 175->177          | 0.0763              | 4.064       | 173->177          | 3.475       | 176->179          | 3.511       | 0.036                | 0.828                |
| LC-BLYP            | 176->177          | 0.5890              | 4.609       | 175->177          | 0.0828              | 4.394       | 169->177          | 3.503       | 176->179          | 3.534       | 0.031                | 1.106                |
| LC-BLYP20 - M06-2X |                   |                     |             |                   |                     |             |                   |             |                   |             |                      | 0.257                |



**Table S15.** Excited state data for compound **3** calculated using TD-DFT/TDA with the functionals mentioned in the table, 6-311G(d) as the basis set and cyclohexane for the PCM model.

|                    | 1st singlet state |                     |             | 2nd singlet state |                     |             | 1st triplet state |             | 2nd triplet state |             | $\Delta E_{T_1-T_2}$ | $\Delta E_{S_1-T_1}$ |
|--------------------|-------------------|---------------------|-------------|-------------------|---------------------|-------------|-------------------|-------------|-------------------|-------------|----------------------|----------------------|
|                    | Transition        | oscillator strength | Energy (eV) | Transition        | oscillator strength | Energy (eV) | Transition        | Energy (eV) | Transition        | Energy (eV) | Energy (eV)          | Energy (eV)          |
| RI-CC2             | 123->124          | 0.2307              | 2.474       | 122->124          | 0.0083              | 3.355       | 123->124          | 2.081       | 122->124          | 3.256       | 1.175                | 0.393                |
| BLYP               | 123->124          | 0.1609              | 1.642       | 122->124          | 0.0056              | 2.238       | 123->124          | 1.312       | 122->124          | 2.043       | 0.731                | 0.330                |
| BPW91              | 123->124          | 0.1670              | 1.665       | 122->124          | 0.0057              | 2.267       | 123->124          | 1.325       | 122->124          | 2.063       | 0.738                | 0.340                |
| PBE                | 123->124          | 0.1674              | 1.662       | 122->124          | 0.0059              | 2.265       | 123->124          | 1.324       | 122->124          | 2.061       | 0.737                | 0.338                |
| M06L               | 123->124          | 0.1791              | 1.842       | 122->124          | 0.0052              | 2.459       | 123->124          | 1.469       | 122->124          | 2.265       | 0.796                | 0.373                |
| TPSS               | 123->124          | 0.1677              | 1.698       | 122->124          | 0.0056              | 2.310       | 123->124          | 1.342       | 122->124          | 2.105       | 0.763                | 0.356                |
| TPSSh              | 123->124          | 0.1921              | 1.919       | 122->124          | 0.0056              | 2.591       | 123->124          | 1.494       | 122->124          | 2.377       | 0.883                | 0.425                |
| B3LYP              | 123->124          | 0.2116              | 2.091       | 122->124          | 0.0056              | 2.812       | 123->124          | 1.617       | 122->124          | 2.595       | 0.979                | 0.474                |
| B971               | 123->124          | 0.2185              | 2.123       | 122->124          | 0.0058              | 2.855       | 123->124          | 1.651       | 122->124          | 2.639       | 0.988                | 0.472                |
| PBE0               | 123->124          | 0.2337              | 2.219       | 122->124          | 0.0060              | 2.980       | 123->124          | 1.681       | 122->124          | 2.740       | 1.060                | 0.538                |
| M06                | 123->124          | 0.2335              | 2.254       | 122->124          | 0.0050              | 3.008       | 123->124          | 1.735       | 122->124          | 2.795       | 1.060                | 0.519                |
| M06-2X             | 123->124          | 0.3314              | 2.725       | 122->124          | 0.0093              | 3.669       | 123->124          | 2.065       | 122->124          | 3.367       | 1.302                | 0.661                |
| $\omega$ B97       | 123->124          | 0.4082              | 3.137       | 122->124          | 0.0233              | 4.277       | 123->124          | 2.137       | 114->124          | 3.460       | 1.323                | 0.999                |
| $\omega$ B97X      | 123->124          | 0.3779              | 3.013       | 122->124          | 0.0171              | 4.114       | 123->124          | 2.091       | 114->124          | 3.464       | 1.373                | 0.922                |
| CAM-B3LYP          | 123->124          | 0.3089              | 2.688       | 122->124          | 0.0089              | 3.651       | 123->124          | 1.925       | 122->124          | 3.299       | 1.374                | 0.763                |
| LC- $\omega$ PBE17 | 123->124          | 0.2503              | 2.302       | 122->124          | 0.0072              | 3.180       | 123->124          | 1.748       | 122->124          | 2.889       | 1.141                | 0.554                |
| LC-BLYP17          | 123->124          | 0.2446              | 2.280       | 122->124          | 0.0071              | 3.157       | 123->124          | 1.755       | 122->124          | 2.881       | 1.126                | 0.525                |
| LC-BLYP20          | 123->124          | 0.2806              | 2.467       | 122->124          | 0.0085              | 3.395       | 123->124          | 1.837       | 122->124          | 3.064       | 1.227                | 0.630                |
| LC-BLYP33          | 123->124          | 0.3771              | 2.947       | 122->124          | 0.0168              | 4.018       | 123->124          | 2.066       | 114->124          | 3.416       | 1.350                | 0.881                |
| LC-BLYP            | 123->124          | 0.4245              | 3.229       | 122->124          | 0.0317              | 4.404       | 123->124          | 2.111       | 114->124          | 3.417       | 1.305                | 1.118                |
| LC-BLYP20 - M06-2X |                   |                     |             |                   |                     |             |                   |             |                   |             |                      | 0.402                |

**Table S16.** Excited state data for compound **4** calculated using TD-DFT/TDA with the functionals mentioned in the table, 6-311G(d) as the basis set and cyclohexane for the PCM model.

|                    | 1st singlet state |                     |             | 2nd singlet state |                     |             | 1st triplet state |             | 2nd triplet state |             | $\Delta E_{T_1-T_2}$ | $\Delta E_{S_1-T_1}$ |
|--------------------|-------------------|---------------------|-------------|-------------------|---------------------|-------------|-------------------|-------------|-------------------|-------------|----------------------|----------------------|
|                    | Transition        | oscillator strength | Energy (eV) | Transition        | oscillator strength | Energy (eV) | Transition        | Energy (eV) | Transition        | Energy (eV) | Energy (eV)          | Energy (eV)          |
| RI-CC2             | 145->146          | 0.0000              | 2.456       | 144->146          | 0.0000              | 2.525       | 145->146          | 2.457       | 144->146          | 2.527       | 0.069                | -0.002               |
| BLYP               | 145->146          | 0.0000              | 1.144       | 144->146          | 0.0000              | 1.185       | 145->146          | 1.138       | 144->146          | 1.177       | 0.040                | 0.007                |
| BPW91              | 145->146          | 0.0000              | 1.153       | 144->146          | 0.0000              | 1.194       | 145->146          | 1.145       | 144->146          | 1.186       | 0.041                | 0.008                |
| PBE                | 145->146          | 0.0000              | 1.149       | 144->146          | 0.0000              | 1.191       | 145->146          | 1.141       | 144->146          | 1.183       | 0.041                | 0.008                |
| M06L               | 145->146          | 0.0000              | 1.396       | 144->146          | 0.0000              | 1.439       | 145->146          | 1.389       | 144->146          | 1.431       | 0.042                | 0.007                |
| TPSS               | 145->146          | 0.0000              | 1.203       | 144->146          | 0.0000              | 1.247       | 145->146          | 1.195       | 144->146          | 1.238       | 0.043                | 0.008                |
| TPSSh              | 145->146          | 0.0000              | 1.518       | 144->146          | 0.0000              | 1.564       | 145->146          | 1.509       | 144->146          | 1.554       | 0.045                | 0.009                |
| B3LYP              | 145->146          | 0.0000              | 1.780       | 144->146          | 0.0000              | 1.826       | 145->146          | 1.771       | 144->146          | 1.816       | 0.045                | 0.009                |
| B971               | 145->146          | 0.0000              | 1.819       | 144->146          | 0.0000              | 1.866       | 145->146          | 1.810       | 144->146          | 1.857       | 0.047                | 0.009                |
| PBE0               | 145->146          | 0.0000              | 1.942       | 144->146          | 0.0000              | 1.991       | 145->146          | 1.931       | 144->146          | 1.979       | 0.048                | 0.012                |
| M06                | 145->146          | 0.0000              | 2.040       | 144->146          | 0.0000              | 2.084       | 145->146          | 2.033       | 144->146          | 2.077       | 0.044                | 0.006                |
| M06-2X             | 145->146          | 0.0000              | 2.693       | 144->146          | 0.0000              | 2.750       | 145->146          | 2.682       | 144->146          | 2.740       | 0.058                | 0.011                |
| $\omega$ B97       | 145->146          | 0.0000              | 3.440       | 144->146          | 0.0000              | 3.508       | 139->146          | 2.747       | 136->146          | 3.382       | 0.635                | 0.692                |
| $\omega$ B97X      | 145->146          | 0.0000              | 3.239       | 144->146          | 0.0000              | 3.304       | 139->146          | 2.728       | 145->146          | 3.215       | 0.486                | 0.511                |
| CAM-B3LYP          | 145->146          | 0.0000              | 2.694       | 144->146          | 0.0000              | 2.749       | 145->146          | 2.677       | 144->146          | 2.733       | 0.056                | 0.017                |
| LC- $\omega$ PBE17 | 145->146          | 0.0000              | 2.161       | 144->146          | 0.0000              | 2.216       | 145->146          | 2.145       | 144->146          | 2.201       | 0.055                | 0.015                |
| LC-BLYP17          | 145->146          | 0.0000              | 2.151       | 144->146          | 0.0000              | 2.206       | 145->146          | 2.137       | 144->146          | 2.193       | 0.055                | 0.013                |
| LC-BLYP20          | 145->146          | 0.0000              | 2.388       | 144->146          | 0.0000              | 2.445       | 145->146          | 2.372       | 144->146          | 2.430       | 0.058                | 0.016                |
| LC-BLYP33          | 145->146          | 0.0000              | 3.123       | 144->146          | 0.0000              | 3.184       | 139->146          | 2.757       | 145->146          | 3.098       | 0.341                | 0.366                |
| LC-BLYP            | 145->146          | 0.0000              | 3.576       | 144->146          | 0.0000              | 3.637       | 139->146          | 2.679       | 136->146          | 3.333       | 0.654                | 0.897                |
| LC-BLYP20 - M06-2X |                   |                     |             |                   |                     |             |                   |             |                   |             |                      | -0.294               |

**Table S17.** Excited state data for compound **5** calculated using TD-DFT/TDA with the functionals mentioned in the table, 6-311G(d) as the basis set and cyclohexane for the PCM model.

|                    | 1st singlet state |                     |             | 2nd singlet state |                     |             | 1st triplet state |             | 2nd triplet state |             | $\Delta E_{T_1-T_2}$ | $\Delta E_{S_1-T_1}$ |
|--------------------|-------------------|---------------------|-------------|-------------------|---------------------|-------------|-------------------|-------------|-------------------|-------------|----------------------|----------------------|
|                    | Transition        | oscillator strength | Energy (eV) | Transition        | oscillator strength | Energy (eV) | Transition        | Energy (eV) | Transition        | Energy (eV) | Energy (eV)          | Energy (eV)          |
| RI-CC2             | 123 ->124         | 0.3962              | 3.524       | 115->124          | 0.0037              | 3.718       | 123->124          | 3.227       | 115->124          | 3.411       | 0.185                | 0.297                |
| BLYP               | 123 ->124         | 0.2024              | 2.103       | 122 ->124         | 0.0000              | 2.445       | 123 ->124         | 1.918       | 122 ->124         | 2.430       | 0.513                | 0.185                |
| BPW91              | 123 ->124         | 0.2052              | 2.105       | 122 ->124         | 0.0000              | 2.457       | 123 ->124         | 1.916       | 122 ->124         | 2.441       | 0.525                | 0.190                |
| PBE                | 123 ->124         | 0.2057              | 2.109       | 122 ->124         | 0.0000              | 2.464       | 123 ->124         | 1.919       | 122 ->124         | 2.449       | 0.529                | 0.190                |
| M06L               | 123 ->124         | 0.2059              | 2.339       | 122 ->124         | 0.0000              | 2.708       | 123 ->124         | 2.157       | 122 ->124         | 2.691       | 0.534                | 0.182                |
| TPSS               | 123 ->124         | 0.2097              | 2.195       | 122 ->124         | 0.0000              | 2.558       | 123 ->124         | 2.003       | 122 ->124         | 2.541       | 0.538                | 0.192                |
| TPSSh              | 123 ->124         | 0.2409              | 2.571       | 122 ->124         | 0.0000              | 2.996       | 123 ->124         | 2.351       | 122 ->124         | 2.968       | 0.617                | 0.219                |
| B3LYP              | 123 ->124         | 0.2770              | 2.862       | 122 ->124         | 0.0000              | 3.334       | 123 ->124         | 2.605       | 120 ->124         | 3.113       | 0.508                | 0.257                |
| B971               | 123 ->124         | 0.2847              | 2.911       | 122 ->124         | 0.0000              | 3.398       | 123 ->124         | 2.654       | 120 ->124         | 3.135       | 0.481                | 0.257                |
| PBE0               | 123 ->124         | 0.3080              | 3.054       | 122 ->124         | 0.0000              | 3.576       | 123 ->124         | 2.745       | 120 ->124         | 3.128       | 0.383                | 0.309                |
| M06                | 123 ->124         | 0.3075              | 3.116       | 122 ->124         | 0.0001              | 3.612       | 123 ->124         | 2.823       | 120 ->124         | 3.291       | 0.468                | 0.294                |
| M06-2X             | 123 ->124         | 0.4807              | 3.830       | 115->124          | 0.0236              | 3.739       | 120 ->124         | 3.237       | 123 ->124         | 3.405       | 0.168                | 0.593                |
| $\omega$ B97       | 123 ->124         | 0.7730              | 4.494       | 120 ->124         | 0.0037              | 4.033       | 120 ->124         | 3.405       | 118 ->124         | 3.607       | 0.202                | 1.090                |
| $\omega$ B97X      | 123 ->124         | 0.7232              | 4.358       | 120 ->124         | 0.0045              | 3.985       | 120 ->124         | 3.358       | 123 ->124         | 3.561       | 0.202                | 0.999                |
| CAM-B3LYP          | 123 ->124         | 0.3683              | 3.874       | 123 ->124         | 0.1620              | 3.911       | 120 ->124         | 3.201       | 116 ->124         | 3.404       | 0.202                | 0.673                |
| LC- $\omega$ PBE17 | 123 ->124         | 0.4289              | 3.457       | 121->124          | 0.0333              | 3.479       | 121 ->124         | 2.904       | 123 ->124         | 3.063       | 0.159                | 0.553                |
| LC-BLYP17          | 123 ->124         | 0.4517              | 3.437       | 121->124          | 0.0057              | 3.495       | 121 ->124         | 2.934       | 123 ->124         | 3.084       | 0.150                | 0.503                |
| LC-BLYP20          | 123 ->124         | 0.5065              | 3.658       | 121 ->124         | 0.0126              | 3.581       | 121 ->124         | 3.021       | 123 ->124         | 3.207       | 0.187                | 0.638                |
| LC-BLYP33          | 123 ->124         | 0.7096              | 4.258       | 120 ->124         | 0.0038              | 3.869       | 120 ->124         | 3.255       | 123 ->124         | 3.484       | 0.229                | 1.003                |
| LC-BLYP            | 123 ->124         | 0.7978              | 4.585       | 117->124          | 0.0040              | 4.098       | 120 ->124         | 3.389       | 122 ->125         | 3.535       | 0.146                | 1.196                |
| LC-BLYP20 - M06-2X |                   |                     |             |                   |                     |             |                   |             |                   |             |                      | 0.421                |

**Table S18.** Excited state data for compound **6** calculated using TD-DFT/TDA with the functionals mentioned in the table, 6-311G(d) as the basis set and cyclohexane for the PCM model.

|                    | 1st singlet state |                     |             | 2nd singlet state |                     |             | 1st triplet state |             | 2nd triplet state |             | $\Delta E_{T_1-T_2}$ | $\Delta E_{S_1-T_1}$ |
|--------------------|-------------------|---------------------|-------------|-------------------|---------------------|-------------|-------------------|-------------|-------------------|-------------|----------------------|----------------------|
|                    | Transition        | oscillator strength | Energy (eV) | Transition        | oscillator strength | Energy (eV) | Transition        | Energy (eV) | Transition        | Energy (eV) | Energy (eV)          | Energy (eV)          |
| RI-CC2             | 177 ->178         | 0.2074              | 3.565       | 176->178          | 0.0012              | 3.646       | 176->178          | 3.494       | 177->178          | 3.502       | 0.009                | 0.071                |
| BLYP               | 177 -> 178        | 0.1131              | 2.437       | 176->178          | 0.0004              | 2.470       | 177 -> 178        | 2.346       | 176 ->178         | 2.352       | 0.007                | 0.092                |
| BPW91              | 177 -> 178        | 0.1146              | 2.444       | 176->178          | 0.0004              | 2.477       | 177 -> 178        | 2.349       | 176 ->178         | 2.354       | 0.004                | 0.095                |
| PBE                | 177 -> 178        | 0.1148              | 2.444       | 176->178          | 0.0004              | 2.477       | 177 -> 178        | 2.350       | 176 ->178         | 2.355       | 0.005                | 0.095                |
| M06L               | 177 -> 178        | 0.1189              | 2.698       | 176->178          | 0.0003              | 2.729       | 177 -> 178        | 2.602       | 176 ->178         | 2.607       | 0.005                | 0.096                |
| TPSS               | 177 -> 178        | 0.1191              | 2.546       | 176->178          | 0.0004              | 2.578       | 177 -> 178        | 2.448       | 176 ->178         | 2.452       | 0.004                | 0.098                |
| TPSSh              | 177 -> 178        | 0.1440              | 2.856       | 176->178          | 0.0005              | 2.895       | 177 -> 178        | 2.737       | 176 ->178         | 2.753       | 0.016                | 0.118                |
| B3LYP              | 177 -> 178        | 0.1668              | 3.069       | 176->178          | 0.0007              | 3.119       | 177 -> 178        | 2.934       | 176 ->178         | 2.963       | 0.029                | 0.136                |
| B971               | 177 -> 178        | 0.1719              | 3.112       | 176->178          | 0.0007              | 3.162       | 177 -> 178        | 2.977       | 176 ->178         | 3.008       | 0.031                | 0.134                |
| PBE0               | 177 -> 178        | 0.1862              | 3.230       | 176->178          | 0.0009              | 3.286       | 177 -> 178        | 3.072       | 176 ->178         | 3.096       | 0.024                | 0.159                |
| M06                | 177 -> 178        | 0.1836              | 3.268       | 176->178          | 0.0008              | 3.326       | 177 -> 178        | 3.121       | 176 ->178         | 3.145       | 0.024                | 0.148                |
| M06-2X             | 177 -> 178        | 0.3012              | 3.848       | 176->178          | 0.0031              | 3.943       | 177 -> 178        | 3.618       | 176 ->178         | 3.650       | 0.032                | 0.229                |
| $\omega$ B97       | 177 -> 178        | 0.4563              | 4.449       | 176->178          | 0.0086              | 4.602       | 175 -> 178        | 3.631       | 174 ->180         | 3.632       | 0.001                | 0.818                |
| $\omega$ B97X      | 177 -> 178        | 0.4044              | 4.292       | 176->178          | 0.0057              | 4.434       | 175 -> 178        | 3.624       | 174 ->180         | 3.626       | 0.002                | 0.668                |
| CAM-B3LYP          | 177 -> 178        | 0.2963              | 3.877       | 176->178          | 0.0026              | 3.980       | 176 -> 178        | 3.507       | 174 ->180         | 3.531       | 0.024                | 0.371                |
| LC- $\omega$ PBE17 | 177 -> 178        | 0.2280              | 3.348       | 176->178          | 0.0015              | 3.427       | 177 -> 178        | 3.157       | 176 ->178         | 3.195       | 0.038                | 0.191                |
| LC-BLYP17          | 177 -> 178        | 0.2241              | 3.324       | 176->178          | 0.0014              | 3.403       | 177 -> 178        | 3.145       | 176 ->178         | 3.195       | 0.050                | 0.179                |
| LC-BLYP20          | 177 -> 178        | 0.2594              | 3.532       | 176->178          | 0.0020              | 3.626       | 177 -> 178        | 3.319       | 176 ->180         | 3.360       | 0.041                | 0.214                |
| LC-BLYP33          | 177 -> 178        | 0.3965              | 4.179       | 176->178          | 0.0063              | 4.322       | 174 -> 178        | 3.615       | 174 ->181         | 3.622       | 0.006                | 0.563                |
| LC-BLYP            | 177 -> 178        | 0.4894              | 4.568       | 176->178          | 0.0110              | 4.726       | 175 -> 178        | 3.538       | 174 ->180         | 3.539       | 0.001                | 1.030                |
| LC-BLYP20 - M06-2X |                   |                     |             |                   |                     |             |                   |             |                   |             |                      | -0.086               |

**Table S19.** Excited state data for compound **7** calculated using TD-DFT/TDA with the functionals mentioned in the table, 6-311G(d) as the basis set and cyclohexane for the PCM model.

|                    | 1st singlet state |                     |             | 2nd singlet state |                     |             | 1st triplet state |             | 2nd triplet state |             | $\Delta E_{T_1-T_2}$ | $\Delta E_{S_1-T_1}$ |
|--------------------|-------------------|---------------------|-------------|-------------------|---------------------|-------------|-------------------|-------------|-------------------|-------------|----------------------|----------------------|
|                    | Transition        | oscillator strength | Energy (eV) | Transition        | oscillator strength | Energy (eV) | Transition        | Energy (eV) | Transition        | Energy (eV) | Energy (eV)          | Energy (eV)          |
| RI-CC2             | 153 ->154         | 0.0938              | 1.923       | 152->154          | 0.0017              | 1.882       | 153->154          | 1.853       | 152->154          | 1.852       | 0.000                | 0.071                |
| BLYP               | 153 ->154         | 0.1054              | 1.042       | 152->154          | 0.0015              | 1.086       | 152 ->154         | 0.878       | 153 ->154         | 0.884       | 0.006                | 0.164                |
| BPW91              | 153 ->154         | 0.1087              | 1.040       | 152->154          | 0.0015              | 1.085       | 152 ->154         | 0.867       | 153 ->154         | 0.876       | 0.008                | 0.173                |
| PBE                | 153 ->154         | 0.1092              | 1.038       | 152->154          | 0.0014              | 1.082       | 152 ->154         | 0.863       | 153 ->154         | 0.873       | 0.010                | 0.175                |
| M06L               | 152 ->154         | 0.0982              | 1.233       | 152->154          | 0.0017              | 1.254       | 153 ->154         | 1.080       | 152 ->154         | 1.093       | 0.013                | 0.153                |
| TPSS               | 153 ->154         | 0.1082              | 1.087       | 152->154          | 0.0015              | 1.128       | 152 ->154         | 0.916       | 153 ->154         | 0.925       | 0.009                | 0.172                |
| TPSSh              | 153 ->154         | 0.1000              | 1.309       | 152->154          | 0.0019              | 1.328       | 152 ->154         | 1.153       | 153 ->154         | 1.159       | 0.006                | 0.156                |
| B3LYP              | 153 ->154         | 0.0938              | 1.517       | 152->154          | 0.0022              | 1.522       | 153 ->154         | 1.373       | 152 ->154         | 1.375       | 0.002                | 0.144                |
| B971               | 153 ->154         | 0.0950              | 1.542       | 152->154          | 0.0022              | 1.545       | 152 ->154         | 1.400       | 153 ->154         | 1.400       | 0.000                | 0.143                |
| PBE0               | 153 ->154         | 0.0959              | 1.643       | 152->154          | 0.0023              | 1.639       | 153 ->154         | 1.486       | 152 ->154         | 1.490       | 0.004                | 0.157                |
| M06                | 153 ->154         | 0.0885              | 1.735       | 152->154          | 0.0023              | 1.718       | 153 ->154         | 1.597       | 152 ->154         | 1.599       | 0.002                | 0.139                |
| M06-2X             | 153 ->154         | 0.1055              | 2.295       | 152->154          | 0.0026              | 2.242       | 153 ->154         | 2.088       | 152 ->154         | 2.116       | 0.028                | 0.207                |
| $\omega$ B97       | 153 ->154         | 0.1384              | 2.989       | 152->154          | 0.0026              | 2.912       | 153 ->154         | 2.410       | 152 ->154         | 2.699       | 0.289                | 0.579                |
| $\omega$ B97X      | 153 ->154         | 0.1253              | 2.767       | 152->154          | 0.0026              | 2.702       | 153 ->154         | 2.308       | 152 ->154         | 2.514       | 0.206                | 0.459                |
| CAM-B3LYP          | 153 ->154         | 0.1046              | 2.302       | 152->154          | 0.0026              | 2.269       | 153 ->154         | 2.039       | 152 ->154         | 2.121       | 0.082                | 0.263                |
| LC- $\omega$ PBE17 | 153 ->154         | 0.0967              | 1.730       | 152 ->154         | 0.0019              | 1.716       | 153 ->154         | 1.546       | 152 ->154         | 1.560       | 0.014                | 0.183                |
| LC-BLYP17          | 153 ->154         | 0.0953              | 1.722       | 152->154          | 0.0020              | 1.711       | 153 ->154         | 1.551       | 152 ->154         | 1.564       | 0.013                | 0.172                |
| LC-BLYP20          | 153 ->154         | 0.0982              | 1.920       | 152->154          | 0.0021              | 1.896       | 153 ->154         | 1.723       | 152 ->154         | 1.747       | 0.024                | 0.197                |
| LC-BLYP33          | 153 ->154         | 0.1201              | 2.641       | 152->154          | 0.0021              | 2.581       | 153 ->154         | 2.233       | 152 ->154         | 2.391       | 0.158                | 0.408                |
| LC-BLYP            | 153 ->154         | 0.1470              | 3.147       | 152->154          | 0.0029              | 3.069       | 153 ->154         | 2.433       | 152 ->154         | 2.816       | 0.383                | 0.714                |
| LC-BLYP20 - M06-2X |                   |                     |             |                   |                     |             |                   |             |                   |             |                      | -0.168               |

**Table S20.** Excited state data for compound **8** calculated using TD-DFT/TDA with the functionals mentioned in the table, 6-311G(d) as the basis set and cyclohexane for the PCM model.

|                    | 1st singlet state |                     |             | 2nd singlet state |                     |             | 1st triplet state |             | 2nd triplet state |             | $\Delta E_{T_1-T_2}$ | $\Delta E_{S_1-T_1}$ |
|--------------------|-------------------|---------------------|-------------|-------------------|---------------------|-------------|-------------------|-------------|-------------------|-------------|----------------------|----------------------|
|                    | Transition        | oscillator strength | Energy (eV) | Transition        | oscillator strength | Energy (eV) | Transition        | Energy (eV) | Transition        | Energy (eV) | Energy (eV)          | Energy (eV)          |
| RI-CC2             | 179 ->180         | 0.0833              | 3.076       | 178->180          | 0.0049              | 3.150       | 177 ->180         | 2.575       | 165 ->180         | 2.961       | 0.386                | 0.501                |
| BLYP               | 179 ->180         | 0.0071              | 1.765       | 178->180          | 0.0009              | 1.803       | 179 ->180         | 1.739       | 178 ->180         | 1.786       | 0.047                | 0.025                |
| BPW91              | 179 ->180         | 0.0076              | 1.771       | 178->180          | 0.0010              | 1.808       | 179 ->180         | 1.743       | 178 ->180         | 1.790       | 0.047                | 0.027                |
| PBE                | 179 ->180         | 0.0074              | 1.776       | 178->180          | 0.0009              | 1.812       | 179 ->180         | 1.749       | 178 ->180         | 1.794       | 0.046                | 0.027                |
| M06L               | 179 ->180         | 0.0096              | 1.961       | 178->180          | 0.0011              | 2.002       | 179 ->180         | 1.922       | 178 ->180         | 1.984       | 0.062                | 0.039                |
| TPSS               | 179 ->180         | 0.0084              | 1.858       | 178->180          | 0.0011              | 1.896       | 179 ->180         | 1.826       | 178 ->180         | 1.878       | 0.052                | 0.032                |
| TPSSh              | 179 ->180         | 0.0130              | 2.161       | 178->180          | 0.0016              | 2.205       | 179 ->180         | 2.070       | 177 ->180         | 2.180       | 0.109                | 0.091                |
| B3LYP              | 179 ->180         | 0.0179              | 2.381       | 178->180          | 0.0024              | 2.431       | 177 ->180         | 2.177       | 179 ->180         | 2.357       | 0.180                | 0.204                |
| B971               | 179 ->180         | 0.0197              | 2.432       | 178->180          | 0.0026              | 2.482       | 177 ->180         | 2.215       | 179 ->180         | 2.406       | 0.191                | 0.217                |
| PBE0               | 179 ->180         | 0.0236              | 2.548       | 178->180          | 0.0031              | 2.601       | 177 ->180         | 2.222       | 179 ->180         | 2.496       | 0.274                | 0.326                |
| M06                | 179 ->180         | 0.0243              | 2.511       | 178->180          | 0.0031              | 2.565       | 177 ->180         | 2.221       | 179 ->180         | 2.468       | 0.246                | 0.289                |
| M06-2X             | 179 ->180         | 0.1092              | 3.279       | 178->180          | 0.0137              | 3.341       | 177 ->180         | 2.600       | 179 ->180         | 3.067       | 0.467                | 0.679                |
| $\omega$ B97       | 179 ->180         | 0.3357              | 3.806       | 178->180          | 0.0116              | 3.905       | 177 ->180         | 2.587       | 179 ->181         | 3.064       | 0.477                | 1.220                |
| $\omega$ B97X      | 179 ->180         | 0.3135              | 3.681       | 178->180          | 0.0141              | 3.803       | 177 ->180         | 2.542       | 179 ->181         | 3.025       | 0.483                | 1.139                |
| CAM-B3LYP          | 179 ->180         | 0.1916              | 3.326       | 177->180          | 0.0459              | 3.423       | 177 ->180         | 2.404       | 179 ->181         | 2.901       | 0.496                | 0.922                |
| LC- $\omega$ PBE17 | 179 ->180         | 0.0663              | 2.932       | 178->180          | 0.0057              | 2.954       | 177 ->180         | 2.320       | 173 ->180         | 2.617       | 0.297                | 0.612                |
| LC-BLYP17          | 179 ->180         | 0.0582              | 2.895       | 178->180          | 0.0067              | 2.935       | 177 ->180         | 2.334       | 173 ->181         | 2.668       | 0.335                | 0.561                |
| LC-BLYP20          | 179 ->180         | 0.1229              | 3.130       | 178->180          | 0.0079              | 3.150       | 177 ->180         | 2.403       | 172 ->180         | 2.772       | 0.369                | 0.727                |
| LC-BLYP33          | 179 ->180         | 0.3119              | 3.659       | 178->180          | 0.0068              | 3.696       | 177 ->180         | 2.548       | 179 ->181         | 2.998       | 0.449                | 1.110                |
| LC-BLYP            | 179 ->180         | 0.3487              | 3.862       | 178->180          | 0.1288              | 4.046       | 177 ->180         | 2.537       | 179 ->181         | 3.002       | 0.465                | 1.325                |
| LC-BLYP20 - M06-2X |                   |                     |             |                   |                     |             |                   |             |                   |             |                      | 0.530                |

**Table S21.** Excited state data for compound **9** calculated using TD-DFT/TDA with the functionals mentioned in the table, 6-311G(d) as the basis set and cyclohexane for the PCM model.

|                    | 1st singlet state |                     |             | 2nd singlet state |                     |             | 1st triplet state |             | 2nd triplet state |             | $\Delta E_{T_1-T_2}$ | $\Delta E_{S_1-T_1}$ |
|--------------------|-------------------|---------------------|-------------|-------------------|---------------------|-------------|-------------------|-------------|-------------------|-------------|----------------------|----------------------|
|                    | Transition        | oscillator strength | Energy (eV) | Transition        | oscillator strength | Energy (eV) | Transition        | Energy (eV) | Transition        | Energy (eV) | Energy (eV)          | Energy (eV)          |
| RI-CC2             | 118->119          | 1.0105              | 2.692       | 116->119          | 0.5851              | 3.488       | 118->119          | 2.159       | 116->119          | 2.809       | 0.651                | 0.534                |
| BLYP               | 118->119          | 0.5950              | 1.663       | 117->119          | 0.0000              | 1.798       | 118->119          | 1.361       | 117->119          | 1.784       | 0.422                | 0.302                |
| BPW91              | 118->119          | 0.6011              | 1.674       | 117->119          | 0.0000              | 1.818       | 118->119          | 1.367       | 117->119          | 1.802       | 0.435                | 0.307                |
| PBE                | 118->119          | 0.6031              | 1.675       | 117->119          | 0.0000              | 1.822       | 118->119          | 1.368       | 117->119          | 1.806       | 0.439                | 0.308                |
| M06L               | 118->119          | 0.6037              | 1.805       | 117->119          | 0.0000              | 1.958       | 118->119          | 1.505       | 117->119          | 1.943       | 0.438                | 0.300                |
| TPSS               | 118->119          | 0.6118              | 1.724       | 117->119          | 0.0000              | 1.881       | 118->119          | 1.413       | 117->119          | 1.865       | 0.452                | 0.310                |
| TPSSh              | 118->119          | 0.6740              | 1.978       | 117->119          | 0.0000              | 2.228       | 118->119          | 1.626       | 116->119          | 2.063       | 0.437                | 0.352                |
| B3LYP              | 118->119          | 0.7680              | 2.195       | 117->119          | 0.0001              | 2.515       | 118->119          | 1.764       | 116->119          | 2.234       | 0.470                | 0.431                |
| B971               | 118->119          | 0.7912              | 2.232       | 117->119          | 0.0001              | 2.569       | 118->119          | 1.798       | 116->119          | 2.274       | 0.476                | 0.434                |
| PBE0               | 118->119          | 0.8586              | 2.348       | 117->119          | 0.0001              | 2.732       | 118->119          | 1.818       | 116->119          | 2.339       | 0.521                | 0.530                |
| M06                | 118->119          | 0.8692              | 2.384       | 117->119          | 0.0001              | 2.745       | 118->119          | 1.865       | 116->119          | 2.401       | 0.536                | 0.518                |
| M06-2X             | 118->119          | 1.5024              | 2.950       | 116->119          | 0.6742              | 3.766       | 116->119          | 2.135       | 116->119          | 2.913       | 0.778                | 0.815                |
| $\omega$ B97       | 118->119          | 2.0066              | 3.444       | 116->119          | 0.1851              | 4.462       | 116->119          | 2.177       | 115->119          | 3.131       | 0.954                | 1.267                |
| $\omega$ B97X      | 118->119          | 1.9746              | 3.345       | 116->119          | 0.1980              | 4.301       | 116->119          | 2.137       | 115->119          | 3.076       | 0.939                | 1.208                |
| CAM-B3LYP          | 118->119          | 1.6224              | 3.018       | 116->119          | 0.5250              | 3.817       | 116->119          | 2.019       | 114->119          | 2.872       | 0.852                | 0.999                |
| LC- $\omega$ PBE17 | 118->119          | 1.4457              | 2.776       | 116->119          | 0.3349              | 3.423       | 116->119          | 1.908       | 116->119          | 2.628       | 0.720                | 0.867                |
| LC-BLYP17          | 118->119          | 1.4380              | 2.752       | 116->119          | 0.3517              | 3.406       | 116->119          | 1.932       | 116->119          | 2.639       | 0.707                | 0.821                |
| LC-BLYP20          | 118->119          | 1.6152              | 2.906       | 116->119          | 0.2859              | 3.596       | 116->119          | 1.983       | 115->119          | 2.750       | 0.768                | 0.923                |
| LC-BLYP33          | 118->119          | 1.9375              | 3.303       | 116->119          | 0.2024              | 4.223       | 116->119          | 2.110       | 115->119          | 3.009       | 0.899                | 1.193                |
| LC-BLYP            | 118->119          | 2.0285              | 3.504       | 116->119          | 0.1854              | 4.589       | 116->119          | 2.153       | 114->119          | 3.126       | 0.973                | 1.352                |
| LC-BLYP20 - M06-2X |                   |                     |             |                   |                     |             |                   |             |                   |             |                      | 0.771                |

**Table S22.** Excited state data for compound **10** calculated using TD-DFT/TDA with the functionals mentioned in the table, 6-311G(d) as the basis set and cyclohexane for the PCM model.

|                    | 1st singlet state |                     |             | 2nd singlet state |                     |             | 1st triplet state |             | 2nd triplet state |             | $\Delta E_{T_1-T_2}$ | $\Delta E_{S_1-T_1}$ |
|--------------------|-------------------|---------------------|-------------|-------------------|---------------------|-------------|-------------------|-------------|-------------------|-------------|----------------------|----------------------|
|                    | Transition        | oscillator strength | Energy (eV) | Transition        | oscillator strength | Energy (eV) | Transition        | Energy (eV) | Transition        | Energy (eV) | Energy (eV)          | Energy (eV)          |
| RI-CC2             | 151->152          | 0.0323              | 3.022       | 150->152          | 0.0104              | 3.031       | 151->152          | 3.010       | 150->152          | 3.019       | 0.009                | 0.012                |
| BLYP               | 151->152          | 0.0227              | 1.683       | 150->152          | 0.0079              | 1.696       | 151->152          | 1.665       | 150->152          | 1.668       | 0.003                | 0.019                |
| BPW91              | 151->152          | 0.0231              | 1.682       | 150->152          | 0.0081              | 1.694       | 151->152          | 1.662       | 150->152          | 1.666       | 0.004                | 0.020                |
| PBE                | 151->152          | 0.0233              | 1.664       | 150->152          | 0.0081              | 1.677       | 151->152          | 1.644       | 150->152          | 1.647       | 0.003                | 0.020                |
| M06L               | 151->152          | 0.0216              | 1.973       | 150->152          | 0.0077              | 1.983       | 151->152          | 1.956       | 150->152          | 1.959       | 0.003                | 0.017                |
| TPSS               | 151->152          | 0.0231              | 1.773       | 150->152          | 0.0081              | 1.785       | 151->152          | 1.753       | 150->152          | 1.756       | 0.004                | 0.020                |
| TPSSh              | 151->152          | 0.0245              | 2.180       | 150->152          | 0.0092              | 2.191       | 151->152          | 2.156       | 150->152          | 2.160       | 0.004                | 0.024                |
| B3LYP              | 151->152          | 0.0260              | 2.499       | 150->152          | 0.0100              | 2.510       | 151->152          | 2.472       | 150->152          | 2.477       | 0.005                | 0.027                |
| B971               | 151->152          | 0.0265              | 2.534       | 150->152          | 0.0101              | 2.545       | 151->152          | 2.507       | 150->152          | 2.513       | 0.005                | 0.027                |
| PBE0               | 151->152          | 0.0277              | 2.674       | 150->152          | 0.0106              | 2.685       | 151->152          | 2.639       | 150->152          | 2.646       | 0.006                | 0.034                |
| M06                | 151->152          | 0.0269              | 2.759       | 150->152          | 0.0102              | 2.769       | 151->152          | 2.732       | 150->152          | 2.739       | 0.007                | 0.027                |
| M06-2X             | 151->152          | 0.0365              | 3.429       | 150->152          | 0.0133              | 3.441       | 151->152          | 3.375       | 150->152          | 3.384       | 0.008                | 0.054                |
| $\omega$ B97       | 151->152          | 0.0571              | 4.226       | 150->152          | 0.0151              | 4.243       | 151->156          | 3.374       | 150->156          | 3.374       | 0.000                | 0.852                |
| $\omega$ B97X      | 151->152          | 0.0502              | 4.054       | 150->152          | 0.0153              | 4.069       | 151->156          | 3.355       | 150->156          | 3.355       | 0.000                | 0.699                |
| CAM-B3LYP          | 151->152          | 0.0374              | 3.523       | 150->152          | 0.0138              | 3.535       | 151->156          | 3.228       | 150->156          | 3.228       | 0.000                | 0.295                |
| LC- $\omega$ PBE17 | 151->152          | 0.0321              | 2.955       | 150->152          | 0.0132              | 2.967       | 151->152          | 2.902       | 150->152          | 2.908       | 0.007                | 0.054                |
| LC-BLYP17          | 151->152          | 0.0318              | 2.923       | 150->152          | 0.0127              | 2.935       | 151->152          | 2.876       | 150->152          | 2.882       | 0.006                | 0.047                |
| LC-BLYP20          | 151->152          | 0.0344              | 3.164       | 150->152          | 0.0133              | 3.176       | 150->156          | 3.082       | 151->156          | 3.083       | 0.001                | 0.083                |
| LC-BLYP33          | 151->152          | 0.0473              | 3.903       | 150->152          | 0.0152              | 3.917       | 151->156          | 3.270       | 150->156          | 3.270       | 0.000                | 0.633                |
| LC-BLYP            | 151->152          | 0.0631              | 4.369       | 150->152          | 0.0144              | 4.387       | 151->156          | 3.330       | 150->156          | 3.330       | 0.000                | 1.039                |
| LC-BLYP20 - M06-2X |                   |                     |             |                   |                     |             |                   |             |                   |             |                      | -0.211               |



## Optimized geometries and HOMO/LUMO topologies

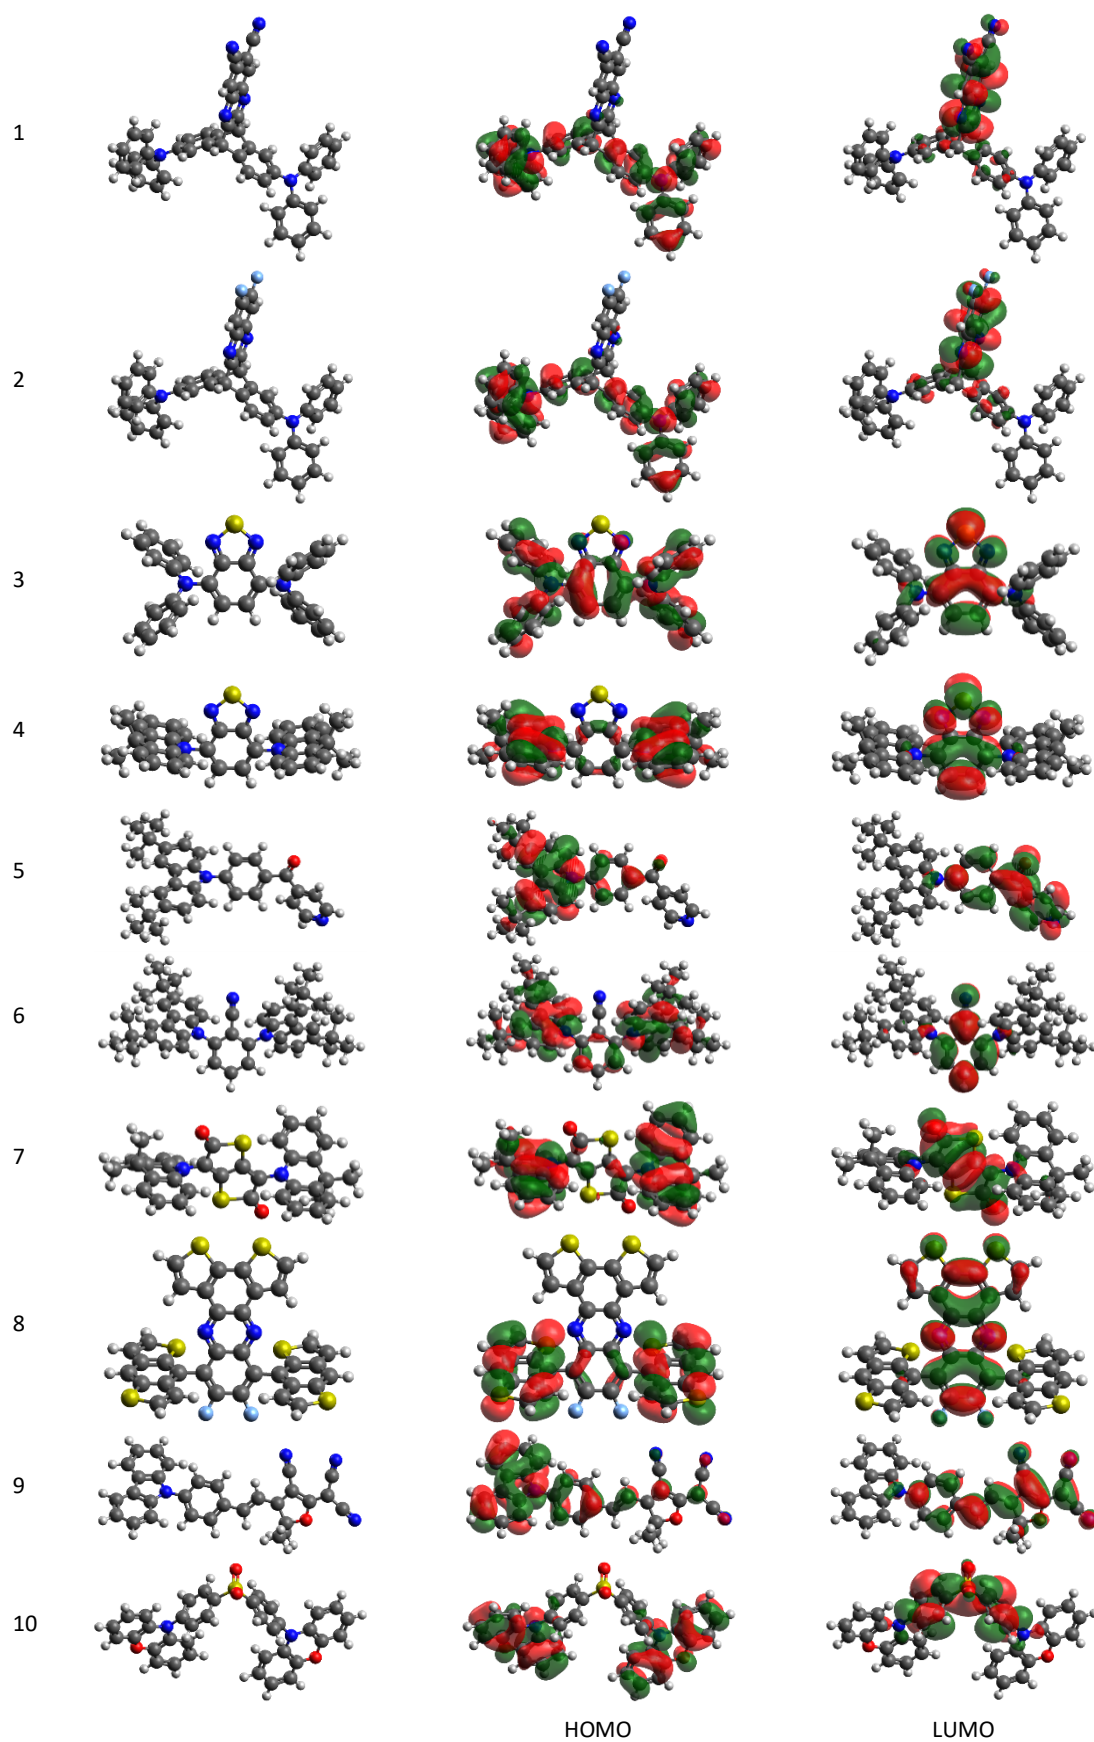

**Figure S2.** Optimized geometries and HOMO and LUMO topologies for all compounds (calculated using M06 and 6-311G(d)). Isocontour value = 0.02 a.u. for all orbitals.

# TDDFT versus riCC2 correlation plots

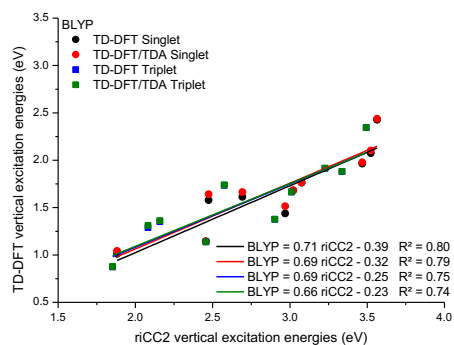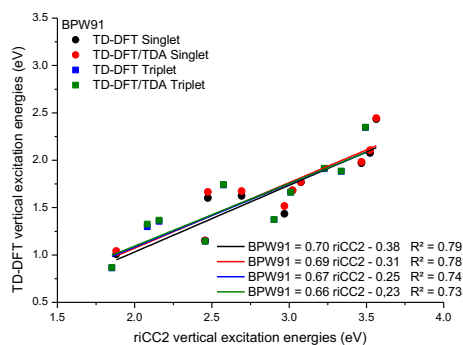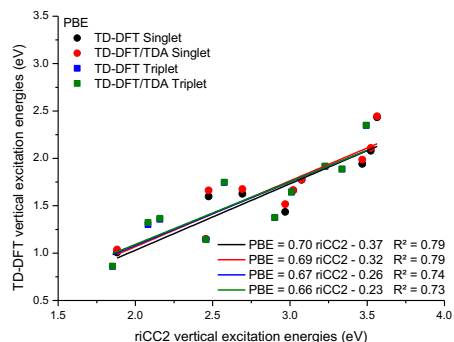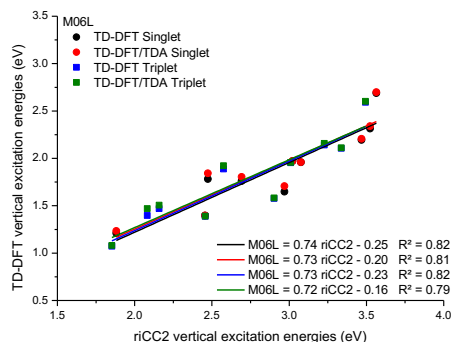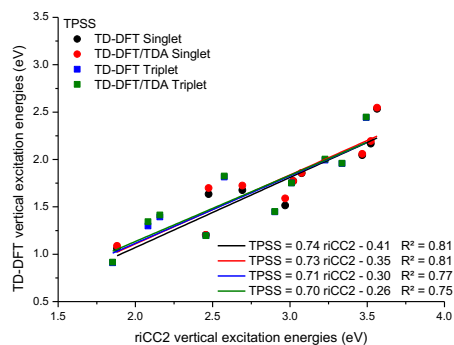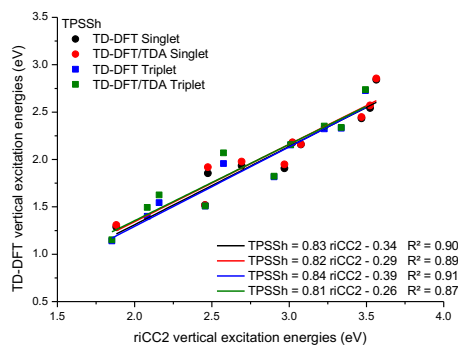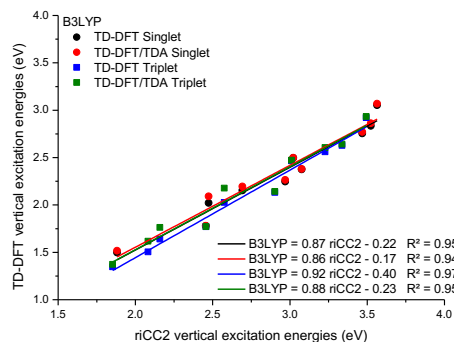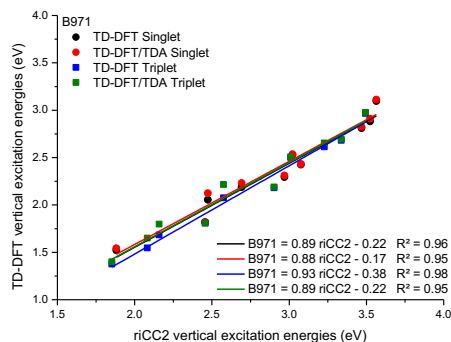

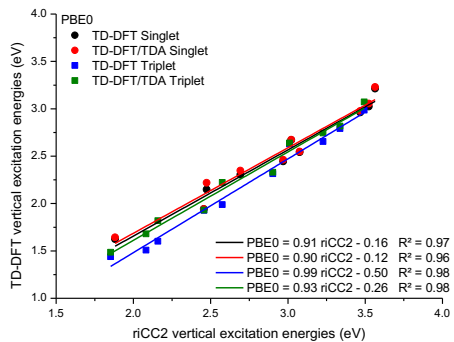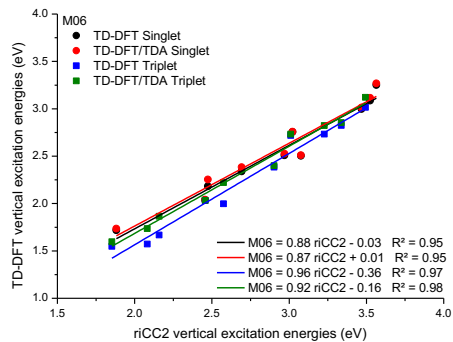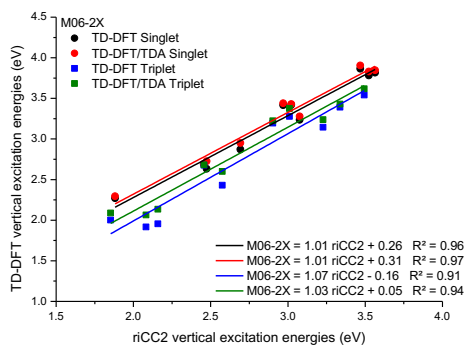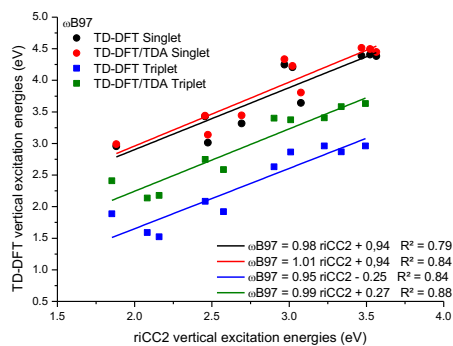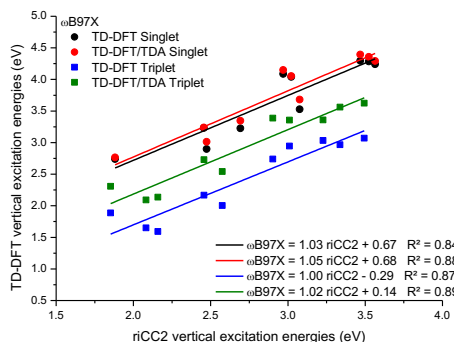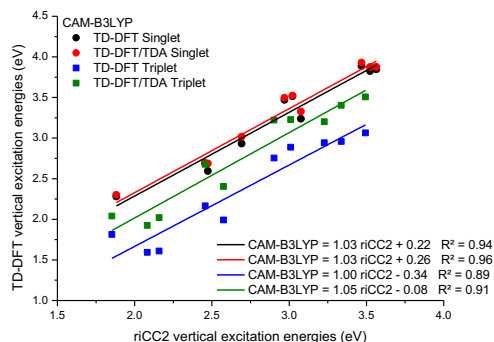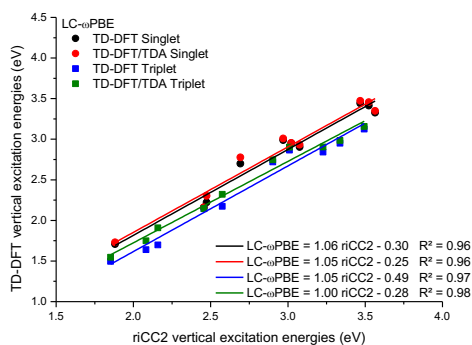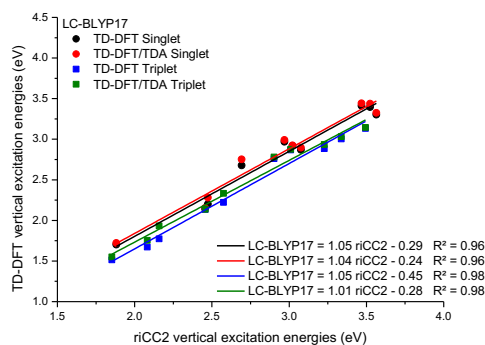

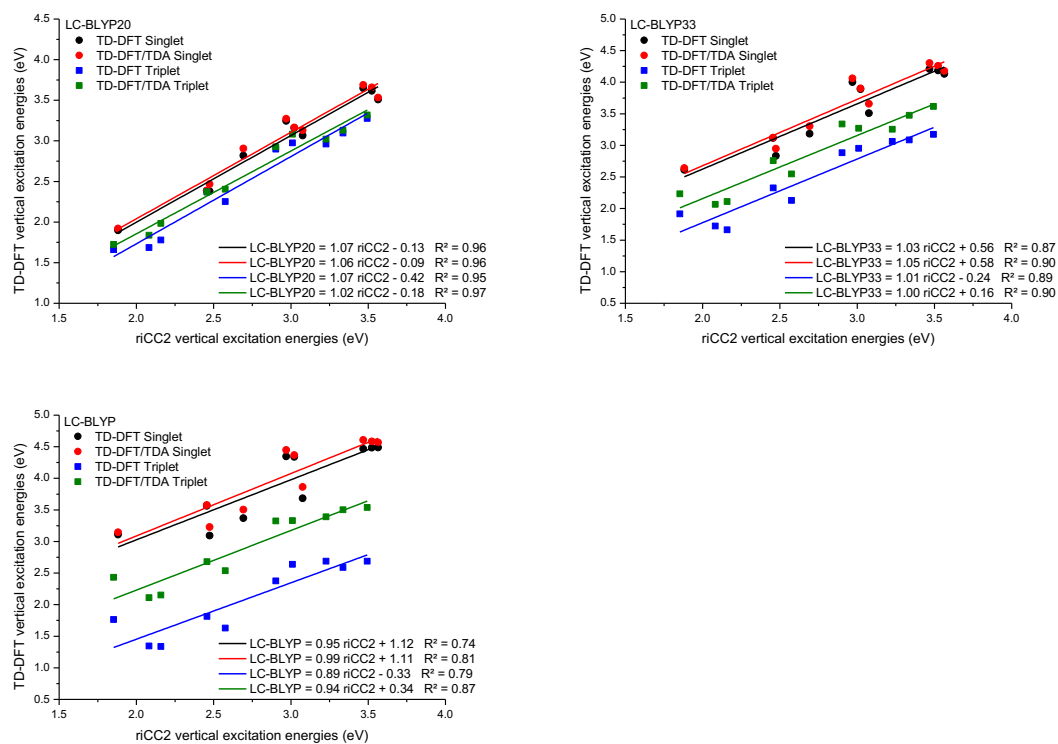

Figure S3. TDDFT versus riCC2 excitation energies as determined with different exchange-correlation functionals.

## Experimental section

### Materials and methods

Unless stated otherwise, all reagents and chemicals were obtained from commercial sources and used without further purification. Compounds **1**<sup>1</sup>, **3-6**,<sup>2-4</sup> and **9**<sup>5</sup> were synthesized according to their respective literature procedures. Compound **10** was obtained from Lumtech Inc (LT-N545).

Preparative (recycling) size exclusion chromatography (prep-SEC) was performed on a JAI LC-9110 NEXT system equipped with JAIGEL 1H and 2H columns (eluent CHCl<sub>3</sub>, flow rate 3.5 mL min<sup>-1</sup>). It was used to purify all synthesized compounds before performing any further analysis. NMR measurements were performed in CDCl<sub>3</sub> on 400 MHz instruments (Varian or Jeol). The chemical shifts ( $\delta$ , in ppm) were determined relative to the residual CHCl<sub>3</sub> (7.26 ppm) proton signals. MALDI-ToF mass spectra were recorded on a Bruker Daltonics Ultraflex II ToF/ToF. 1  $\mu$ L of the matrix solution (16 mg mL<sup>-1</sup> *trans*-2-[3-(4-*tert*-butylphenyl)-2-methyl-2-propenylidene]malononitrile in CHCl<sub>3</sub>) was spotted onto an MTP Anchorchip 600/384 MALDI plate. The spot was allowed to dry and 1  $\mu$ L of the analyte solution (0.5 mg mL<sup>-1</sup> in CHCl<sub>3</sub>) was spotted on top of the matrix.

### Synthesis procedures

#### Synthesis of TPA-QNX(F)2 (**2**)

(9*R*,10*R*)-2,6-bis(diphenylamino)-9,10-dihydro-9,10-ethanoanthracene-11,12-dione (TPA-DK) was synthesized according to literature.<sup>1</sup> TPA-DK (68.3 mg, 0.12 mmol) and 4,5-difluoro-1,2-benzenediamine (20.6 mg, 0.14 mmol) were heated to reflux for 1 h in ethanol/acetic acid (10 mL, 19/1). Orange crystals were formed at an early stage of the reaction. After the reaction, the mixture was cooled down to room temperature. The crystals were collected by filtration, washed with ethanol and dried under reduced pressure to obtain TPA-QNX(F)2 (19.7 mg, 24%). <sup>1</sup>H NMR (400 MHz, CDCl<sub>3</sub>): 7.67 (t, *J* = 9.3 Hz, 2H), 7.29 (d, *J* = 8.1 Hz, 2H), 7.25-7.18 (m, 10H), 7.06-6.98 (m, 12H), 6.82 (dd, *J* = 8.1, 2.2 Hz, 2H), 5.34 (s, 2H). <sup>13</sup>C NMR (100 MHz, CDCl<sub>3</sub>): 158.12, 152.90/152.73/150.36/150.19 (dd, *J* = 255.5, 17.3 Hz), 147.56, 146.85, 142.97, 136.29/136.23/136.17 (t, *J* = 5.9 Hz), 134.90, 129.39, 125.64, 124.74, 123.24, 121.19, 119.76, 114.81/114.74/114.68/114.62 (dd, *J* = 12.6, 6.8 Hz), 54.48. MS (ESI+) Calcd. for C<sub>46</sub>H<sub>30</sub>F<sub>2</sub>N<sub>4</sub> [M]<sup>+</sup>: *m/z* 676.244, found: 676.240.

#### Synthesis of TTD-DMAC (**7**)

##### 3,6-bis(9,9-dimethylacridin-10(9*H*)-yl)thieno[3,2-*b*]thiophene (DMAC-TT)

3,6-Dibromothieno[3,2-*b*]thiophene (504.8 mg, 1.69 mmol), 9,9-dimethyl-9,10-dihydroacridine (737.1 mg, 3.52 mmol), palladium(II) acetate (22.9 mg, 0.10 mmol), XPhos (84.2 mg, 0.18 mmol) and sodium *tert*-butoxide (339.2 mg, 3.53 mmol) were dissolved in dry toluene under argon atmosphere (12 mL) in a flame-dried Schlenk tube. The mixture was stirred at 110 °C for 24 h and then cooled down to room temperature. The reaction mixture was poured into water and extracted with CH<sub>2</sub>Cl<sub>2</sub>. The organic phase was dried over anhydrous MgSO<sub>4</sub>, filtered and concentrated under reduced pressure. The crude product was purified by silica gel column chromatography with CH<sub>2</sub>Cl<sub>2</sub>/petroleum ether (*v/v* = 20/80) as the eluent. The obtained solid was further purified by trituration in isopropanol, filtered and washed with CH<sub>2</sub>Cl<sub>2</sub>. The product was obtained as a white solid (456.7 mg, 49%). <sup>1</sup>H NMR (400 MHz, CDCl<sub>3</sub>): 7.52 (dd, *J* = 7.7, 1.6 Hz, 4H), 7.51 (s, 2H), 7.11 (ddd, *J* = 8.3, 7.3, 1.6 Hz, 4H), 7.03 (td, *J* = 7.5, 1.3 Hz, 4H), 6.64 (dd, *J* = 8.2, 1.3 Hz, 4H), 1.74 (s, 12H). <sup>13</sup>C NMR (100 MHz, CDCl<sub>3</sub>): 139.78, 137.41, 132.43, 131.10, 127.70, 126.80, 125.17, 121.58, 114.02, 36.15, 30.51.

##### 10,10'-(2,5-bis(4,4,5,5-tetramethyl-1,3,2-dioxaborolan-2-yl)thieno[3,2-*b*]thiophene-3,6-diyl)bis(9,9-dimethyl-9,10-dihydroacridine) (DMAC-TT-pinacol)<sup>6</sup>

DMAC-TT (199.0 mg, 0.36 mmol), bis(pinacolato)diboron (276.7 mg, 1.09 mmol), 4,4'-di-*tert*-butyl-2,2'-bipyridine (22.5 mg, 0.08 mmol), and [Ir(OMe)(COD)]<sub>2</sub> (28.1 mg, 0.04 mmol) were added to a flame-dried Schlenk under argon atmosphere and subsequently dry cyclohexane (10 mL) was added. The resulting mixture was stirred at 80 °C for 15 h in the dark. After cooling down to room temperature, the reaction mixture was poured in water and the organic material was extracted using CH<sub>2</sub>Cl<sub>2</sub>. The organic layer was washed with brine and dried over MgSO<sub>4</sub>. After removing the solvent under reduced pressure, the residue was purified by silica gel column chromatography with CH<sub>2</sub>Cl<sub>2</sub> to afford the product as a beige solid (156.4 mg, 54%). <sup>1</sup>H NMR (400 MHz, CDCl<sub>3</sub>): 7.48 (dd, *J* = 7.7, 1.6 Hz, 4H), 7.02 (ddd, *J* = 8.2, 7.2, 1.6 Hz, 4H), 6.94 (td, *J* = 7.4, 1.3 Hz, 4H), 6.39 (dd, *J* = 8.1, 1.3 Hz, 4H), 1.86 (s, br, 6H), 1.66 (s, br, 6H), 0.99 (s, 24H). <sup>13</sup>C NMR (100 MHz, CDCl<sub>3</sub>): 144.08, 139.98, 134.43 (br), 130.37, 126.52, 125.13, 120.67, 113.75, 84.10, 53.48, 36.05, 33.92 (br), 29.29 (br), 24.39.

##### 3,6-bis(9,9-dimethylacridin-10(9*H*)-yl)thieno[3,2-*b*]thiophene-2,5-dione (TTD-DMAC)<sup>6</sup>

To a solution of DMAC-TT-pinacol (152.0 mg, 0.19 mmol) in THF (10 mL) and H<sub>2</sub>O (1 mL) was added Oxone (372.8 mg, 0.61 mmol) in one portion at room temperature. The mixture was stirred at room temperature for 3 h in the dark, and then quenched with Na<sub>2</sub>S<sub>2</sub>O<sub>3</sub> (aq.). The organic layer was extracted with hexanes, washed with water and dried over MgSO<sub>4</sub>. After evaporation of the solvent, the residue was purified by silica gel column chromatography with CH<sub>2</sub>Cl<sub>2</sub>/petroleum ether (*v/v* = 20/80) to give TTD-DMAC (18.9 mg, 17%) as a dark green/black solid. <sup>1</sup>H NMR (400 MHz, CDCl<sub>3</sub>): 7.52 (dd, *J* = 7.8, 1.5 Hz, 4H), 7.23 (ddd, *J* = 8.1, 7.3, 1.5 Hz, 4H), 7.11 (td, *J* = 7.5, 1.2 Hz, 4H), 6.76 (dd, *J* = 8.1, 1.2 Hz, 4H), 1.69 (s, 12H). <sup>13</sup>C NMR (100 MHz, CDCl<sub>3</sub>): 183.17, 155.48, 137.69, 133.24, 132.17, 127.12, 125.89, 123.08, 114.18, 36.19, 30.63. MS (MALDI-TOF) Calcd. for C<sub>36</sub>H<sub>28</sub>N<sub>2</sub>O<sub>2</sub>S<sub>2</sub> [M]<sup>+</sup>: *m/z* 584.159, found: 584.165.

#### Synthesis of DTBQx-BDT-TIPS (**8**)

##### 3,6-bis(triisopropylsilyl)benzo[1,2-*b*:4,5-*b'*]dithiophene (BDT-TIPS)<sup>7</sup>

To a solution of benzo[1,2-*b*:4,5-*b'*]dithiophene (1.26 g, 6.63 mmol) in THF (10.0 mL), *n*-BuLi (2.5 M in hexane; 8.0 mL, 19.89 mmol) was added dropwise at 0 °C and the mixture was stirred for 1 h at room temperature. Afterwards, triisopropylsilyl chloride (4.2 mL, 19.6 mmol) was slowly added. After the mixture was heated to reflux for 16 h, it was poured out in a beaker containing water

(100 mL) and hydrochloric acid (1 M, 100 mL). The resulting precipitate was collected by vacuum filtration and washed with water, methanol and *n*-hexane. The filtrate was then evaporated under reduced pressure and the remaining solid was triturated in *n*-hexane, followed by filtration and subsequent washing with *n*-hexane. BDT-TIPS was obtained as a white solid (2.49 g, 75%). <sup>1</sup>H NMR (400 MHz, CDCl<sub>3</sub>): 8.30 (s, 2H), 7.50 (s, 2H), 1.48-1.37 (m, 6H), 1.16 (d, *J* = 7.4 Hz, 36H). <sup>13</sup>C NMR (100 MHz, CDCl<sub>3</sub>): 140.62, 138.95, 138.31, 131.55, 115.63, 18.66, 11.85.

*(4-(4,4,5,5-tetramethyl-1,3,2-dioxaborolan-2-yl)benzo[1,2-*b*:4,5-*b'*]dithiophene-2,6-diyl)bis(triisopropylsilane) (BDT-TIPS-pinacol)*<sup>7</sup>

A mixture of BDT-TIPS (1.635 g 3.25 mmol), bis(pinacolato)diboron (1.48 g, 5.81 mmol), [Ir(OMe)(COD)]<sub>2</sub> (107.2 mg, 0.16 mmol), and 4,4'-di-*tert*-butyl-2,2'-bipyridine (94.8 mg, 0.35 mmol) in dry cyclohexane was stirred in the dark at 80 °C for 16 h under nitrogen atmosphere. After cooling down to room temperature, evaporation of the solvent under reduced pressure gave a residue, which was purified by silica gel column chromatography with CH<sub>2</sub>Cl<sub>2</sub>/petroleum ether (*v/v*= 20/80) to yield BDT-TIPS-pinacol as a white solid (555.3 mg, 27%). The reaction also yields unreacted BDT-TIPS as well as disubstituted BDT-TIPS-pinacol as the main side products. <sup>1</sup>H NMR (400 MHz, CDCl<sub>3</sub>): 8.39 (s, 1H), 8.35 (s, 1H), 7.52 (s, 1H), 1.47 (s, 12H), 1.50-1.39 (m, 6H), 1.19 (d, *J* = 7.4 Hz, 36H). <sup>13</sup>C NMR (100 MHz, CDCl<sub>3</sub>): 148.3, 144.0, 140.0, 138.7, 138.0, 137.7, 134.1, 130.8, 118.1, 116.0, 83.7, 24.8, 18.4, 11.6.

*1,2-di(thiophen-3-yl)ethane-1,2-dione*

3-Bromothiophene (2.34 mL, 24.69 mmol) was added dropwise to a solution of *n*-BuLi (2.5 M in *n*-hexane; 11.0 mL, 27.50 mmol) in THF (50 mL) and the resulting mixture was stirred at -78 °C for 1 h. The reaction mixture was subsequently added to a homogeneously stirred suspension of CuBr (3.59 g, 25.03 mmol) and LiBr (4.34 g, 49.98 mmol) in THF (50 mL) at 0 °C and the mixture was stirred for 1 h at this temperature. After dropwise addition of oxalyl chloride (1.1 mL, 12.57 mmol), the reaction mixture was again stirred for 1 h at 0 °C. The reaction was quenched with a saturated aqueous NH<sub>4</sub>Cl solution (40 mL). After partial removal of the reaction solvent under reduced pressure, the product was extracted with hexanes and the organic phase was washed with a saturated aqueous NH<sub>4</sub>Cl solution, water and brine. The organic phase was dried over MgSO<sub>4</sub>, filtered and the solvent was removed under reduced pressure. The residue was purified by silica gel column chromatography with CH<sub>2</sub>Cl<sub>2</sub>/petroleum ether (*v/v*= 50/50) to give a yellow crystalline product (2.11 g, 76%). <sup>1</sup>H NMR (400 MHz, CDCl<sub>3</sub>): 8.36 (dd, *J* = 2.9, 1.2 Hz, 2H), 7.70 (dd, *J* = 5.1, 1.2 Hz, 2H), 7.40 (dd, *J* = 5.1, 2.9 Hz, 2H).

*benzo[2,1-*b*:3,4-*b'*]dithiophene-4,5-dione*

To a stirring solution of 1,2-di(thiophen-3-yl)ethane-1,2-dione (1.00 g, 4.50 mmol) in CH<sub>2</sub>Cl<sub>2</sub> (200 mL), a solution of FeCl<sub>3</sub> (2.92 g, 18.00 mmol) in nitromethane (25 mL) was added dropwise. The reaction mixture was stirred for at room temperature for 3 h after which the reaction was quenched with a 1 M aqueous HCl solution (50 mL). The product was extracted with chloroform and washed with a 1 M aqueous HCl solution, water and brine. The organic phase dried over MgSO<sub>4</sub>, filtered and the solvent was removed under reduced pressure. The residue was purified by silica gel column chromatography using chloroform as the eluent and after evaporation of the solvent under reduced pressure, a black crystalline product was obtained (0.60 g, 61%). <sup>1</sup>H NMR (400 MHz, CDCl<sub>3</sub>): 7.50 (d, *J* = 5.2 Hz, 2H), 7.21 (d, *J* = 5.2 Hz, 2H).

*3,6-dibromo-4,5-difluorobenzene-1,2-diamine*

1,4-Dibromo-2,3-difluoro-5,6-dinitrobenzene<sup>8</sup> (1.00 g, 2.76 mmol) and iron powder (2.25 g, 40.29 mmol) were stirred in acetic acid (40 mL) at 45 °C for 6 h. The solution was cooled down to room temperature and then poured into a cold NaOH solution (5%, 100 mL). The product was extracted with ethyl acetate and washed with a saturated aqueous NaHCO<sub>3</sub> solution. The organic phase was collected, dried over MgSO<sub>4</sub>, filtered and the solvent was removed under reduced pressure to obtain the product in a quantitative yield (0.82 g). <sup>1</sup>H NMR (400 MHz, CDCl<sub>3</sub>): 5.16 (s, 4H).

*8,11-dibromo-9,10-difluorodithieno[3,2-*a*:2',3'-*c*]phenazine (DTPz)*

Benzo[2,1-*b*:3,4-*b'*]dithiophene-4,5-dione (0.50 g, 2.27 mmol) and 3,6-dibromo-4,5-difluorobenzene-1,2-diamine (0.69 g, 2.27 mmol) were dissolved in acetic acid (20 mL) and the resulting solution was stirred at 75 °C for 16 h. The reaction was quenched with a saturated aqueous NaHCO<sub>3</sub> solution. The product was extracted with chloroform and washed with a saturated aqueous NaHCO<sub>3</sub> solution, water and brine. The organic phase dried over MgSO<sub>4</sub>, filtered and the solvent was removed under reduced pressure. The product was purified by recrystallization from CH<sub>2</sub>Cl<sub>2</sub>/MeOH to acquire a yellow crystalline product (0.94 g, 85%). <sup>1</sup>H NMR (400 MHz, CDCl<sub>3</sub>): 8.53 (d, *J* = 5.3 Hz, 2H), 7.65 (d, *J* = 5.3 Hz, 2H).

*8,11-bis(2,6-bis(triisopropylsilyl)benzo[1,2-*b*:4,5-*b'*]dithiophen-4-yl)-9,10-difluorodithieno[3,2-*a*:2',3'-*c*]phenazine (DTPz-BDT-TIPS)*

DTPz (90.2 mg, 186.5 μmol), BDT-TIPS-pinacol (245.0 mg, 389.6 μmol) and tetrakis(triphenylphosphine)palladium(0) (10.7 mg, 9.3 μmol) were added to a flame-dried Schlenk flask. The flask was evacuated and backfilled with nitrogen three times and pre-degassed anhydrous DMF (16 mL) and a K<sub>2</sub>CO<sub>3</sub> solution (2 M, 4 mL) were added. The reaction mixture was heated at 130 °C and stirred for 24 h under a nitrogen atmosphere. The reaction mixture was poured into water, then extracted with dichloromethane and dried over MgSO<sub>4</sub>, filtered and washed. After evaporation of the solvent under reduced pressure, the product was purified by silica gel column chromatography with CH<sub>2</sub>Cl<sub>2</sub>/petroleum ether (*v/v*= 20/80) as the eluent. DTPz-BDT-TIPS was further purified using preparative (recycling) GPC and was obtained as a yellow solid (60.0 mg, 24%). <sup>1</sup>H NMR (400 MHz, CDCl<sub>3</sub>): 8.57 (d, *J* = 2.0 Hz, 2H), 7.70 (d, *J* = 1.9 Hz, 2H), 7.47 (dd, *J* = 5.3, 1.7 Hz, 2H), 7.23 (s, 1H), 7.16 (dd, *J* = 5.3, 2.1 Hz, 2H), 7.12 (s, 1H), 1.45-1.18 (m, 12H), 1.17-0.90 (m, 72H). <sup>13</sup>C NMR (100 MHz, CDCl<sub>3</sub>): 151.72, 151.55, 149.16, 148.97, 142.74, 142.64, 140.86, 140.80, 139.19, 139.16, 138.94, 138.54, 138.48, 138.24, 138.18, 137.07, 137.03, 136.06, 134.61, 131.90, 131.76, 131.62, 131.54, 124.41, 124.34, 124.33, 124.27, 119.24, 119.18, 116.53, 77.38, 18.69, 18.66, 18.60, 18.55, 18.50, 18.46, 18.38, 11.85, 11.82, 11.76, 11.71. MS (ESI+) Calcd. for C<sub>72</sub>H<sub>94</sub>F<sub>2</sub>N<sub>2</sub>S<sub>6</sub>Si<sub>4</sub> [M]<sup>+</sup>: *m/z* 1328.479, found: 1328.475.

## UV-VIS absorption and emission (fluorescence) spectra

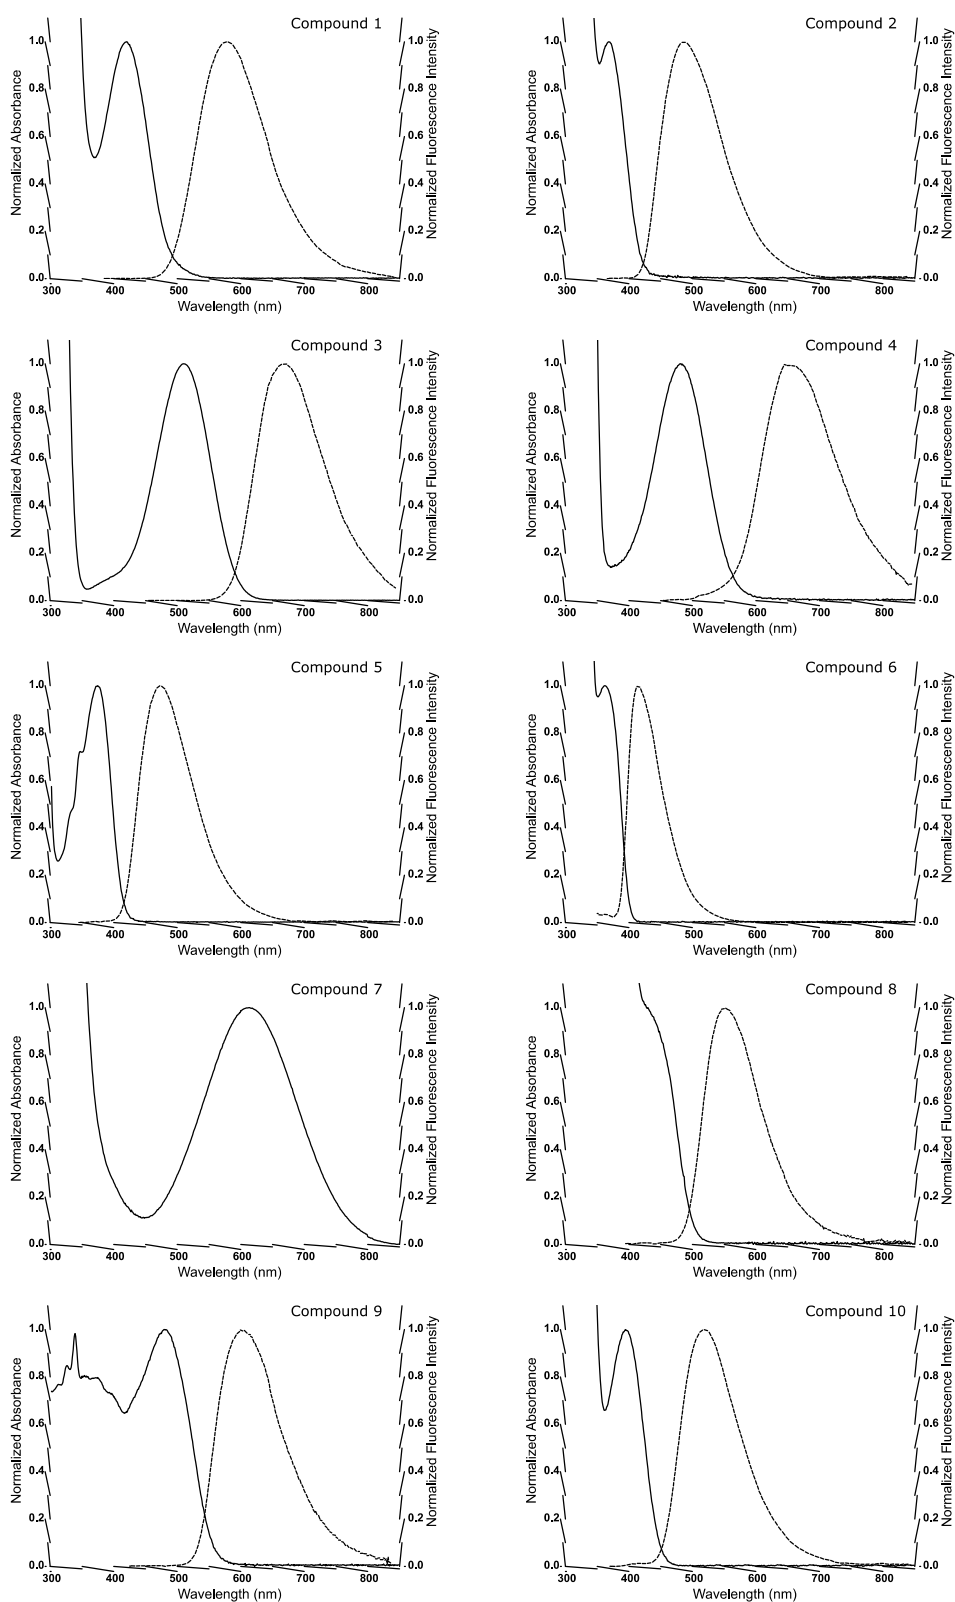

**Figure S4.** Normalized absorption spectra (solid lines) of all compounds and their corresponding normalized fluorescence spectra (dashed lines) in toluene. Spectra are normalized to their charge transfer bands.

**Table S23.** Spectroscopic data for all compounds in toluene.<sup>a</sup>

| Compound  | $\lambda_{abs}$<br>(nm) <sup>b</sup> | $\lambda_{em}$<br>(nm) <sup>c</sup> | $\Delta\bar{\nu}$<br>(cm <sup>-1</sup> ) <sup>d</sup> |
|-----------|--------------------------------------|-------------------------------------|-------------------------------------------------------|
| <b>1</b>  | 421                                  | 578                                 | 6452                                                  |
| <b>2</b>  | 368                                  | 486                                 | 6598                                                  |
| <b>3</b>  | 510                                  | 668                                 | 4638                                                  |
| <b>4</b>  | 481                                  | 645                                 | 5286                                                  |
| <b>5</b>  | 375                                  | 473                                 | 5525                                                  |
| <b>6</b>  | 362                                  | 414                                 | 3470                                                  |
| <b>7</b>  | 613                                  | - <sup>e</sup>                      | - <sup>e</sup>                                        |
| <b>8</b>  | 430                                  | 553                                 | 5173                                                  |
| <b>9</b>  | 480                                  | 602                                 | 4222                                                  |
| <b>10</b> | 395                                  | 519                                 | 6049                                                  |

<sup>a</sup> Only data on the charge transfer bands are given.

<sup>b</sup> Charge transfer absorption maximum.

<sup>c</sup> Charge transfer fluorescence emission maximum.

<sup>d</sup> Stokes shift.

<sup>e</sup> No fluorescence observed.



# NMR spectra

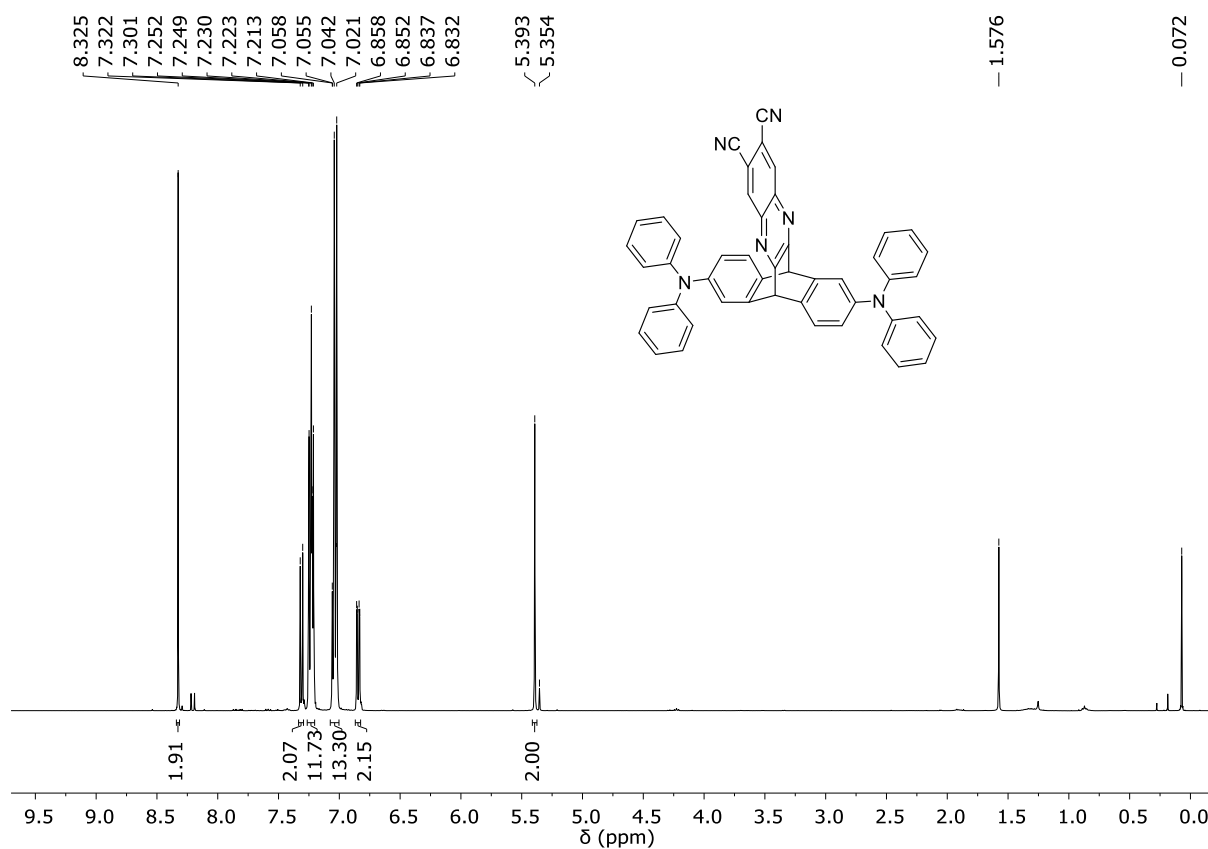

Figure S5. <sup>1</sup>H NMR spectrum of compound 1 in CDCl<sub>3</sub>.

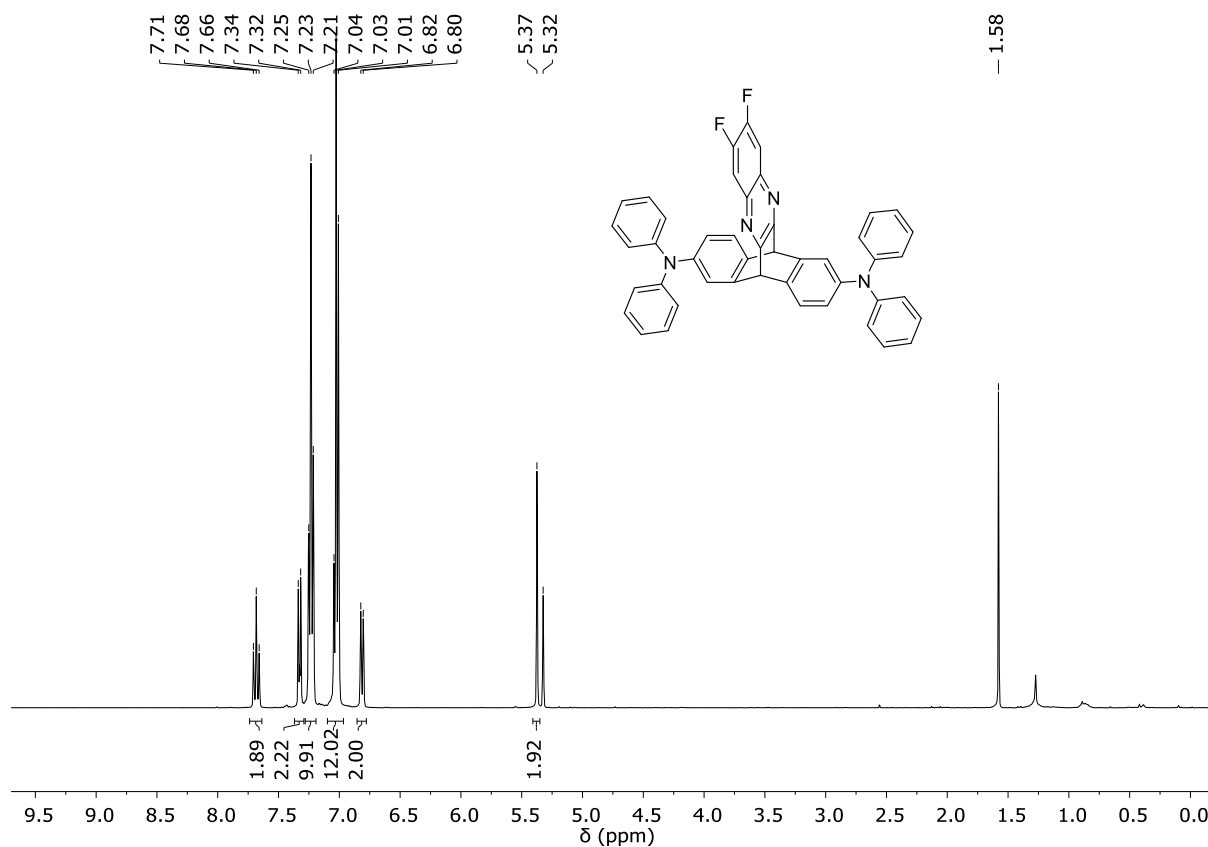

Figure S6. <sup>1</sup>H NMR spectrum of compound 2 in CDCl<sub>3</sub>.

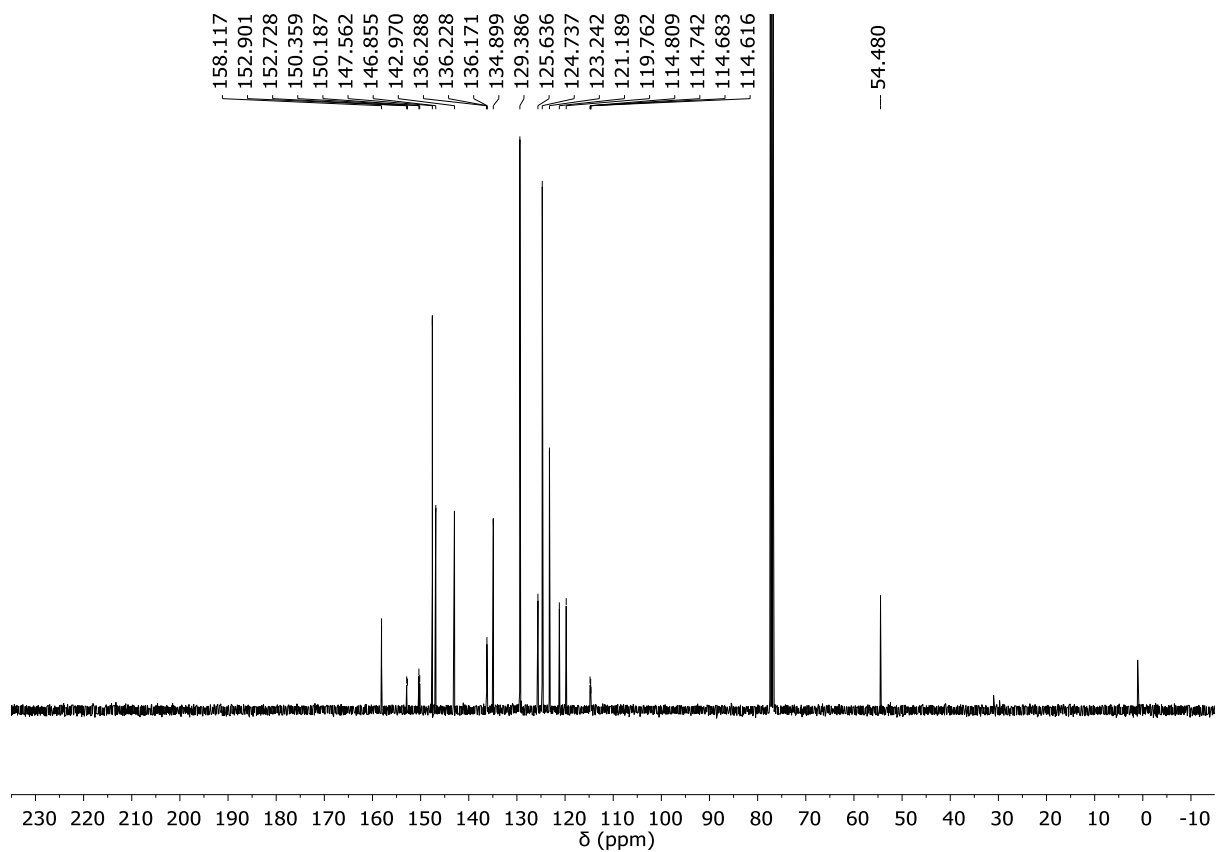

Figure S7.  $^{13}\text{C}$  NMR spectrum of compound **2** in  $\text{CDCl}_3$ .

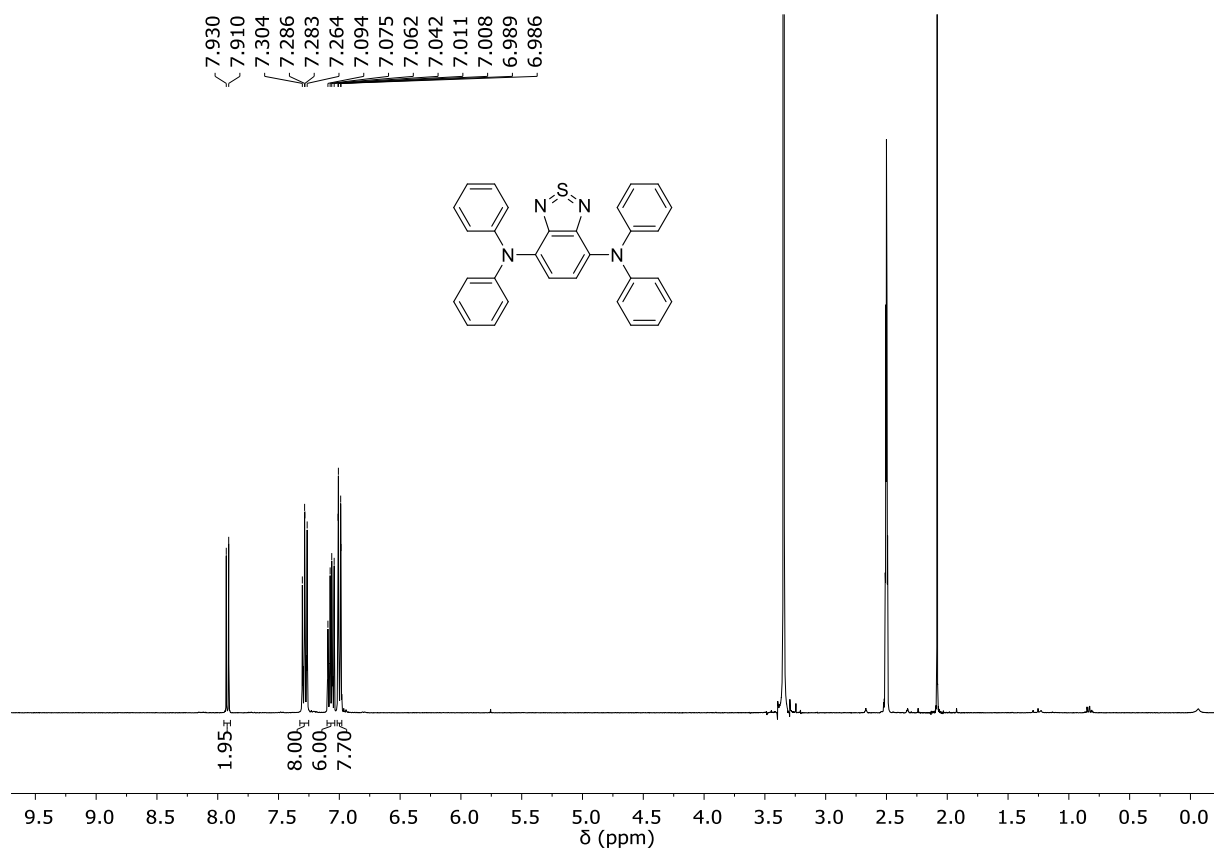

Figure S8.  $^1\text{H}$  NMR spectrum of compound **3** in  $\text{DMSO}-d_6$ .

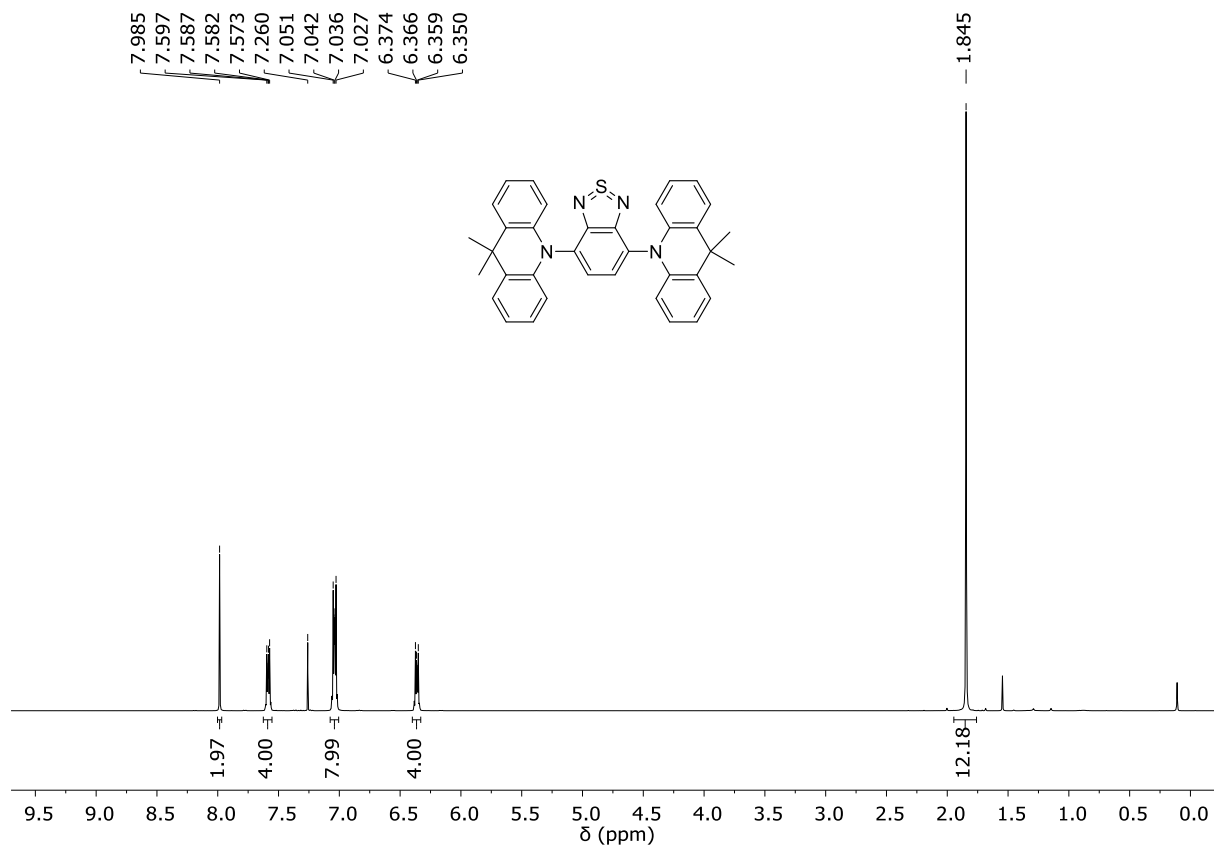

Figure S9. <sup>1</sup>H NMR spectrum of compound 4 in CDCl<sub>3</sub>.

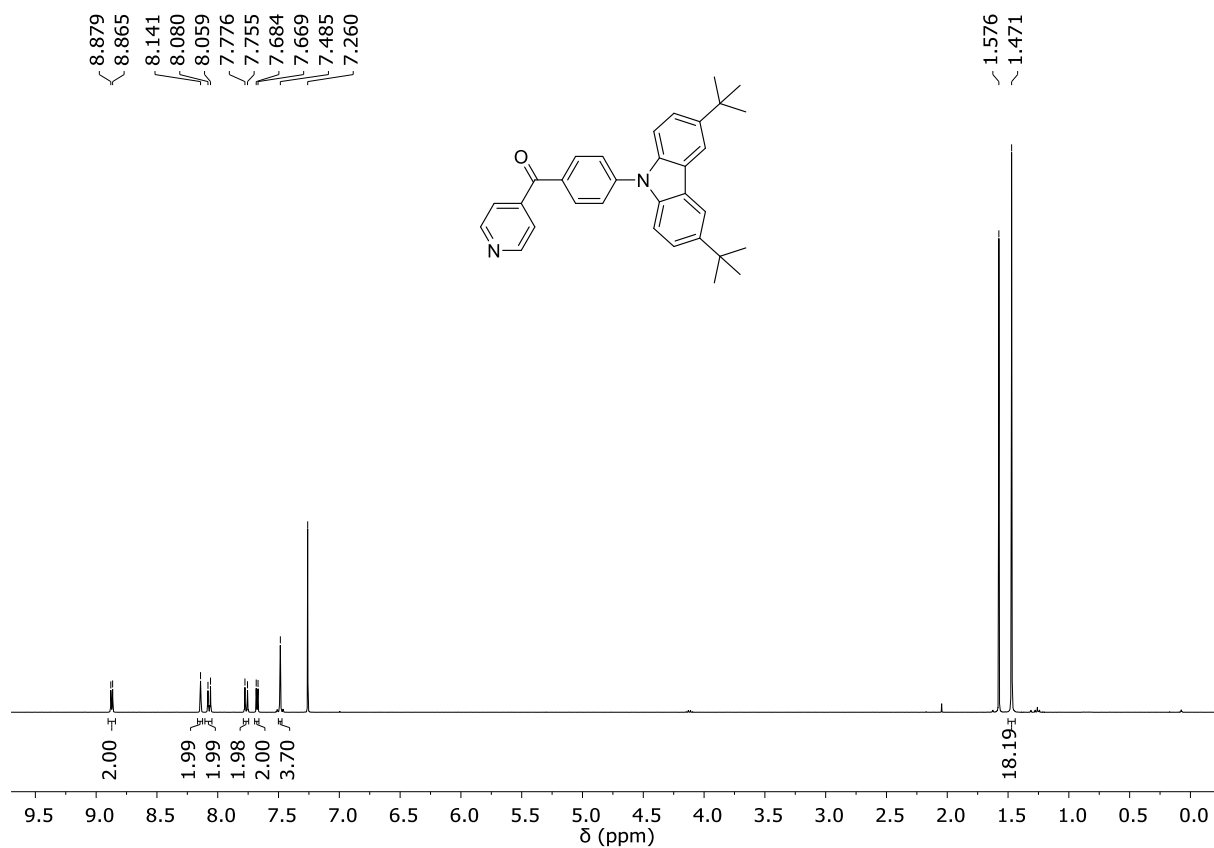

Figure S10. <sup>1</sup>H NMR spectrum of compound 5 in CDCl<sub>3</sub>.

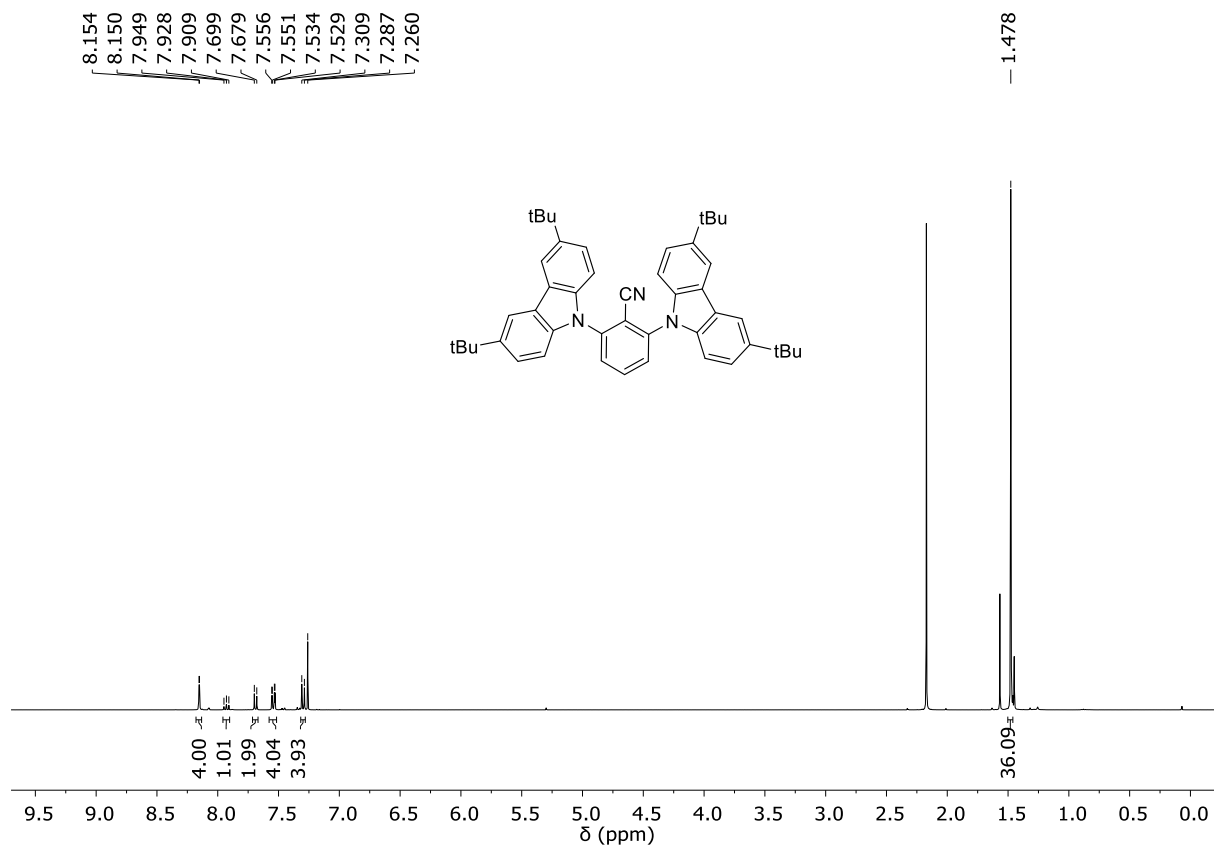

Figure S11. <sup>1</sup>H NMR spectrum of compound 6 in CDCl<sub>3</sub>.

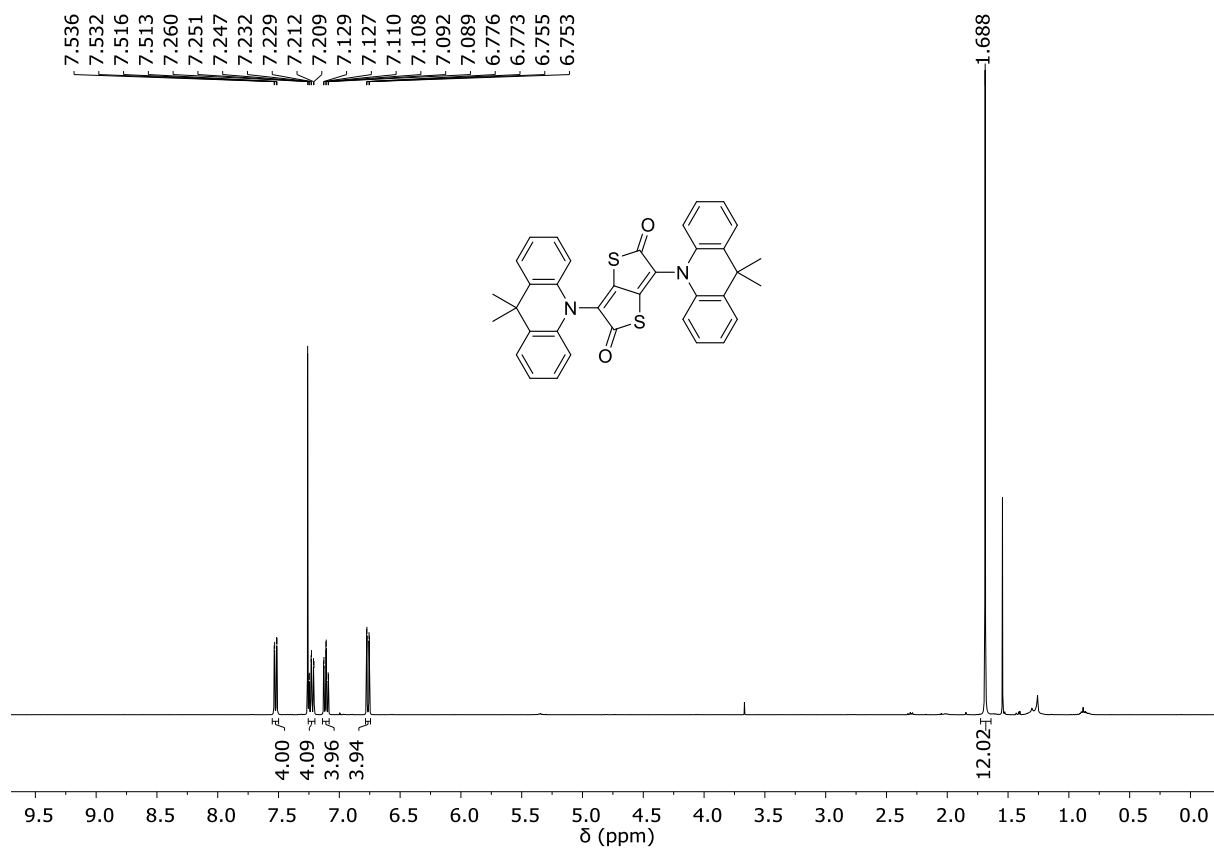

Figure S12. <sup>1</sup>H NMR spectrum of compound 7 in CDCl<sub>3</sub>.

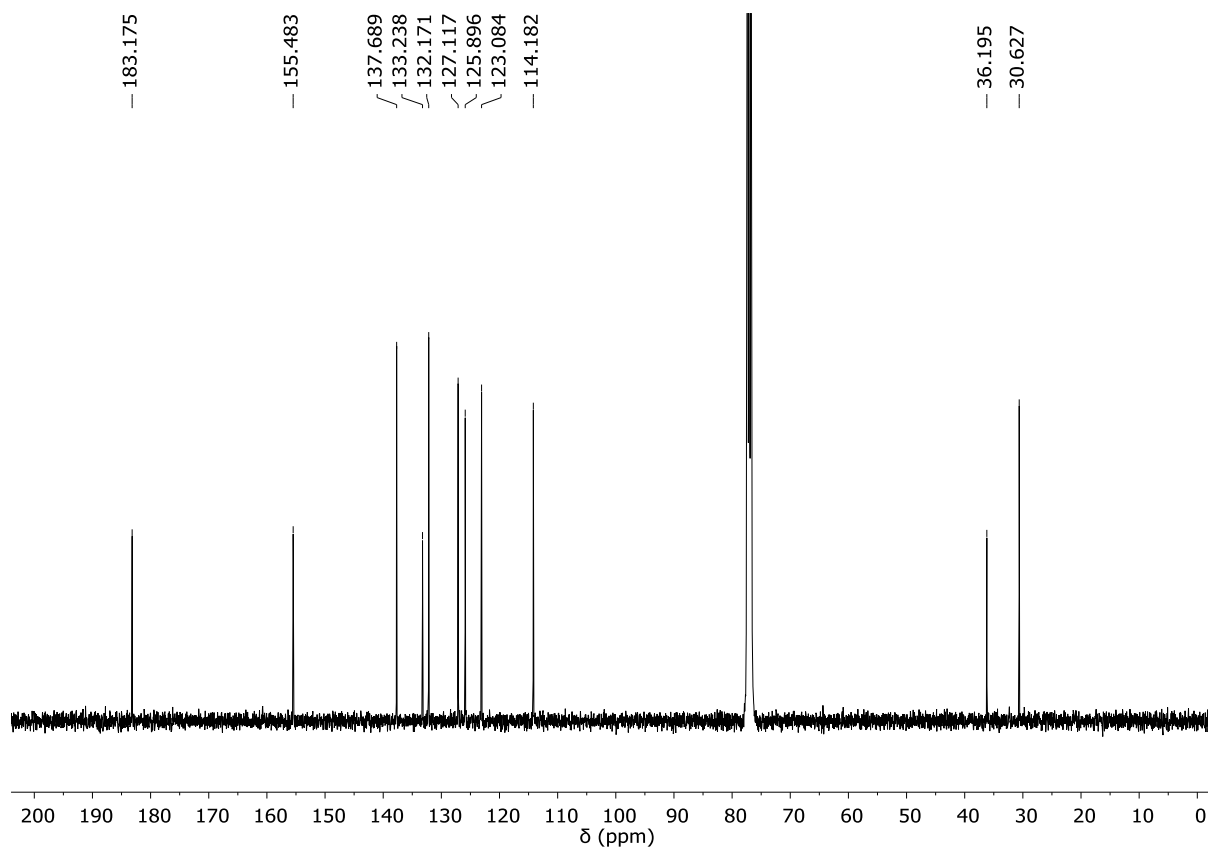

Figure S13.  $^{13}\text{C}$  NMR spectrum of compound **7** in  $\text{CDCl}_3$ .

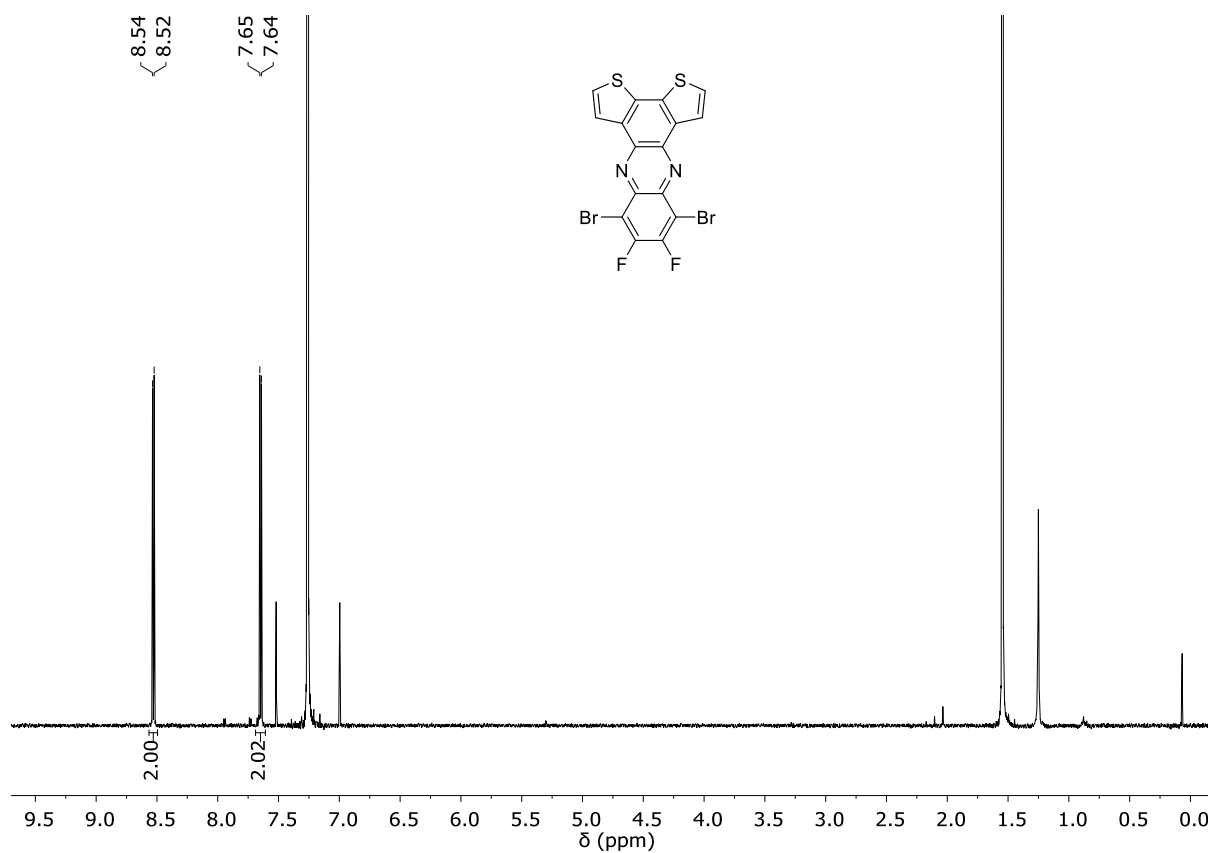

Figure S14.  $^1\text{H}$  NMR spectrum of 8,11-dibromo-9,10-difluorodithieno[3,2-*a*:2',3'-*c*]phenazine (DTPz) in  $\text{CDCl}_3$ .

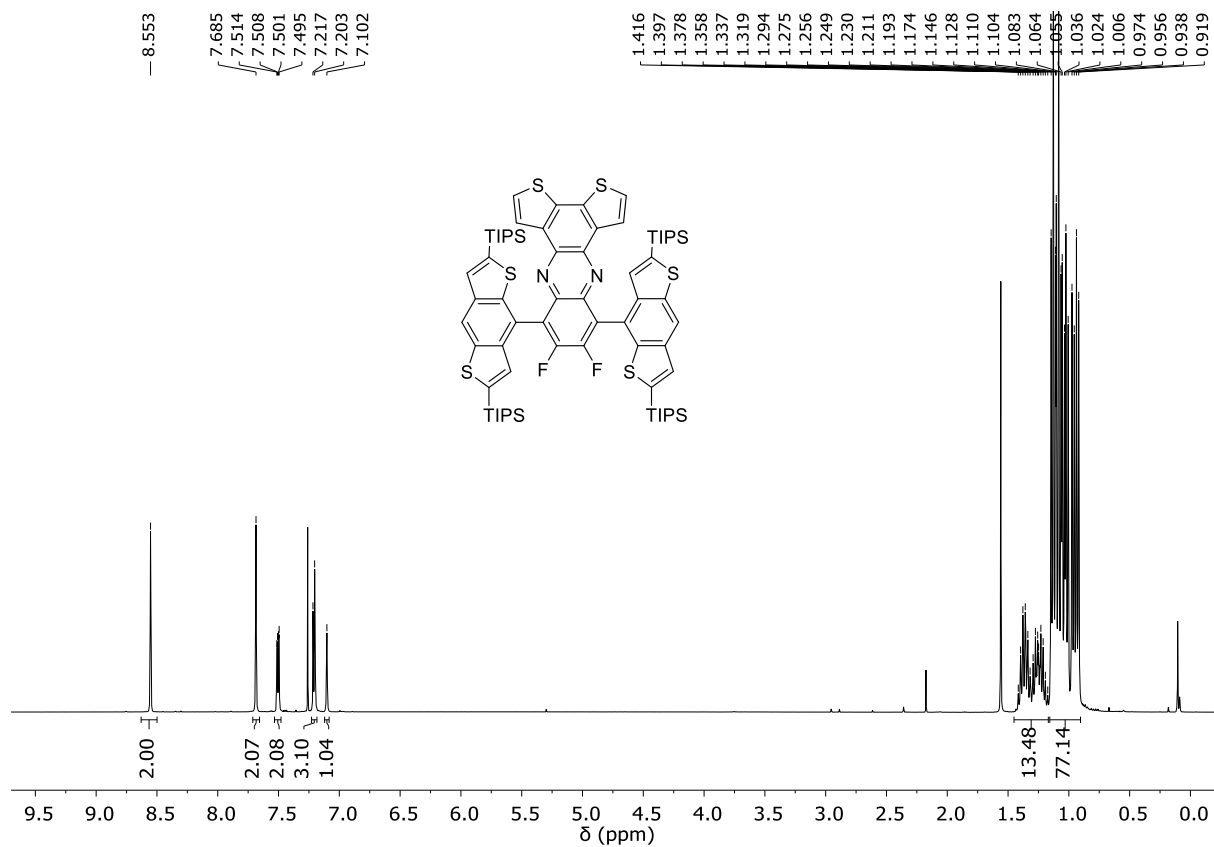

Figure S15. <sup>1</sup>H NMR spectrum of compound 8 in CDCl<sub>3</sub>.

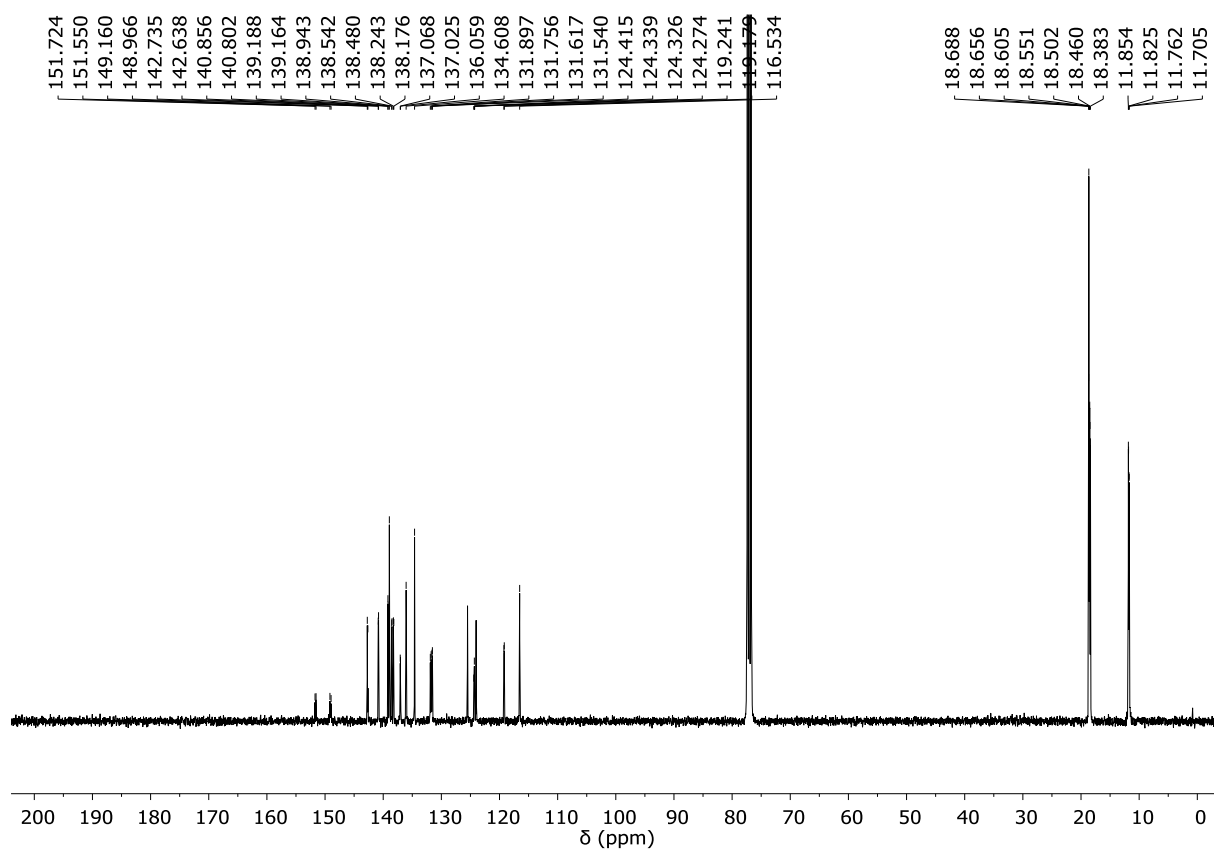

Figure S16. <sup>13</sup>C NMR spectrum of compound 8 in CDCl<sub>3</sub>.

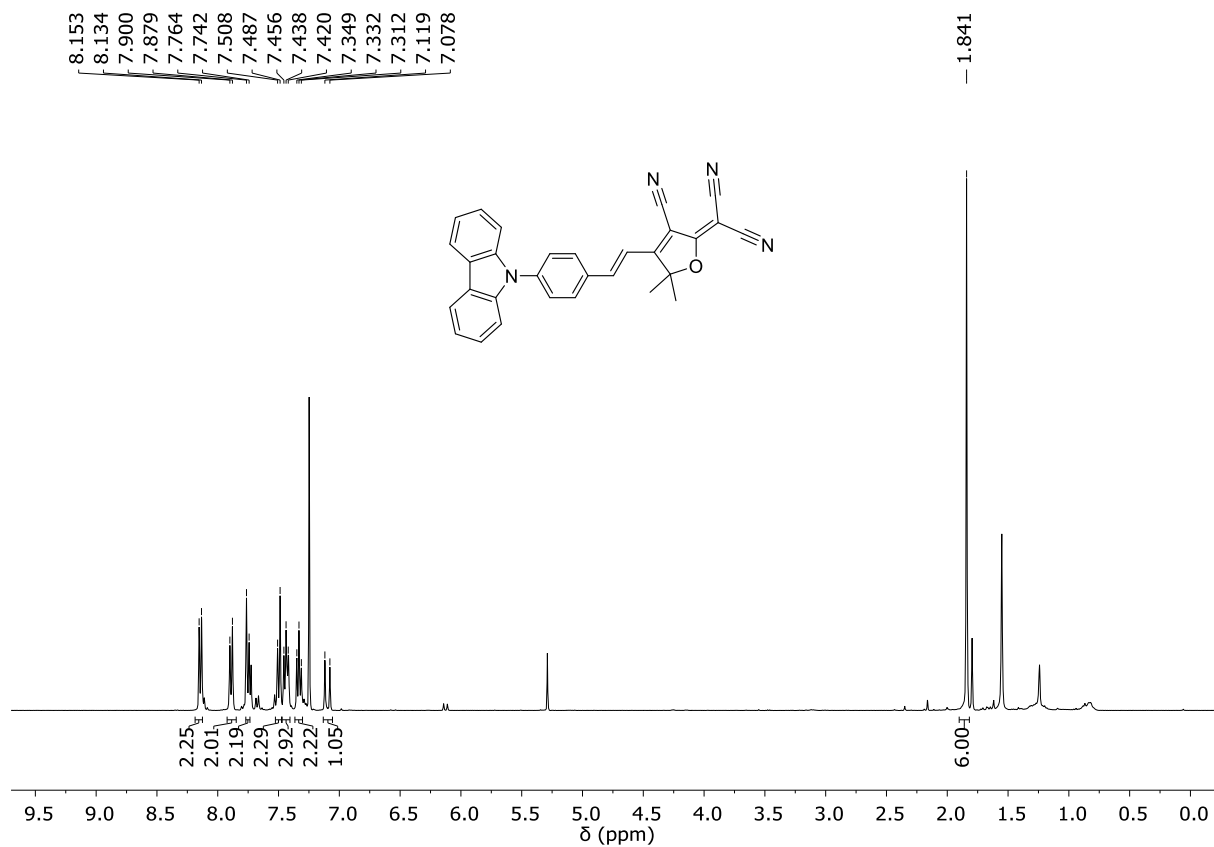

Figure S17. <sup>1</sup>H NMR spectrum of compound 9 in CDCl<sub>3</sub>.

## Coordinates of optimized geometries

### Compound 1:

|   |          |          |          |
|---|----------|----------|----------|
| C | -0.49299 | 0.54175  | 1.20389  |
| C | -0.27555 | 1.93432  | 0.66634  |
| C | -1.39464 | -0.13318 | 0.18650  |
| C | -0.86233 | -0.13217 | -1.10567 |
| C | 0.49299  | 0.54175  | -1.20389 |
| C | 0.86233  | -0.13217 | 1.10567  |
| C | 1.39464  | -0.13318 | -0.18650 |
| C | 0.27555  | 1.93432  | -0.66634 |
| C | 2.61935  | -0.70832 | -0.45063 |
| C | 3.34802  | -1.29575 | 0.59216  |
| C | 2.81679  | -1.28150 | 1.88410  |
| C | 1.57927  | -0.70714 | 2.13843  |
| C | -2.61935 | -0.70832 | 0.45063  |
| C | -3.34802 | -1.29575 | -0.59216 |
| C | -2.81679 | -1.28150 | -1.88410 |
| C | -1.57927 | -0.70714 | -2.13843 |
| N | 0.54616  | 3.01952  | -1.31894 |
| C | 0.27070  | 4.18433  | -0.65388 |
| C | -0.27070 | 4.18433  | 0.65388  |
| N | -0.54616 | 3.01952  | 1.31894  |
| C | 0.53490  | 5.40617  | -1.29109 |
| C | 0.27246  | 6.60045  | -0.65724 |
| C | -0.27247 | 6.60045  | 0.65724  |
| C | -0.53490 | 5.40617  | 1.29109  |
| C | -0.55007 | 7.82927  | 1.32612  |
| N | -0.78038 | 8.81420  | 1.88015  |
| C | 0.55007  | 7.82927  | -1.32612 |
| N | 0.78038  | 8.81420  | -1.88015 |
| N | -4.59677 | -1.88989 | -0.33837 |
| N | 4.59677  | -1.88989 | 0.33837  |
| C | 5.47313  | -1.32916 | -0.62242 |
| C | 4.98965  | -3.05894 | 1.03366  |
| C | -5.47313 | -1.32916 | 0.62242  |
| C | -4.98965 | -3.05894 | -1.03366 |
| C | -6.12687 | -2.15052 | 1.53993  |
| C | -6.99270 | -1.60259 | 2.47263  |
| C | -7.20642 | -0.23155 | 2.51462  |
| C | -6.55242 | 0.58860  | 1.60517  |
| C | -5.69862 | 0.04642  | 0.65810  |
| C | -6.28475 | -3.17365 | -1.53707 |
| C | -6.67429 | -4.32392 | -2.20423 |
| C | -5.77762 | -5.36674 | -2.39241 |
| C | -4.48595 | -5.25231 | -1.89628 |
| C | -4.09383 | -4.11245 | -1.21321 |
| C | 6.12687  | -2.15052 | -1.53993 |
| C | 6.99270  | -1.60259 | -2.47263 |
| C | 7.20642  | -0.23155 | -2.51462 |
| C | 6.55242  | 0.58860  | -1.60517 |
| C | 5.69862  | 0.04642  | -0.65809 |
| C | 6.28475  | -3.17365 | 1.53707  |
| C | 6.67429  | -4.32392 | 2.20423  |
| C | 5.77762  | -5.36674 | 2.39241  |
| C | 4.48595  | -5.25231 | 1.89628  |
| C | 4.09383  | -4.11245 | 1.21321  |
| H | -0.90602 | 0.56452  | 2.21684  |
| H | 0.90602  | 0.56452  | -2.21684 |
| H | 3.02037  | -0.71370 | -1.46258 |
| H | 3.38756  | -1.72566 | 2.69596  |
| H | 1.18252  | -0.70093 | 3.15236  |
| H | -3.02037 | -0.71370 | 1.46258  |
| H | -3.38756 | -1.72566 | -2.69596 |
| H | -1.18251 | -0.70093 | -3.15236 |
| H | 0.95048  | 5.38455  | -2.29496 |
| H | -0.95048 | 5.38455  | 2.29496  |
| H | -5.95017 | -3.22377 | 1.51296  |
| H | -7.49633 | -2.25474 | 3.18270  |
| H | -7.88120 | 0.19612  | 3.25192  |
| H | -6.71915 | 1.66329  | 1.62209  |
| H | -5.19856 | 0.68760  | -0.06480 |
| H | -6.98389 | -2.35161 | -1.39862 |
| H | -7.68766 | -4.39958 | -2.59213 |
| H | -6.08431 | -6.26525 | -2.92203 |
| H | -3.77690 | -6.06649 | -2.02902 |
| H | -3.08606 | -4.02962 | -0.81170 |
| H | 5.95017  | -3.22377 | -1.51296 |
| H | 7.49633  | -2.25474 | -3.18270 |
| H | 7.88120  | 0.19612  | -3.25191 |



|   |         |          |          |
|---|---------|----------|----------|
| H | 6.71915 | 1.66329  | -1.62209 |
| H | 5.19856 | 0.68760  | 0.06480  |
| H | 6.98389 | -2.35161 | 1.39862  |
| H | 7.68766 | -4.39958 | 2.59213  |
| H | 6.08431 | -6.26525 | 2.92203  |
| H | 3.77690 | -6.06649 | 2.02902  |
| H | 3.08606 | -4.02962 | 0.81170  |

Compound 2:

|   |          |          |          |
|---|----------|----------|----------|
| C | 1.39153  | 0.08556  | -0.19235 |
| C | 0.48796  | 0.76594  | -1.20430 |
| C | -0.86328 | 0.08428  | -1.10217 |
| C | 0.86327  | 0.08428  | 1.10217  |
| C | -1.39153 | 0.08556  | 0.19235  |
| C | -0.48796 | 0.76594  | 1.20430  |
| C | 0.27115  | 2.16048  | -0.66381 |
| C | -0.27115 | 2.16048  | 0.66381  |
| C | 1.57776  | -0.49992 | 2.13065  |
| C | 2.81384  | -1.07826 | 1.87206  |
| C | 3.34025  | -1.08762 | 0.58018  |
| C | 2.61258  | -0.49563 | -0.45979 |
| C | -1.57776 | -0.49992 | -2.13065 |
| C | -2.81384 | -1.07826 | -1.87206 |
| C | -3.34025 | -1.08762 | -0.58018 |
| C | -2.61258 | -0.49563 | 0.45979  |
| N | 0.53939  | 3.24656  | -1.31855 |
| N | -0.53939 | 3.24656  | 1.31855  |
| C | 0.26849  | 4.41178  | -0.65629 |
| C | -0.26849 | 4.41178  | 0.65629  |
| C | 0.53078  | 5.63634  | -1.29736 |
| C | -0.53078 | 5.63634  | 1.29736  |
| C | -0.26629 | 6.80751  | 0.65097  |
| C | 0.26629  | 6.80751  | -0.65098 |
| F | 0.50302  | 7.97865  | -1.23025 |
| F | -0.50302 | 7.97865  | 1.23025  |
| N | 4.59100  | -1.68347 | 0.31918  |
| C | 5.49301  | -1.06850 | -0.58030 |
| C | 6.19338  | -1.83491 | -1.51172 |
| C | 7.08160  | -1.23012 | -2.38626 |
| C | 7.27251  | 0.14476  | -2.35829 |
| C | 6.57071  | 0.91051  | -1.43719 |
| C | 5.69396  | 0.31133  | -0.54740 |
| C | 4.95368  | -2.88966 | 0.96136  |
| C | 6.24422  | -3.06237 | 1.46167  |
| C | 6.60044  | -4.25007 | 2.07973  |
| C | 5.67546  | -5.27511 | 2.22402  |
| C | 4.38810  | -5.10272 | 1.73358  |
| C | 4.02865  | -3.92493 | 1.09902  |
| N | -4.59100 | -1.68347 | -0.31918 |
| C | -5.49301 | -1.06850 | 0.58030  |
| C | -6.19338 | -1.83491 | 1.51172  |
| C | -7.08160 | -1.23012 | 2.38626  |
| C | -7.27251 | 0.14476  | 2.35829  |
| C | -6.57071 | 0.91051  | 1.43719  |
| C | -5.69396 | 0.31133  | 0.54740  |
| C | -4.95368 | -2.88966 | -0.96136 |
| C | -6.24422 | -3.06237 | -1.46167 |
| C | -6.60044 | -4.25007 | -2.07973 |
| C | -5.67546 | -5.27511 | -2.22402 |
| C | -4.38810 | -5.10272 | -1.73358 |
| C | -4.02865 | -3.92493 | -1.09902 |
| H | 0.89790  | 0.78912  | -2.21868 |
| H | -0.89790 | 0.78912  | 2.21868  |
| H | 1.18148  | -0.49669 | 3.14486  |
| H | 3.38530  | -1.52953 | 2.67980  |
| H | 3.01414  | -0.49969 | -1.47182 |
| H | -1.18148 | -0.49669 | -3.14486 |
| H | -3.38530 | -1.52953 | -2.67980 |
| H | -3.01414 | -0.49969 | 1.47182  |
| H | 0.94162  | 5.63691  | -2.30276 |
| H | -0.94162 | 5.63692  | 2.30276  |
| H | 6.03430  | -2.91074 | -1.54271 |
| H | 7.62060  | -1.84073 | -3.10736 |
| H | 7.96485  | 0.61709  | -3.05077 |
| H | 6.71616  | 1.98786  | -1.40001 |
| H | 5.15426  | 0.91074  | 0.18276  |
| H | 6.96663  | -2.25525 | 1.36052  |
| H | 7.61075  | -4.36928 | 2.46498  |
| H | 5.95631  | -6.20334 | 2.71541  |
| H | 3.65558  | -5.90086 | 1.83276  |
| H | 3.02346  | -3.79700 | 0.70304  |

|   |          |          |          |
|---|----------|----------|----------|
| H | -6.03430 | -2.91074 | 1.54271  |
| H | -7.62060 | -1.84073 | 3.10736  |
| H | -7.96485 | 0.61709  | 3.05077  |
| H | -6.71616 | 1.98786  | 1.40001  |
| H | -5.15426 | 0.91074  | -0.18276 |
| H | -6.96663 | -2.25525 | -1.36052 |
| H | -7.61075 | -4.36928 | -2.46498 |
| H | -5.95631 | -6.20334 | -2.71541 |
| H | -3.65558 | -5.90086 | -1.83275 |
| H | -3.02346 | -3.79700 | -0.70304 |

Compound 3:

|   |          |          |          |
|---|----------|----------|----------|
| C | -1.45073 | -0.24520 | 0.05712  |
| C | -0.70724 | -1.39693 | 0.01635  |
| C | 0.70724  | -1.39693 | -0.01636 |
| C | 1.45073  | -0.24519 | -0.05713 |
| C | 0.72061  | 0.98567  | -0.04173 |
| C | -0.72062 | 0.98567  | 0.04172  |
| N | 1.24465  | 2.20604  | -0.08403 |
| S | -0.00001 | 3.24974  | -0.00000 |
| N | -1.24466 | 2.20603  | 0.08403  |
| N | -2.85048 | -0.23919 | 0.13601  |
| N | 2.85048  | -0.23918 | -0.13601 |
| C | -3.59569 | 0.55696  | -0.76921 |
| C | -3.51291 | -1.20649 | 0.92766  |
| C | 3.59569  | 0.55697  | 0.76920  |
| C | 3.51291  | -1.20648 | -0.92766 |
| C | -4.61103 | -1.90665 | 0.42994  |
| C | -5.25937 | -2.84206 | 1.22181  |
| C | -4.81549 | -3.10571 | 2.50937  |
| C | -3.71617 | -2.41502 | 3.00389  |
| C | -3.07271 | -1.46812 | 2.22583  |
| C | -4.74486 | 1.21419  | -0.33458 |
| C | -5.47484 | 1.99233  | -1.21557 |
| C | -5.06276 | 2.13886  | -2.53466 |
| C | -3.91602 | 1.48908  | -2.96616 |
| C | -3.19006 | 0.69266  | -2.09348 |
| C | 4.61103  | -1.90664 | -0.42994 |
| C | 5.25938  | -2.84205 | -1.22180 |
| C | 4.81551  | -3.10571 | -2.50935 |
| C | 3.71619  | -2.41503 | -3.00388 |
| C | 3.07272  | -1.46812 | -2.22583 |
| C | 4.74485  | 1.21420  | 0.33459  |
| C | 5.47483  | 1.99234  | 1.21558  |
| C | 5.06275  | 2.13887  | 2.53467  |
| C | 3.91601  | 1.48909  | 2.96617  |
| C | 3.19006  | 0.69267  | 2.09348  |
| H | -1.22606 | -2.35314 | 0.03364  |
| H | 1.22607  | -2.35314 | -0.03365 |
| H | -4.95513 | -1.71026 | -0.58297 |
| H | -6.11529 | -3.37956 | 0.81943  |
| H | -5.32340 | -3.84324 | 3.12581  |
| H | -3.36302 | -2.60499 | 4.01514  |
| H | -2.22212 | -0.91530 | 2.61890  |
| H | -5.05157 | 1.11503  | 0.70438  |
| H | -6.36808 | 2.50413  | -0.86407 |
| H | -5.63347 | 2.75889  | -3.22173 |
| H | -3.58656 | 1.59140  | -3.99790 |
| H | -2.29874 | 0.16936  | -2.43508 |
| H | 4.95513  | -1.71024 | 0.58297  |
| H | 6.11530  | -3.37955 | -0.81942 |
| H | 5.32343  | -3.84323 | -3.12579 |
| H | 3.36304  | -2.60500 | -4.01514 |
| H | 2.22213  | -0.91531 | -2.61891 |
| H | 5.05157  | 1.11504  | -0.70438 |
| H | 6.36807  | 2.50414  | 0.86408  |
| H | 5.63346  | 2.75890  | 3.22173  |
| H | 3.58654  | 1.59140  | 3.99790  |
| H | 2.29873  | 0.16936  | 2.43507  |

Compound 4:

|   |          |          |          |
|---|----------|----------|----------|
| C | -1.43304 | -0.00000 | -0.56141 |
| C | -0.71173 | 0.00000  | -1.71751 |
| C | 0.71170  | 0.00000  | -1.71752 |
| C | 1.43304  | 0.00000  | -0.56145 |
| C | 0.71853  | 0.00000  | 0.67158  |
| C | -0.71850 | -0.00000 | 0.67160  |
| N | 1.25089  | 0.00000  | 1.89022  |
| S | 0.00004  | 0.00000  | 2.92995  |
| N | -1.25084 | 0.00000  | 1.89025  |

|   |          |          |          |
|---|----------|----------|----------|
| C | -3.43872 | 3.64341  | -0.40146 |
| C | -4.80524 | 3.69387  | -0.17643 |
| C | -5.50731 | 2.50664  | -0.06756 |
| C | -4.89669 | 1.25885  | -0.17585 |
| C | -3.51775 | 1.22412  | -0.41135 |
| C | -2.80269 | 2.42319  | -0.51883 |
| C | -5.73757 | 0.00000  | -0.01924 |
| C | -4.89669 | -1.25885 | -0.17585 |
| C | -3.51775 | -1.22412 | -0.41135 |
| N | -2.84823 | -0.00000 | -0.55506 |
| C | -5.50731 | -2.50664 | -0.06756 |
| C | -4.80524 | -3.69387 | -0.17643 |
| C | -3.43872 | -3.64341 | -0.40146 |
| C | -2.80269 | -2.42319 | -0.51883 |
| C | -6.84476 | 0.00000  | -1.08201 |
| C | -6.36352 | 0.00000  | 1.38302  |
| C | 3.43872  | -3.64341 | -0.40154 |
| C | 4.80523  | -3.69387 | -0.17647 |
| C | 5.50730  | -2.50664 | -0.06756 |
| C | 4.89668  | -1.25885 | -0.17587 |
| C | 3.51775  | -1.22412 | -0.41140 |
| C | 2.80269  | -2.42319 | -0.51891 |
| C | 5.73755  | 0.00000  | -0.01920 |
| C | 4.89668  | 1.25885  | -0.17587 |
| C | 3.51775  | 1.22412  | -0.41140 |
| N | 2.84823  | -0.00000 | -0.55512 |
| C | 5.50730  | 2.50664  | -0.06756 |
| C | 4.80523  | 3.69387  | -0.17647 |
| C | 3.43872  | 3.64341  | -0.40154 |
| C | 2.80269  | 2.42319  | -0.51891 |
| C | 6.84481  | 0.00000  | -1.08190 |
| C | 6.36341  | 0.00000  | 1.38309  |
| H | -1.25154 | 0.00000  | -2.66203 |
| H | 1.25149  | 0.00000  | -2.66206 |
| H | -2.85792 | 4.55892  | -0.48811 |
| H | -5.32025 | 4.64655  | -0.08372 |
| H | -6.57914 | 2.55236  | 0.11597  |
| H | -1.73154 | 2.39900  | -0.70055 |
| H | -6.57914 | -2.55236 | 0.11597  |
| H | -5.32025 | -4.64655 | -0.08372 |
| H | -2.85792 | -4.55892 | -0.48812 |
| H | -1.73154 | -2.39900 | -0.70055 |
| H | -6.41516 | 0.00000  | -2.09011 |
| H | -7.48831 | -0.88170 | -0.99148 |
| H | -7.48831 | 0.88170  | -0.99148 |
| H | -6.99259 | 0.88286  | 1.54141  |
| H | -6.99259 | -0.88286 | 1.54141  |
| H | -5.58255 | 0.00000  | 2.15172  |
| H | 2.85793  | -4.55892 | -0.48822 |
| H | 5.32024  | -4.64655 | -0.08374 |
| H | 6.57912  | -2.55236 | 0.11600  |
| H | 1.73155  | -2.39900 | -0.70066 |
| H | 6.57912  | 2.55236  | 0.11600  |
| H | 5.32024  | 4.64655  | -0.08374 |
| H | 2.85793  | 4.55892  | -0.48821 |
| H | 1.73155  | 2.39900  | -0.70066 |
| H | 6.41527  | -0.00000 | -2.09003 |
| H | 7.48835  | 0.88170  | -0.99134 |
| H | 7.48835  | -0.88170 | -0.99134 |
| H | 6.99248  | -0.88287 | 1.54152  |
| H | 6.99248  | 0.88286  | 1.54152  |
| H | 5.58240  | 0.00000  | 2.15175  |

Compound 5:

|   |          |          |          |
|---|----------|----------|----------|
| C | 5.28677  | -0.52589 | -1.09942 |
| O | 5.68719  | -0.90143 | -2.17940 |
| C | 8.43949  | 0.65143  | 0.56291  |
| C | 7.49784  | 0.37506  | -0.41462 |
| C | 6.27768  | -0.17166 | -0.03247 |
| C | 6.08041  | -0.44706 | 1.31655  |
| C | 7.10175  | -0.15384 | 2.21031  |
| N | 8.25763  | 0.39643  | 1.85676  |
| C | 3.83173  | -0.41367 | -0.81822 |
| C | 3.30434  | 0.44216  | 0.14923  |
| C | 1.93603  | 0.55350  | 0.32307  |
| C | 1.06769  | -0.19366 | -0.47055 |
| C | 1.58797  | -1.04187 | -1.45028 |
| C | 2.95312  | -1.14080 | -1.62351 |
| N | -0.32089 | -0.08976 | -0.29238 |
| C | -1.21250 | -1.15848 | -0.17105 |
| C | -0.97492 | -2.52312 | -0.14802 |

|   |          |          |          |
|---|----------|----------|----------|
| C | -2.05987 | -3.37149 | 0.02260  |
| C | -3.37201 | -2.90456 | 0.17698  |
| C | -3.57813 | -1.52701 | 0.16925  |
| C | -2.51368 | -0.65282 | 0.00100  |
| C | -2.41128 | 0.78661  | -0.02169 |
| C | -3.34716 | 1.80685  | 0.07098  |
| C | -2.95561 | 3.14063  | -0.01826 |
| C | -1.59520 | 3.41223  | -0.21596 |
| C | -0.63538 | 2.41449  | -0.31217 |
| C | -1.05108 | 1.09770  | -0.20038 |
| C | -4.00624 | 4.24307  | 0.08939  |
| C | -3.40271 | 5.63782  | -0.03166 |
| C | -5.03787 | 4.07926  | -1.02879 |
| C | -4.70788 | 4.15081  | 1.44602  |
| C | -4.56197 | -3.84364 | 0.35810  |
| C | -4.15320 | -5.31231 | 0.34577  |
| C | -5.24281 | -3.55706 | 1.69819  |
| C | -5.56357 | -3.62509 | -0.77782 |
| H | 9.39705  | 1.09704  | 0.29172  |
| H | 7.69646  | 0.57118  | -1.46483 |
| H | 5.16158  | -0.90901 | 1.66967  |
| H | 6.97787  | -0.37445 | 3.27127  |
| H | 3.96756  | 1.04144  | 0.76856  |
| H | 1.52939  | 1.20509  | 1.09224  |
| H | 0.90680  | -1.59485 | -2.09212 |
| H | 3.37078  | -1.77370 | -2.40242 |
| H | 0.02854  | -2.92950 | -0.24721 |
| H | -1.86363 | -4.43975 | 0.03708  |
| H | -4.57993 | -1.11962 | 0.30195  |
| H | -4.39705 | 1.54937  | 0.20746  |
| H | -1.25927 | 4.44146  | -0.30396 |
| H | 0.40657  | 2.67113  | -0.48599 |
| H | -2.91177 | 5.79281  | -0.99999 |
| H | -4.19350 | 6.39226  | 0.05524  |
| H | -2.67149 | 5.84130  | 0.75999  |
| H | -5.79764 | 4.86941  | -0.97103 |
| H | -4.56142 | 4.14046  | -2.01470 |
| H | -5.55999 | 3.11773  | -0.97345 |
| H | -5.21617 | 3.19022  | 1.58465  |
| H | -5.46427 | 4.94028  | 1.54371  |
| H | -3.99093 | 4.26691  | 2.26782  |
| H | -3.45827 | -5.55438 | 1.15893  |
| H | -5.03934 | -5.94433 | 0.47750  |
| H | -3.68559 | -5.60273 | -0.60278 |
| H | -6.09685 | -4.23006 | 1.84851  |
| H | -4.54613 | -3.70455 | 2.53225  |
| H | -5.61981 | -2.53030 | 1.76046  |
| H | -5.94785 | -2.59933 | -0.79912 |
| H | -6.42474 | -4.29674 | -0.66747 |
| H | -5.10214 | -3.82541 | -1.75239 |

Compound 6:

|   |          |          |          |
|---|----------|----------|----------|
| C | -1.21252 | 0.07414  | -1.52168 |
| C | -1.20052 | 0.06858  | -2.91081 |
| C | 0.00001  | -0.00002 | -3.59844 |
| C | 1.20053  | -0.06860 | -2.91080 |
| C | 1.21252  | -0.07414 | -1.52167 |
| C | -0.00000 | 0.00001  | -0.81534 |
| C | -4.62408 | -0.21476 | -0.31062 |
| C | -4.21138 | 1.02268  | 0.30834  |
| C | -2.86584 | 1.22930  | -0.04168 |
| N | -2.43587 | 0.16066  | -0.83617 |
| C | -3.51326 | -0.70851 | -1.01708 |
| C | -3.58406 | -1.90068 | -1.71650 |
| C | -4.78982 | -2.58869 | -1.70806 |
| C | -5.92020 | -2.12696 | -1.02059 |
| C | -5.81411 | -0.92818 | -0.31817 |
| C | -4.86971 | 1.95944  | 1.09246  |
| C | -4.21201 | 3.10696  | 1.52831  |
| C | -2.87633 | 3.28538  | 1.14331  |
| C | -2.19012 | 2.36653  | 0.36274  |
| C | 4.62408  | 0.21476  | -0.31062 |
| C | 4.21138  | -1.02268 | 0.30834  |
| C | 2.86584  | -1.22929 | -0.04167 |
| N | 2.43586  | -0.16065 | -0.83615 |
| C | 3.51325  | 0.70851  | -1.01706 |
| C | 3.58406  | 1.90068  | -1.71649 |
| C | 4.78982  | 2.58869  | -1.70805 |
| C | 5.92020  | 2.12696  | -1.02059 |
| C | 5.81411  | 0.92818  | -0.31816 |
| C | 4.86971  | -1.95944 | 1.09246  |

|   |          |          |          |
|---|----------|----------|----------|
| C | 4.21200  | -3.10695 | 1.52831  |
| C | 2.87633  | -3.28538 | 1.14332  |
| C | 2.19012  | -2.36652 | 0.36276  |
| C | -0.00000 | 0.00001  | 0.60971  |
| N | -0.00000 | 0.00002  | 1.76319  |
| C | 4.95627  | -4.11672 | 2.39862  |
| C | 4.08925  | -5.31290 | 2.77521  |
| C | 6.17992  | -4.64260 | 1.64548  |
| C | 5.40879  | -3.43809 | 3.69324  |
| C | 7.24372  | 2.88818  | -1.01263 |
| C | 7.18272  | 4.17369  | -1.82994 |
| C | 7.61058  | 3.26283  | 0.42488  |
| C | 8.34538  | 2.00703  | -1.60535 |
| C | -4.95627 | 4.11672  | 2.39862  |
| C | -4.08925 | 5.31289  | 2.77521  |
| C | -6.17992 | 4.64260  | 1.64548  |
| C | -5.40878 | 3.43808  | 3.69324  |
| C | -7.24372 | -2.88818 | -1.01262 |
| C | -7.18272 | -4.17369 | -1.82994 |
| C | -7.61056 | -3.26284 | 0.42489  |
| C | -8.34538 | -2.00704 | -1.60533 |
| H | -2.14724 | 0.13715  | -3.44049 |
| H | 0.00001  | -0.00003 | -4.68543 |
| H | 2.14726  | -0.13718 | -3.44047 |
| H | -2.72439 | -2.29867 | -2.25135 |
| H | -4.83929 | -3.52342 | -2.25914 |
| H | -6.66693 | -0.53813 | 0.23649  |
| H | -5.91196 | 1.78668  | 1.35905  |
| H | -2.33749 | 4.17193  | 1.46458  |
| H | -1.15272 | 2.54448  | 0.08951  |
| H | 2.72438  | 2.29867  | -2.25133 |
| H | 4.83929  | 3.52342  | -2.25914 |
| H | 6.66694  | 0.53813  | 0.23649  |
| H | 5.91196  | -1.78669 | 1.35905  |
| H | 2.33748  | -4.17192 | 1.46459  |
| H | 1.15272  | -2.54447 | 0.08953  |
| H | 4.66650  | -6.00720 | 3.39723  |
| H | 3.20584  | -5.01650 | 3.35327  |
| H | 3.75077  | -5.87093 | 1.89374  |
| H | 6.72265  | -5.37578 | 2.25614  |
| H | 6.88457  | -3.84352 | 1.39009  |
| H | 5.88472  | -5.13455 | 0.71066  |
| H | 4.54993  | -3.05010 | 4.25383  |
| H | 5.93970  | -4.15099 | 4.33749  |
| H | 6.08612  | -2.59780 | 3.50451  |
| H | 8.15394  | 4.68125  | -1.79458 |
| H | 6.95512  | 3.98156  | -2.88552 |
| H | 6.43562  | 4.87563  | -1.44031 |
| H | 8.55712  | 3.81822  | 0.44913  |
| H | 7.73056  | 2.38184  | 1.06485  |
| H | 6.83626  | 3.89516  | 0.87571  |
| H | 8.10878  | 1.72379  | -2.63820 |
| H | 9.30437  | 2.54111  | -1.61294 |
| H | 8.48900  | 1.08315  | -1.03435 |
| H | -4.66650 | 6.00720  | 3.39723  |
| H | -3.20584 | 5.01650  | 3.35327  |
| H | -3.75077 | 5.87093  | 1.89374  |
| H | -6.72265 | 5.37577  | 2.25616  |
| H | -6.88458 | 3.84352  | 1.39010  |
| H | -5.88473 | 5.13455  | 0.71067  |
| H | -4.54992 | 3.05009  | 4.25382  |
| H | -5.93969 | 4.15098  | 4.33750  |
| H | -6.08611 | 2.59780  | 3.50452  |
| H | -8.15393 | -4.68125 | -1.79458 |
| H | -6.95512 | -3.98156 | -2.88552 |
| H | -6.43561 | -4.87563 | -1.44031 |
| H | -8.55711 | -3.81823 | 0.44915  |
| H | -7.73055 | -2.38185 | 1.06486  |
| H | -6.83624 | -3.89517 | 0.87571  |
| H | -8.10880 | -1.72379 | -2.63819 |
| H | -9.30437 | -2.54112 | -1.61292 |
| H | -8.48900 | -1.08316 | -1.03433 |

Compound 7:

|   |          |          |          |
|---|----------|----------|----------|
| S | 0.45660  | -0.11355 | -2.08518 |
| C | 0.63355  | -0.16894 | -0.35971 |
| C | -0.63355 | -0.16894 | 0.35971  |
| C | -1.72405 | -0.12961 | -0.42772 |
| C | -1.39455 | -0.08653 | -1.87457 |
| C | 1.72405  | -0.12961 | 0.42772  |
| C | 1.39455  | -0.08653 | 1.87457  |

|   |          |          |          |
|---|----------|----------|----------|
| S | -0.45660 | -0.11355 | 2.08518  |
| O | -2.14042 | -0.03733 | -2.79653 |
| O | 2.14042  | -0.03733 | 2.79653  |
| N | 3.06606  | -0.05520 | 0.05521  |
| C | 3.70403  | 1.20128  | 0.11778  |
| C | 5.10200  | 1.25300  | 0.16276  |
| C | 5.86460  | -0.04595 | 0.35697  |
| C | 5.16517  | -1.15110 | -0.42009 |
| C | 3.76384  | -1.17430 | -0.44801 |
| C | 5.84462  | -2.21672 | -0.99963 |
| C | 5.17569  | -3.30185 | -1.54651 |
| C | 3.79236  | -3.33662 | -1.50848 |
| C | 3.08686  | -2.27470 | -0.96827 |
| C | 2.95082  | 2.37341  | 0.08693  |
| C | 3.58076  | 3.60602  | 0.08793  |
| C | 4.96364  | 3.67485  | 0.09556  |
| C | 5.70734  | 2.50349  | 0.12953  |
| C | 5.79144  | -0.40833 | 1.85266  |
| C | 7.33207  | 0.08655  | -0.02472 |
| N | -3.06606 | -0.05520 | -0.05521 |
| C | -3.70403 | 1.20128  | -0.11778 |
| C | -5.10200 | 1.25300  | -0.16277 |
| C | -5.86460 | -0.04595 | -0.35698 |
| C | -5.16518 | -1.15110 | 0.42009  |
| C | -3.76384 | -1.17430 | 0.44801  |
| C | -5.84462 | -2.21672 | 0.99963  |
| C | -5.17569 | -3.30185 | 1.54652  |
| C | -3.79236 | -3.33662 | 1.50849  |
| C | -3.08686 | -2.27470 | 0.96828  |
| C | -2.95082 | 2.37341  | -0.08693 |
| C | -3.58077 | 3.60602  | -0.08793 |
| C | -4.96364 | 3.67485  | -0.09555 |
| C | -5.70734 | 2.50349  | -0.12953 |
| C | -5.79143 | -0.40833 | -1.85267 |
| C | -7.33207 | 0.08655  | 0.02470  |
| H | 6.93103  | -2.21690 | -1.00935 |
| H | 5.73745  | -4.12248 | -1.98533 |
| H | 3.24960  | -4.18735 | -1.91342 |
| H | 2.00142  | -2.30674 | -0.95779 |
| H | 1.86528  | 2.32276  | 0.03703  |
| H | 2.98297  | 4.51394  | 0.06410  |
| H | 5.46796  | 4.63773  | 0.08143  |
| H | 6.79134  | 2.57546  | 0.14661  |
| H | 4.75768  | -0.49406 | 2.20279  |
| H | 6.29593  | -1.36517 | 2.03645  |
| H | 6.28427  | 0.36644  | 2.45323  |
| H | 7.82423  | 0.85608  | 0.57775  |
| H | 7.87496  | -0.84173 | 0.17771  |
| H | 7.46350  | 0.34010  | -1.08320 |
| H | -6.93103 | -2.21690 | 1.00934  |
| H | -5.73745 | -4.12248 | 1.98534  |
| H | -3.24960 | -4.18734 | 1.91342  |
| H | -2.00142 | -2.30674 | 0.95779  |
| H | -1.86528 | 2.32276  | -0.03702 |
| H | -2.98297 | 4.51394  | -0.06410 |
| H | -5.46796 | 4.63773  | -0.08143 |
| H | -6.79135 | 2.57545  | -0.14661 |
| H | -4.75767 | -0.49406 | -2.20279 |
| H | -6.29592 | -1.36517 | -2.03646 |
| H | -6.28426 | 0.36643  | -2.45324 |
| H | -7.87495 | -0.84173 | -0.17772 |
| H | -7.46351 | 0.34009  | 1.08319  |
| H | -7.82422 | 0.85608  | -0.57776 |

Compound 8:

|   |          |          |          |
|---|----------|----------|----------|
| C | 0.70998  | 4.35036  | -0.85725 |
| C | 0.71865  | 1.94533  | -0.41095 |
| C | -0.71864 | 1.94533  | -0.41096 |
| C | 1.41993  | 3.17893  | -0.63476 |
| C | 2.82795  | 3.37948  | -0.64417 |
| C | 3.16089  | 4.67124  | -0.87514 |
| S | 1.77312  | 5.69721  | -1.08747 |
| S | -1.77310 | 5.69722  | -1.08748 |
| C | -3.16087 | 4.67125  | -0.87515 |
| C | -2.82793 | 3.37948  | -0.64420 |
| C | -1.41990 | 3.17893  | -0.63478 |
| C | -0.70996 | 4.35036  | -0.85726 |
| C | 0.70801  | -2.61692 | 0.55487  |
| C | -0.70802 | -2.61691 | 0.55487  |
| C | -1.43813 | -1.49172 | 0.30463  |
| C | -0.71414 | -0.28724 | 0.04310  |

|   |          |          |          |
|---|----------|----------|----------|
| C | 0.71415  | -0.28724 | 0.04311  |
| C | 1.43812  | -1.49172 | 0.30464  |
| F | 1.30144  | -3.77320 | 0.81641  |
| F | -1.30146 | -3.77319 | 0.81643  |
| N | 1.40079  | 0.83356  | -0.20456 |
| N | -1.40078 | 0.83356  | -0.20459 |
| C | -2.91573 | -1.51508 | 0.29868  |
| C | 2.91573  | -1.51510 | 0.29869  |
| C | -3.61570 | -2.21883 | -0.68997 |
| C | -5.03285 | -2.23105 | -0.68022 |
| C | -5.77208 | -1.56854 | 0.28039  |
| C | 3.61568  | -2.21876 | -0.69004 |
| C | 5.03284  | -2.23098 | -0.68029 |
| C | 5.77207  | -1.56856 | 0.28038  |
| C | -5.08464 | -0.86508 | 1.26536  |
| C | -3.66746 | -0.84693 | 1.25821  |
| C | -3.09143 | -2.96785 | -1.79391 |
| C | -4.05350 | -3.51530 | -2.56378 |
| C | -5.62175 | -0.11565 | 2.36230  |
| C | -4.66648 | 0.43164  | 3.14008  |
| C | 5.08464  | -0.86520 | 1.26542  |
| C | 3.66746  | -0.84705 | 1.25828  |
| C | 3.09141  | -2.96768 | -1.79403 |
| C | 4.05347  | -3.51507 | -2.56396 |
| C | 5.62175  | -0.11587 | 2.36244  |
| C | 4.66648  | 0.43134  | 3.14027  |
| S | 3.04586  | 0.08901  | 2.60014  |
| S | 5.66887  | -3.16769 | -2.01550 |
| S | -5.66889 | -3.16787 | -2.01535 |
| S | -3.04586 | 0.08926  | 2.59997  |
| H | 3.53970  | 2.57692  | -0.47687 |
| H | 4.14871  | 5.10990  | -0.93763 |
| H | -4.14869 | 5.10990  | -0.93765 |
| H | -3.53968 | 2.57692  | -0.47690 |
| H | -6.86022 | -1.59159 | 0.27624  |
| H | 6.86021  | -1.59161 | 0.27622  |
| H | -2.03085 | -3.07934 | -1.99785 |
| H | -3.92244 | -4.12234 | -3.45134 |
| H | -6.68665 | -0.00626 | 2.54619  |
| H | -4.80165 | 1.03962  | 4.02650  |
| H | 2.03083  | -3.07915 | -1.99797 |
| H | 3.92241  | -4.12204 | -3.45156 |
| H | 6.68665  | -0.00650 | 2.54633  |
| H | 4.80166  | 1.03923  | 4.02675  |

Compound 9:

|   |          |          |          |
|---|----------|----------|----------|
| C | 0.95725  | -1.51166 | 0.79312  |
| C | 0.06878  | -0.55890 | 0.27909  |
| C | 0.61205  | 0.58352  | -0.32707 |
| C | 1.97526  | 0.76077  | -0.41308 |
| C | 2.84884  | -0.19606 | 0.11326  |
| C | 2.32458  | -1.33667 | 0.72009  |
| C | -1.35259 | -0.79640 | 0.39437  |
| C | -2.34390 | 0.02150  | -0.02048 |
| C | -6.00488 | 0.03977  | -0.05433 |
| O | -5.82954 | -1.13675 | 0.53770  |
| C | -4.41496 | -1.43279 | 0.69740  |
| C | -3.74276 | -0.22475 | 0.09495  |
| C | -4.71843 | 0.62736  | -0.33960 |
| C | -4.18094 | -1.57560 | 2.18884  |
| C | -4.16351 | -2.71397 | -0.07377 |
| C | -4.45561 | 1.87088  | -0.96194 |
| N | -4.14288 | 2.86476  | -1.45828 |
| C | -7.26633 | 0.50605  | -0.29833 |
| C | -8.38634 | -0.27754 | 0.08590  |
| N | -9.29551 | -0.91636 | 0.39909  |
| C | -7.49646 | 1.75575  | -0.92741 |
| N | -7.70744 | 2.76988  | -1.43796 |
| C | 6.29963  | 0.95217  | 0.14432  |
| C | 6.45137  | -0.39375 | -0.34764 |
| C | 5.16467  | -0.95971 | -0.40604 |
| N | 4.23467  | -0.00968 | 0.02814  |
| C | 4.92569  | 1.15921  | 0.36401  |
| C | 4.44715  | 2.35206  | 0.89209  |
| C | 5.36832  | 3.34971  | 1.16768  |
| C | 6.73301  | 3.16734  | 0.93378  |
| C | 7.20523  | 1.96884  | 0.42924  |
| C | 7.55251  | -1.13914 | -0.75597 |
| C | 7.35706  | -2.42698 | -1.22213 |
| C | 6.07114  | -2.96674 | -1.29568 |
| C | 4.95902  | -2.24411 | -0.89442 |

|   |          |          |          |
|---|----------|----------|----------|
| H | 0.55901  | -2.40194 | 1.27767  |
| H | -0.04063 | 1.33914  | -0.75761 |
| H | 2.38361  | 1.63270  | -0.91727 |
| H | 2.99901  | -2.06841 | 1.15688  |
| H | -1.61445 | -1.74185 | 0.87122  |
| H | -2.08667 | 0.97023  | -0.49320 |
| H | -3.14834 | -1.85882 | 2.41059  |
| H | -4.39875 | -0.63570 | 2.70555  |
| H | -4.84497 | -2.34966 | 2.58544  |
| H | -3.13021 | -3.05482 | 0.03500  |
| H | -4.82794 | -3.49762 | 0.30280  |
| H | -4.36825 | -2.56990 | -1.13922 |
| H | 3.39077  | 2.50164  | 1.09936  |
| H | 5.01766  | 4.29321  | 1.57908  |
| H | 7.42779  | 3.97235  | 1.15927  |
| H | 8.27021  | 1.81799  | 0.26274  |
| H | 8.55169  | -0.70945 | -0.71533 |
| H | 8.20776  | -3.02245 | -1.54360 |
| H | 5.93559  | -3.97465 | -1.68082 |
| H | 3.96234  | -2.66923 | -0.97869 |

Compound 10:

|   |          |          |          |
|---|----------|----------|----------|
| S | 0.00000  | 3.71085  | -0.00000 |
| C | 1.37898  | 2.57473  | 0.08411  |
| C | -1.37898 | 2.57473  | -0.08411 |
| O | 0.07230  | 4.40991  | -1.27028 |
| O | -0.07230 | 4.40992  | 1.27026  |
| C | -1.87018 | 2.20090  | -1.32577 |
| C | -2.88856 | 1.26231  | -1.38790 |
| C | -3.38868 | 0.70216  | -0.21878 |
| C | -2.89373 | 1.09638  | 1.02100  |
| C | -1.88449 | 2.04099  | 1.09371  |
| C | 1.87018  | 2.20091  | 1.32578  |
| C | 2.88857  | 1.26233  | 1.38792  |
| C | 3.38868  | 0.70217  | 0.21880  |
| C | 2.89374  | 1.09637  | -1.02098 |
| C | 1.88449  | 2.04099  | -1.09370 |
| N | 4.39342  | -0.29744 | 0.29585  |
| N | -4.39341 | -0.29745 | -0.29582 |
| C | 4.01893  | -1.63719 | 0.49205  |
| C | 5.01161  | -2.62302 | 0.47710  |
| O | 6.33218  | -2.31834 | 0.27840  |
| C | 6.65936  | -1.03607 | -0.07804 |
| C | 5.71652  | -0.00303 | -0.07153 |
| C | -4.01893 | -1.63720 | -0.49203 |
| C | -5.01162 | -2.62303 | -0.47709 |
| O | -6.33218 | -2.31834 | -0.27838 |
| C | -6.65937 | -1.03606 | 0.07804  |
| C | -5.71651 | -0.00303 | 0.07154  |
| C | -2.70146 | -2.03183 | -0.69851 |
| C | -2.38384 | -3.37003 | -0.90477 |
| C | -3.37647 | -4.33260 | -0.89572 |
| C | -4.69441 | -3.95084 | -0.67423 |
| C | -7.97263 | -0.79390 | 0.42322  |
| C | -8.38406 | 0.49036  | 0.75964  |
| C | -7.46487 | 1.52344  | 0.74485  |
| C | -6.13957 | 1.27887  | 0.40328  |
| C | 2.70146  | -2.03181 | 0.69853  |
| C | 2.38383  | -3.37001 | 0.90478  |
| C | 3.37645  | -4.33259 | 0.89571  |
| C | 4.69440  | -3.95083 | 0.67422  |
| C | 7.97262  | -0.79392 | -0.42325 |
| C | 8.38405  | 0.49033  | -0.75969 |
| C | 7.46487  | 1.52342  | -0.74489 |
| C | 6.13957  | 1.27887  | -0.40330 |
| H | -1.46841 | 2.65918  | -2.22598 |
| H | -3.30207 | 0.94356  | -2.34194 |
| H | -3.31066 | 0.65114  | 1.92192  |
| H | -1.49235 | 2.37116  | 2.05262  |
| H | 1.46842  | 2.65920  | 2.22598  |
| H | 3.30208  | 0.94359  | 2.34196  |
| H | 3.31066  | 0.65113  | -1.92190 |
| H | 1.49236  | 2.37114  | -2.05262 |
| H | -1.91217 | -1.28419 | -0.70278 |
| H | -1.34702 | -3.64907 | -1.07478 |
| H | -3.13585 | -5.37974 | -1.05718 |
| H | -5.50562 | -4.67424 | -0.65332 |
| H | -8.66295 | -1.63366 | 0.41357  |
| H | -9.42105 | 0.67403  | 1.02681  |
| H | -7.76969 | 2.53574  | 0.99702  |
| H | -5.42646 | 2.09900  | 0.38411  |



|   |         |          |          |
|---|---------|----------|----------|
| H | 1.91217 | -1.28417 | 0.70280  |
| H | 1.34701 | -3.64906 | 1.07479  |
| H | 3.13583 | -5.37974 | 1.05716  |
| H | 5.50560 | -4.67424 | 0.65331  |
| H | 8.66293 | -1.63368 | -0.41361 |
| H | 9.42103 | 0.67400  | -1.02688 |
| H | 7.76968 | 2.53572  | -0.99707 |
| H | 5.42647 | 2.09900  | -0.38412 |

## References

1. K. Kawasumi, T. Wu, T. Zhu, H. S. Chae, T. Van Voorhis, M. A. Baldo and T. M. Swager, *J. Am. Chem. Soc.*, 2015, **137**, 11908-11911.
2. C. Y. Chan, L. S. Cui, J. U. Kim, H. Nakanotani and C. Adachi, *Adv. Funct. Mater.*, 2018, **28**, 1706023.
3. F. Ni, Z. Wu, Z. Zhu, T. Chen, K. Wu, C. Zhong, K. An, D. Wei, D. Ma and C. Yang, *J. Mater. Chem. C*, 2017, **5**, 1363-1368.
4. P. Rajamalli, N. Senthilkumar, P. Gandeepan, C. C. Ren-Wu, H. W. Lin and C. H. Cheng, *ACS Appl. Mater. Interfaces*, 2016, **8**, 27026-27034.
5. B. Zhao, G. Xie, H. Wang, C. Han and H. Xu, *Chemistry*, 2019, **25**, 1010-1017.
6. K. Kawabata, I. Osaka, M. Nakano, N. Takemura, T. Koganezawa and K. Takimiya, *Adv. Electron. Mater.*, 2015, **1**, 1500039.
7. M. Nakano, S. Shinamura, R. Sugimoto, I. Osaka, E. Miyazaki and K. Takimiya, *Org. Lett.*, 2012, **14**, 5448-5451.
8. H.-Y. Liu, P.-J. Wu, S.-Y. Kuo, C.-P. Chen, E.-H. Chang, C.-Y. Wu and Y.-H. Chan, *J. Am. Chem. Soc.*, 2015, **137**, 10420-10429.
